# Supplementary material for: Cryotherapy associated with tailored land-based exercises for knee osteoarthritis: a protocol for a double-blind sham-controlled randomised trial
Source: PubMed Central journal article supplement — BMJ Open. 2020 Jun 1;10(6):e035610. doi: 10.1136/bmjopen-2019-035610 (PMC7265131; doi:10.1136/bmjopen-2019-035610), 2020-06-01
Supplement: bmjopen-2019-035610.draft_revisions.pdf [file bmjopen-2019-035610.draft_revisions.pdf]

# BMJ Open

BMJ Open is committed to open peer review. As part of this commitment we make the peer review history of every article we publish publicly available.

When an article is published we post the peer reviewers' comments and the authors' responses online. We also post the versions of the paper that were used during peer review. These are the versions that the peer review comments apply to.

The versions of the paper that follow are the versions that were submitted during the peer review process. They are not the versions of record or the final published versions. They should not be cited or distributed as the published version of this manuscript.

BMJ Open is an open access journal and the full, final, typeset and author-corrected version of record of the manuscript is available on our site with no access controls, subscription charges or pay-per-view fees (<http://bmjopen.bmj.com>).

If you have any questions on BMJ Open's open peer review process please email [info.bmjopen@bmj.com](mailto:info.bmjopen@bmj.com)

# BMJ Open

## CRYOTHERAPY ASSOCIATED WITH TAILORED LAND-BASED EXERCISES FOR INDIVIDUALS WITH KNEE OSTEOARTHRITIS: A PROTOCOL FOR A RANDOMIZED TRIAL

|                               |                                                                                                                                                                                                                                                                                                                                                                                                                                                                                           |
|-------------------------------|-------------------------------------------------------------------------------------------------------------------------------------------------------------------------------------------------------------------------------------------------------------------------------------------------------------------------------------------------------------------------------------------------------------------------------------------------------------------------------------------|
| Journal:                      | <i>BMJ Open</i>                                                                                                                                                                                                                                                                                                                                                                                                                                                                           |
| Manuscript ID                 | bmjopen-2019-035610                                                                                                                                                                                                                                                                                                                                                                                                                                                                       |
| Article Type:                 | Protocol                                                                                                                                                                                                                                                                                                                                                                                                                                                                                  |
| Date Submitted by the Author: | 07-Nov-2019                                                                                                                                                                                                                                                                                                                                                                                                                                                                               |
| Complete List of Authors:     | Ogura Dantas, Lucas; Federal University of Sao Carlos, Physiotherapy Jorge, Ana Elisa; Federal University of Sao Carlos, Physiotherapy Serrao, Paula; Federal University of Sao Carlos, Physiotherapy Sendín, Francisco; Universidad de Córdoba, 2Sociosanitary Sciences, Radiology and Physical Medicine, University of Córdoba, Córdoba, Spain and Instituto Maiomónides de Investigación Biomédica de Córdoba (IMIBIC) Salvini, Tania; Federal University of Sao Carlos, Physiotherapy |
| Keywords:                     | PAIN MANAGEMENT, REHABILITATION MEDICINE, PUBLIC HEALTH                                                                                                                                                                                                                                                                                                                                                                                                                                   |
|                               |                                                                                                                                                                                                                                                                                                                                                                                                                                                                                           |

SCHOLARONE™  
Manuscripts

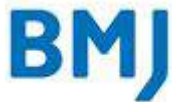

I, the Submitting Author has the right to grant and does grant on behalf of all authors of the Work (as defined in the below author licence), an exclusive licence and/or a non-exclusive licence for contributions from authors who are: i) UK Crown employees; ii) where BMJ has agreed a CC-BY licence shall apply, and/or iii) in accordance with the terms applicable for US Federal Government officers or employees acting as part of their official duties; on a worldwide, perpetual, irrevocable, royalty-free basis to BMJ Publishing Group Ltd ("BMJ") its licensees and where the relevant Journal is co-owned by BMJ to the co-owners of the Journal, to publish the Work in this journal and any other BMJ products and to exploit all rights, as set out in our [licence](#).

The Submitting Author accepts and understands that any supply made under these terms is made by BMJ to the Submitting Author unless you are acting as an employee on behalf of your employer or a postgraduate student of an affiliated institution which is paying any applicable article publishing charge ("APC") for Open Access articles. Where the Submitting Author wishes to make the Work available on an Open Access basis (and intends to pay the relevant APC), the terms of reuse of such Open Access shall be governed by a Creative Commons licence – details of these licences and which [Creative Commons](#) licence will apply to this Work are set out in our licence referred to above.

Other than as permitted in any relevant BMJ Author's Self Archiving Policies, I confirm this Work has not been accepted for publication elsewhere, is not being considered for publication elsewhere and does not duplicate material already published. I confirm all authors consent to publication of this Work and authorise the granting of this licence.

1  
2  
3 **TITLE: CRYOTHERAPY ASSOCIATED WITH TAILORED LAND-BASED EXERCISES**  
4 **FOR INDIVIDUALS WITH KNEE OSTEOARTHRITIS: A PROTOCOL FOR A**  
5 **RANDOMIZED TRIAL**  
6  
7  
8  
9

10  
11  
12 Lucas Ogura Dantas<sup>1</sup>, PT; Ana Elisa Serafim Jorge<sup>1</sup>, PT, MSc, PhD; Paula Regina Mendes Silva  
13  
14 Serrao<sup>1</sup>, PT, MSc, PhD; Francisco Albuquerque-Sendín<sup>2</sup>, PT, MSc, PhD; Tania Fatima Salvini<sup>1</sup>,  
15  
16 PT, MSc, PhD.  
17  
18

19  
20  
21 **Author Affiliations:** <sup>1</sup>Physical Therapy Department, Federal University of São Carlos, São  
22  
23 Carlos, Brazil. <sup>2</sup>Sociosanitary Sciences, Radiology and Physical Medicine, University of Córdoba,  
24  
25 Córdoba, Spain and Instituto Maiomónides de Investigación Biomédica de Córdoba (IMIBIC),  
26  
27 Córdoba, Spain. <sup>3</sup>Physical Therapy Division, University of Brasilia, Brasília, Distrito Federal,  
28  
29 Córdoba, Spain. <sup>3</sup>Physical Therapy Division, University of Brasilia, Brasília, Distrito Federal,  
30  
31 Brazil.  
32  
33  
34

35 **Corresponding Author:** Tania Fatima Salvini, PT, MSc, PhD. Neuromuscular Plasticity  
36  
37 Laboratory, Physical Therapy Department, Federal University of São Carlos, Rodovia Washington  
38  
39 Luiz, Km 235, CEP:13.565-905, CxP: 676, São Carlos, SP, Brazil ([tania@ufscar.br](mailto:tania@ufscar.br))  
40  
41  
42  
43  
44  
45  
46  
47  
48  
49  
50  
51  
52  
53  
54  
55  
56  
57  
58  
59  
60

## ABSTRACT

**Introduction:** There is an unmet need to develop new strength therapeutic exercises (STE) protocols using different treatment durations, frequencies, modalities, and intensities for individuals with knee osteoarthritis (KOA). Cryotherapy has been widely used as adjunct treatment for clinical improvement in individuals with KOA due its effects on pain and inflammation process. However, there are still disagreements in its recommendation by some prestigious KOA guidelines. The aim of this study was to verify the complementary effects of cryotherapy when associated with a STE protocol on patients with KOA. **Methods and analysis:** Placebo-controlled randomized trial with concealed allocation and intention-to-treat analysis. A baseline assessment will be performed before the 8-week intervention period, and a post-intervention assessment right after the last session. To check for residual effects of the interventions applied, a three- and a six-month follow-up will be performed. Participants will be people living in the community with KOA. There will be three groups: (1) the experimental group that will receive a tailored STE protocol and after, a cryotherapy session of 20 minutes; (2) the sham control group that will receive the same regimen but with sham packs filled with sand; and (3) the active treatment control group that will receive only the STE protocol. The primary outcome will be pain intensity according to a visual analogue scale. Secondary outcomes will be changes according to the Western Ontario & McMaster Universities Osteoarthritis; the Short-Form 36 questionnaire; the 30-Second Chair Stand Test; the Stair test; and the 40-meter fast paced walk test. **Ethics and dissemination:** The trial was approved by the Institutional Ethics Committee of Federal University of Sao Carlos, São Paulo, Brazil. Registration approval number: CAAE: 65966617.9.0000.5504. The results will be expected to be published in peer-reviewed journals.

**Trial registration number:** NCT03360500

**Strengths and limitations of this study:**

- The trial will be conducted following well-established reporting guidelines to improve the evidence synthesis regarding this topic. The methodology is designed to minimise bias by including concealed treatment allocation, and blinding of the outcome assessor and biostatistician.
- Participants will present radiographically confirmed knee osteoarthritis and a sufficient level of pain to ensure ample scope for improvement.
- The therapist who will deliver cryotherapy or the placebo intervention, and the patients will not be blinded. Although this may have resulted in bias, given the study design, a method of blinding patients and therapists to thermal agents has yet to be established.

1  
2  
3 Knee osteoarthritis (KOA) is a serious disease with a high societal and economic burden,<sup>1</sup> affecting  
4 approximately 250 million people worldwide.<sup>2</sup> Current clinical practice guidelines recommend a  
5 combination of pharmacological<sup>3</sup> and non-pharmacological<sup>4</sup> treatment strategies to manage KOA  
6 symptoms, and to improve patient's quality of life (QoL). However, pharmacological treatment  
7 options remain limited, poorly tolerated, with frequent toxicities,<sup>5,6</sup> and misused by patients.<sup>7</sup>

8  
9  
10  
11  
12  
13  
14  
15  
16  
17 Physical Therapy, specifically the use of strength therapeutic exercises (STE) protocols, is a well-  
18 established treatment for KOA, since it can relieve pain, reduce stiffness, improve physical  
19 function, and ultimately ameliorate quality of life.<sup>1,8</sup> There is high-quality evidence demonstrating  
20 that the benefits of STE protocols for pain and quality of life are sustained for at least two to six  
21 months after the end of a treatment for individuals with KOA<sup>8</sup>. Therefore, there is no need for new  
22 studies to demonstrate the effectiveness of STE for KOA patients.<sup>9</sup> However, there is a call for  
23 further research to develop novel insights within STE protocols regarding different treatment  
24 durations, frequencies, modalities (types), and intensities.<sup>10</sup> The majority of the current protocols  
25 have low exercise adherence and are substantially under-utilized by KOA patients mainly due to  
26 their beliefs, socioeconomical barriers, fear of movement, and early treatment pain  
27 aggravation.<sup>11,12</sup> These barriers create an unmet need for science-based STE protocols that are  
28 tailored and cost-effective for KOA patients and that can help clinicians to target rehabilitation.

29  
30  
31  
32  
33  
34  
35  
36  
37  
38  
39  
40  
41  
42  
43  
44  
45  
46  
47 Associated with therapeutic exercises, many physical modalities such as thermal agents, laser  
48 therapy, therapeutic ultrasound, and electrical stimulation have been used as adjunct treatments for  
49 clinical improvement in individuals with KOA.<sup>4,13</sup> Cryotherapy, a non-pharmacological  
50 intervention, has been widely used in some rheumatic joint diseases<sup>14,15</sup> for its effects on pain,  
51  
52  
53  
54  
55  
56  
57  
58  
59  
60

1  
2  
3 inflammation and oedema.<sup>16,17</sup> It is considered safe, inexpensive, and easy to administer for  
4  
5 healthcare professionals and patients. Moreover, it can be prescribed in isolation or as a  
6  
7 complementary treatment<sup>15</sup>, and seems to be well accepted by KOA individuals.<sup>18,19</sup> However,  
8  
9 although cryotherapy is recommended as a treatment option by some international KOA  
10  
11 guidelines,<sup>20,21</sup> others found insufficient evidence to support it.<sup>22–24</sup> Mainly due to methodological  
12  
13 limitations, relevant systematic reviews conclude that further trials are needed to evaluate  
14  
15 cryotherapy effects on pain, function, and quality of life in individuals with KOA.<sup>17,25,26</sup>  
16  
17  
18  
19  
20  
21

22 In this study, we aim to design a randomized trial to verify the complementary effects of  
23  
24 cryotherapy associated with a tailored STE protocol intervention for pain, function, and quality of  
25  
26 life in individuals with KOA. The proposed trial will contribute with new evidence to target KOA  
27  
28 rehabilitation, help pain management, and thereby improve physical function and quality of life of  
29  
30 these patients. The STE protocol described on this study was developed by our research group and  
31  
32 was also used in another randomized trial testing the complementary effects of low-level laser  
33  
34 therapy in individuals with KOA (trial registration number: U1111-1215-6510).  
35  
36  
37  
38  
39

## 40 **METHODS**

41  
42 To report this study protocol, we followed the Standard Protocol Items: Recommendations for  
43  
44 Interventional Trials (SPIRIT),<sup>27</sup> the Osteoarthritis Research Society International clinical trials  
45  
46 recommendations: design, conduct and reporting of clinical trials for knee osteoarthritis,<sup>28</sup> and the  
47  
48 Template for Intervention Description and Replication checklist (TIDieR).<sup>29</sup> The randomized trial  
49  
50 developed using this protocol, will be reported according to the Consolidated Standards of  
51  
52  
53  
54  
55  
56  
57  
58  
59  
60



1  
2  
3 Reporting Trials (CONSORT) statement for randomized trials of non-pharmacologic treatments.<sup>30</sup>  
4  
5 The trial is registered on clinicaltrials.gov (NCT03360500) platform.  
6  
7  
8  
9

### 10 **Study design and setting**

11  
12 This will be a placebo-controlled randomized clinical trial. A baseline assessment (A1) will be  
13 performed on the weekday before the 8-week intervention period, and a post-intervention  
14 assessment (A2) right after the last session. To check for residual effects of the interventions, a  
15 three-month (A3) and six-month (A4) follow-up assessment will be performed. Each patient will  
16 be assessed in the same period of the day in a physiotherapy research laboratory by the same  
17 assessor. To reduce bias, the therapists responsible for applying the intervention and the outcomes  
18 assessor will follow standardized scripts to give explanations regarding the general objective of  
19 the study.<sup>28</sup> Moreover, prior to the beginning of the study, the therapists responsible for the  
20 intervention will participate in a 10-hour training module, which will consist of scientific  
21 information and clinical training regarding KOA, the STE protocol, and the use of the cryotherapy.  
22 Intervention adherence, medication intake and adverse events will be tracked with an 8-week  
23 assessment diary given to the participants at baseline assessment and with a 12-week assessment  
24 diary for the three-month follow-up assessment. All the participants will be advised to not practice  
25 any other type of regular physical exercises during the study protocol that could interfere with the  
26 STE protocol. A verbal and written explanation of the objectives and methodology of the study  
27 will be provided to all the participants, and those willing to participate will sign a written informed  
28 consent form, approved by the local ethics committee. A detailed timeline of the trial is presented  
29 on **Table 1**.  
30  
31  
32  
33  
34  
35  
36  
37  
38  
39  
40  
41  
42  
43  
44  
45  
46  
47  
48  
49  
50  
51  
52  
53  
54  
55  
56  
57  
58  
59  
60

## Patient and Public Involvement

The patients and public were not involved in planning and design of this study.

## Participants

Participants will be recruited through public announcements on social media, advertisements via local news, University community newsletters, and banners or leaflets posted at strategic locations at the city. People who express interest in participating in the study will undergo first a screening process to check eligibility criteria, and after a lateral, anteroposterior, and axial radiography of both knees to determine KOA severity. All individuals will be classified with KOA based on the clinical and radiographic criteria of the American College of Rheumatology.<sup>31</sup> Participants will be required to have symptoms and a radiographic grade (Kellgren and Lawrence scale) of  $\geq 2$  (at least mild radiographic OA) in at least one knee compartment.<sup>28</sup> To be included in the study, participants will also need to: be aged between 40 and 75 years; be engaged in less than 45 minutes/week in accumulated physical activity of at least moderate intensity<sup>32</sup>; have a body mass index  $< 35 \text{ kg/m}^2$ ; and pain intensity in the prior week of  $\geq 4$  cm on a 10-cm visual analogue scale.<sup>28</sup> Exclusion criteria will comprise: physical therapy in the prior 3 months; intra-articular knee injections in the prior 6 months; medical restrictions such as cardiorespiratory, neurological or any other rheumatology conditions; previous hip, knee or ankle surgery; and any other chronic condition that leads to chronic pain or dysfunction. All the participants will be asked to provide a medical certificate stating to be healthily able to perform physical activities.

## Interventions

The interventions will be administered by physical therapists in the physiotherapy clinic of the university. The sessions will last 90-minutes and will take place over a period of eight weeks, three times per week in nonconsecutive days, totaling 24 sessions. All the participants will perform the STE protocol and after, according to the random allocation, cryotherapy or sham will be administered in individual rooms for each patient.

### STE protocol

The 8-week land-based supervised exercise protocol was designed according to the recommendations and guidelines of evidence-based practices and specific randomized clinical trials of physical exercise intervention for KOA.<sup>33,34</sup> The STE protocol characteristics are described in **Figure 1** and a detailed description of all the exercises is presented in the **Supplementary file** of this protocol. The protocol is divided into two cycles. Each cycle consists of 4 weeks of progressive exercises, with tailored intensity for each participant, that is performed 3 times per week in non-consecutive days, with 24 hours rest between sessions. The first session is used to demonstrate and explain the STE protocol, and to perform an exercise familiarization using no loads by the participants. The second session is destined to estimate the initial resistance of each participant for each exercise. The volitional interruption method is used in order to achieve the benefits of a resistance training and to provide a low risk of musculoskeletal injuries to the participants.<sup>35</sup> The loads are gradually increased until the participant is able to adequately perform 12 repetitions with no voluntarily interruption due to muscle fatigue.

The STE protocol sessions consist of three phases. The first phase is a 10-minute warm-up in which the patients can choose, according to their preferences, to walk in a comfortable intensity in

1  
2  
3 an outdoor circuit, treadmill or ride in a stationary bicycle. The second phase consists of 40 minutes  
4  
5 of strengthening exercises (resistance training), such as lower limb, trunk muscles, and  
6  
7 neuromuscular training involving balance exercises. The third phase is a cool-down phase,  
8  
9 consisting of static stretching exercises to potentially reduce musculoskeletal injuries and to  
10  
11 maximize the benefit of the STE protocol.<sup>36</sup> To ensure patient safety, cardiac and respiratory  
12  
13 frequencies and blood pressure are monitored at the beginning of each session or if the participant  
14  
15 presents an intense rate of perceived exertion according to the Borg scale while performing an  
16  
17 exercise.<sup>37,38</sup>  
18  
19  
20  
21  
22  
23

#### 24 *Cryotherapy protocol*

25  
26 To apply cryotherapy, the therapist will explain to the patient that the intervention will consist of  
27  
28 crushed ice applied to the more-affected knee for 20 minutes. Participants will be positioned in  
29  
30 dorsal decubitus with both legs extended and relaxed. To protect the skin from possible frostbite,  
31  
32 the entire knee surface will be covered with a moist surgical gauze (45 × 50 × 0.01 cm). Next, two  
33  
34 plastic bags (24 × 34 × 0.08 cm), each containing 1 kg of crushed ice, will be placed on the knee,  
35  
36 covering the anterior, posterior, medial and lateral surfaces. A comfortable, non-painful  
37  
38 compression will be applied over the ice packs by wrapping an elastic bandage around them, and  
39  
40 the therapy will be left in situ for 20 uninterrupted minutes. The main purposes of compression is  
41  
42 to maintain the ice packs in position on the knee<sup>39</sup> and to enhance cryotherapy effects.<sup>40</sup>  
43  
44  
45  
46

47 For the cryotherapy sham intervention, the bags will be filled with 1 kg of dry sand instead of ice.  
48  
49 The sand bags will be applied according to the same regimen in the same locations. The therapist's  
50  
51 explanation about the intervention will be changed to mention 'application of sand packs' instead  
52  
53  
54  
55  
56  
57  
58  
59

1  
2  
3 of 'cryotherapy application'. The sand packs will be applied with the same gauze underneath and  
4  
5 the same bandage for compression.  
6  
7  
8  
9

## 10 **Outcome measures**

11  
12 All the outcomes will be measured by the same blinded assessor before and after the intervention,  
13  
14 and at the 3- and 6-month follow-up periods. **Table 2** describes the main outcome measures that  
15  
16 will be included on the trial and the recommended estimate of the minimum clinically important  
17  
18 difference (MCID) for each outcome measure. We will measure pain intensity, knee subjective  
19  
20 and objective physical function, and quality of life.  
21  
22  
23  
24  
25

### 26 *Primary outcome*

27  
28 The primary outcome will be pain intensity at rest assessed with a visual analogue scale. This self-  
29  
30 reported pain score is a valid and reliable measure for KOA.<sup>41</sup> The visual analogue scale will be  
31  
32 administered at baseline, on the final assessment day, and at the 3- and 6-months follow-up periods.  
33  
34  
35  
36  
37

### 38 *Secondary outcomes*

39  
40 To subjectively assess physical function and associated problems the Western Ontario &  
41  
42 McMaster Universities Osteoarthritis (WOMAC) will be used. The Short-Form 36 (SF-36)  
43  
44 questionnaire will be used to assess quality of life. Three objective physical function tests will also  
45  
46 be used: The 30-Second chair stand test, the stair test, and the 40-meter fast paced walk test.  
47  
48  
49  
50  
51  
52  
53  
54  
55  
56  
57  
58  
59  
60

## Randomization

Eligible patients who consent to participate will be randomly allocated into 3 groups of 40: (1) active control group that will receive the STE protocol only, (2) STE + cryotherapy group, and (3) STE + sham cryotherapy group. Random allocations will be determined by a computer-generated random numbers program and matched for gender (20 men and 20 women in each group). Allocation will be concealed, and the random allocations will be placed in opaque sealed envelopes that will be locked in a central location. Each participant's random allocation will be revealed just before the intervention start.<sup>28</sup>

## Sample size

We aimed to detect a minimum clinically important differences (MCID) of 1.75 cm units on the visual analogue scale.<sup>42</sup> In addition, we aimed to detect an MCID of 30 points on the WOMAC global score.<sup>43</sup> Calculations were based on an analysis of covariance adjusting for baseline outcome scores, assuming between-patient standard deviations of 2.0 cm for pain and 45 points for WOMAC global score. Based on these criteria, to achieve a significance level of 0.05 and a power of 0.80%, 37 participants with KOA were required in each group. To allow possible dropouts during the intervention period, 40 participants were recruited per group.

## Data analysis

The analyses will be performed by a blinded biostatistician using commercial software. The Kolmogorov-Smirnov test will be applied to evaluate the normality of data distribution. If the distribution is not normal, non-parametric tests will be used. For normal distributions, a 2-factor analysis of variance (ANOVA) will be conducted for the primary outcome (visual analogue scale

1  
2  
3 for pain) and secondary outcomes, with time (baseline, post-intervention, and follow-up) as the  
4 within-subject factor and group (STE, STE + cryotherapy, STE + sham cryotherapy) as the  
5 between-subject factor. In addition, tukey's test will be used for post-hoc analysis when necessary  
6 and an intention-to-treat analysis will be performed for all randomized participants. All the missing  
7 data will be replaced using the expectation maximization method. Between-group differences and  
8 their 95% confidence intervals will be reported and interpreted against the nominated thresholds  
9 for MCID. For outcomes where the MCID are not nominated, Cohen's *d* coefficient will be  
10 calculated to aid interpretation. An effect size greater than 0.8 will be considered large, around 0.5  
11 moderate, and less than or equal to 0.2, small<sup>44</sup>.  
12  
13  
14  
15  
16  
17  
18  
19  
20  
21  
22  
23  
24  
25  
26  
27  
28  
29  
30  
31  
32  
33  
34  
35  
36  
37  
38  
39  
40  
41  
42  
43  
44  
45  
46  
47  
48  
49  
50  
51  
52  
53  
54  
55  
56  
57  
58  
59  
60

## **ETHICS AND DISSEMINATION**

All participants will provide written informed consent following verbal and written explanation of the study protocol and the opportunity to ask questions. Participants are free to withdraw from the trial at any time without prejudice to future treatment. Results will be presented at scientific meetings and published in peer-reviewed journals. All publications and presentations related to the study will be authorized and reviewed by the study investigators.

## **TRIAL STATUS**

The trial is currently recruiting and is expected to be completed (including follow-up testing) by June 2020.

## **AUTHORS CONTRIBUTION**

L.O.D., A.E.S.J., P.R.S., F.A.S., and T.F.S. designed the study protocol. L.O.D. wrote the first draft of the manuscript and together with A.E.S.J., P.R.S., F.A.S., and T.F.S. revised and produced the final version. All authors have read and approved the final version of the manuscript. L.O.D. takes responsibility for the integrity of the work as a whole.

## **FUNDING**

LOD and AESJ were financially supported by Sao Paulo Research Foundation (FAPESP, Process numbers #2018/23705-3, and #2017/00062-7 respectively) and Conselho Nacional de Desenvolvimento Científico e Tecnológico (CNPQ # 401333/2016-7).



## **DISCLAIMER**

The study funders have had no role in study design; collection, management, analysis and interpretation of data; writing of the report; or the decision to submit the report for publication, and do not own ultimate authority over any of these activities.

## **COMPETING INTERESTS**

All authors have completed a uniform disclosure form and declare no conflicts of interest

## **ETHICS APPROVAL**

The trial was approved by the Institutional Ethics Committee of Federal University of Sao Carlos, São Paulo, Brazil. Registration approval number: CAAE: 65966617.9.0000.5504. All participants will be asked to give written informed consent before data collection began. The trial will be conducted according to the Helsinki Statement.

## REFERENCES

1. Hunter DJ, Bierma-Zeinstra S. Osteoarthritis. *Lancet (London, England)*. 2019;393(10182):1745-1759. doi:10.1016/S0140-6736(19)30417-9
2. Vos T, Flaxman AD, Naghavi M, et al. Years lived with disability (YLDs) for 1160 sequelae of 289 diseases and injuries 1990–2010: a systematic analysis for the Global Burden of Disease Study 2010. *Lancet*. 2012;380(9859):2163-2196. doi:10.1016/S0140-6736(12)61729-2
3. Mandl LA. Osteoarthritis year in review 2018: clinical. *Osteoarthr Cartil*. 2018;(xxxx):1-6. doi:10.1016/j.joca.2018.11.001
4. Collins NJ, Hart HF, Mills KAG. OARSI year in review 2018: rehabilitation and outcomes. *Osteoarthr Cartil*. 2018;0(0). doi:10.1016/j.joca.2018.11.010
5. Volkow ND, McLellan AT. Opioid Abuse in Chronic Pain — Misconceptions and Mitigation Strategies. *N Engl J Med*. 2016;374(13):1253-1263. doi:10.1056/NEJMra1507771
6. Deveza LA, Hunter DJ, Van Spil WE. Too much opioid, too much harm. *Osteoarthr Cartil*. 2018;26(3):293-295. doi:10.1016/j.joca.2017.12.003
7. Vowles KE, Mcintee ML, Siyahhan P, Frohe T, Ney JP, Goes DN Van Der. Rates of opioid misuse, abuse, and addiction in chronic pain: a systematic review and data synthesis. *Pain*. 2015;156(4). <http://www.nejm.org/doi/10.1056/NEJMra1507771>.
8. Fransen M, McConnell S, Ar H, M VDE, Simic M, Kl B. Exercise for osteoarthritis of the knee. *Cochrane Libr*. 2015;(1):1-144. doi:10.1002/14651858.CD004376.pub3.[www.cochranelibrary.com](http://www.cochranelibrary.com)
9. Verhagen AP, Ferreira M, Vendel EAER De, et al. Do we need another trial on exercise in patients with knee osteoarthritis? *Osteoarthr Cartil*. 2019;27(xxxx):1266-1269. doi:10.1016/j.joca.2019.04.020
10. Lee AC, Harvey WF, Price LL, et al. Dose-Response Effects of Tai Chi and Physical Therapy Exercise Interventions in Symptomatic Knee Osteoarthritis. *PM&R*. 2018;10(7):712-723. doi:10.1016/j.pmrj.2018.01.003
11. Nicolson PJA, Bennell KL, Dobson FL, Van Ginckel A, Holden MA, Hinman RS. Interventions to increase adherence to therapeutic exercise in older adults with low back pain and/or hip/knee osteoarthritis: a systematic review and meta-analysis. *Br J Sports Med*. 2017;51(10):791-799. doi:10.1136/bjsports-2016-096458
12. Dobson F, Bennell KL, French SD, et al. Barriers and Facilitators to Exercise Participation in People with Hip and/or Knee Osteoarthritis. *Am J Phys Med Rehabil*. 2016;95(5):1. doi:10.1097/phm.0000000000000448
13. Oo WM, Thae Bo M. Efficacy of Physical Modalities in Knee Osteoarthritis: Recent Recommendations. *Int J Phys Med Rehabil*. 2016;04(03):3-4. doi:10.4172/2329-9096.1000e112
14. Demoulin C, Vanderthommen M. Cryotherapy in rheumatic diseases. *Jt Bone Spine*. 2012;79(2):117-118. doi:10.1016/j.jbspin.2011.09.016
15. Guillot X, Tordi N, Mourot L, et al. Cryotherapy in inflammatory rheumatic diseases: A systematic review. *Expert Rev Clin Immunol*. 2014;10(2):281-294. doi:10.1586/1744666X.2014.870036
16. Bleakley CM, Davison GW. Cryotherapy and inflammation: evidence beyond the cardinal signs. *Phys Ther Rev*. 2010. doi:10.1179/1743288X10Y.0000000014

17. Dantas LO, Moreira R de FC, Norde FM, Mendes Silva Serrao PR, Albuquerque-Sendin F, Salvini TF. The effects of cryotherapy on pain and function in individuals with knee osteoarthritis: a systematic review of randomized controlled trials. *Clin Rehabil*. 2019;026921551984040. doi:10.1177/0269215519840406
18. Porcheret M, Jordan K, Jinks C. Primary care treatment of knee pain - A survey in older adults. *Rheumatology*. 2007;46(11):1694-1700. doi:10.1093/rheumatology/kem232
19. Denegar CR, Dougherty DR, Friedman JE, et al. Preferences for heat, cold, or contrast in patients with knee osteoarthritis affect treatment response. *Clin Interv Aging*. 2010;5:199-206. doi:10.2147/CIA.S11431
20. Chae KJ, Choi MJ, Kim KY, Ajayi FF, Chang IS, Kim IS. National Institute for Health and Care Excellence. Osteoarthritis: Care and Management. December 2014.
21. Hochberg MC, Altman RD, April KT, et al. American College of Rheumatology 2012 recommendations for the use of nonpharmacologic and pharmacologic therapies in osteoarthritis of the hand, hip, and knee. *Arthritis Care Res*. 2012;64(4):465-474. doi:10.1002/acr.21596
22. McAlindon TE, Bannuru RR, Sullivan MC, et al. OARSI guidelines for the non-surgical management of knee osteoarthritis. *Osteoarthr Cartil*. 2014;22(3):363-388. doi:10.1016/j.joca.2014.01.003
23. Fernandes L, Hagen KB, Bijlsma JWJJ, et al. EULAR recommendations for the non-pharmacological core management of hip and knee osteoarthritis. *Ann Rheum Dis*. 2013;72(7):1125-1135. doi:10.1136/annrheumdis-2012-202745
24. Brosseau L, Taki J, Desjardins B, et al. The Ottawa panel clinical practice guidelines for the management of knee osteoarthritis. Part two: Strengthening exercise programs. *Clin Rehabil*. 2017;31(5):596-611. doi:10.1177/0269215517691084
25. Brosseau L, Yonge K a, Robinson V, et al. Thermotherapy for treatment of osteoarthritis. *Cochrane Database Syst Rev*. 2003;(4):CD004522. doi:10.1016/S0031-9406(05)60490-7
26. King J, De G, Brosseau L, et al. A systematic critical appraisal for non-pharmacological management of osteoarthritis using the appraisal of guidelines research and evaluation II instrument. *PLoS One*. 2014;9(1). doi:10.1371/journal.pone.0082986
27. Chan A-W, Tetzlaff JM, Altman DG, et al. SPIRIT 2013 Statement: Defining Standard Protocol Items for Clinical Trials. *Ann Intern Med*. 2013;158(3):200. doi:10.7326/0003-4819-158-3-201302050-00583
28. McAlindon TE, Driban JB, Henrotin Y, et al. OARSI Clinical Trials Recommendations: Design, conduct, and reporting of clinical trials for knee osteoarthritis. *Osteoarthr Cartil*. 2015;23(5):747-760. doi:10.1016/j.joca.2015.03.005
29. Hoffmann TC, Glasziou PP, Boutron I, et al. Better reporting of interventions: template for intervention description and replication (TIDieR) checklist and guide. *BMJ*. 2014;348(mar07\_3):g1687. doi:10.1136/bmj.g1687
30. Barbour V, Bhui K, Chescheir N, et al. CONSORT Statement for randomized Trials of nonpharmacologic treatments: A 2017 update and a CONSORT extension for nonpharmacologic Trial Abstracts. *Ann Intern Med*. 2017;167(1):40-47. doi:10.7326/M17-0046
31. Altman R, Asch E, Bloch D, et al. Development of criteria for the classification and reporting of osteoarthritis. Classification of osteoarthritis of the knee. Diagnostic and Therapeutic Criteria Committee of the American Rheumatism Association. *Arthritis Rheum*. 1986;29(8):1039-1049. doi:10.1002/art.1780290816

32. Dunlop DD, Song J, Lee J, et al. Physical Activity Minimum Threshold Predicting Improved Function in Adults With Lower-Extremity Symptoms. *Arthritis Care Res.* 2017;69(4):475-483. doi:10.1002/acr.23181
33. Messier SP, Mihalko SL, Beavers DP, et al. Strength training for arthritis trial (START): Design and rationale. *BMC Musculoskelet Disord.* 2013;14(1):1. doi:10.1186/1471-2474-14-208
34. Fransen M, McConnell S, Harmer AR, Van Der Esch M, Simic M, Bennell KL. Exercise for osteoarthritis of the knee: A Cochrane systematic review. *Br J Sports Med.* 2015;49(24):1554-1557. doi:10.1136/bjsports-2015-095424
35. Nóbrega SR, Ugrinowitsch C, Pintanel L, Barcelos C, Libardi CA. Effect of Resistance Training to Muscle Failure vs. Volitional Interruption at High- and Low-Intensities on Muscle Mass and Strength. *J Strength Cond Res.* 2018;32(1):162-169. doi:10.1519/JSC.0000000000001787
36. Bennell KL, Dobson F, Hinman RS. Exercise in osteoarthritis: Moving from prescription to adherence. *Best Pract Res Clin Rheumatol.* 2014;28(1):93-117. doi:10.1016/j.berh.2014.01.009
37. American Geriatrics Society Panel on Exercise and Osteoarthritis. Exercise prescription for older adults with osteoarthritis pain: consensus practice recommendations. A supplement to the AGS Clinical Practice Guidelines on the management of chronic pain in older adults. *Jags.* 2001;49(6):808-823. doi:10.1046/j.1532-5415.2001.00496.x
38. Vincent KR, Vincent HK. Resistance exercise for knee osteoarthritis. *PM R.* 2012;4(5 Suppl):S45-52. doi:10.1016/j.pmrj.2012.01.019
39. Silva P, Lott R, Wickrama S, Mota J, Welk G. Elastic Bandaging for Orthopedic and Sports Injuries Prevention and Rehabilitation: A Systematic Review. *Int J Sport Nutr Exerc Metab.* 2016;32:1-44. doi:10.1123/ijssp.2015-0012
40. Song M, Sun X, Tian X, et al. Compressive cryotherapy versus cryotherapy alone in patients undergoing knee surgery: a meta-analysis. *Springerplus.* 2016;5(1):1-12. doi:10.1186/s40064-016-2690-7
41. Hawker G, Mian S, Kendzerska T, French M. Measures of adult pain: Visual Analog Scale for Pain (VAS Pain), Numeric Rating Scale for Pain (NRS Pain), McGill Pain Questionnaire (MPQ), Short-Form McGill Pain Questionnaire (SF-MPQ), Chronic Pain Grade Scale (CPGS), Short Form-36 Bodily Pain Scale (SF. *Arthritis Care Res.* 2011;63(SUPPL. 11):240-252. doi:10.1002/acr.20543
42. Bellamy N, Carette S, Ford P, et al. Osteoarthritis Antirheumatic Drug Trials. III. Setting the Delta for Clinical Trials--Results of a Consensus Development (Delphi) Exercise. *J Rheumatol* 19 (3),. 1992;3:451-457.
43. Fitzgerald GK, Fritz JM, Childs JD, et al. Exercise, manual therapy, and use of booster sessions in physical therapy for knee osteoarthritis: a multi-center, factorial randomized clinical trial. *Osteoarthr Cartil.* 2016;24(8):1340-1349. doi:10.1016/j.joca.2016.03.001
44. Cohen J. *Statistical Power Analysis for the Behavioral Sciences.* 2nd Editio. (Hillsdale NJ. LE, ed.); 1998.
45. Angst F, Aeschlimann A, Stucki G. Smallest detectable and minimal clinically important differences of rehabilitation intervention with their implications for required sample sizes using WOMAC and SF-36 quality of life measurement instruments in patients with osteoarthritis of the lower ex. *Arthritis Rheum.* 2001;45(4):384-391. doi:10.1002/1529-0131(200108)45:4<384::AID-ART352>3.0.CO;2-0

- 1  
2  
3 46. Roos EM, Toksvig-Larsen S. Knee injury and Osteoarthritis Outcome Score (KOOS) -  
4 validation and comparison to the WOMAC in total knee replacement. *Health Qual Life*  
5 *Outcomes*. 2003;1:17. doi:10.1186/1477-7525-1-17  
6  
7 47. Dobson F, Bennell KL, Hinman RS, Abbott JH, Roos EM. Recommended performance -  
8 based tests to assess physical function in people diagnosed with hip or knee osteoarthritis.  
9 *OARSI - Osteoarthr Res Soc Int*. 2013;1-26. doi:10.1016/j.joca.2013.05.002  
10  
11 48. Dobson F, Hinman RS, Roos EM, et al. OARSI recommended performance-based tests to  
12 assess physical function in people diagnosed with hip or knee osteoarthritis. *Osteoarthr*  
13 *Cartil*. 2013;21(8):1042-1052. doi:10.1016/j.joca.2013.05.002  
14  
15  
16  
17  
18  
19  
20  
21  
22  
23  
24  
25  
26  
27  
28  
29  
30  
31  
32  
33  
34  
35  
36  
37  
38  
39  
40  
41  
42  
43  
44  
45  
46  
47  
48  
49  
50  
51  
52  
53  
54  
55  
56  
57  
58  
59  
60

1  
2  
3 **Figure 1 Legend: Land Based Exercise Protocol Characteristics**  
4  
5  
6  
7  
8  
9  
10  
11  
12  
13  
14  
15  
16  
17  
18  
19  
20  
21  
22  
23  
24  
25  
26  
27  
28  
29  
30  
31  
32  
33  
34  
35  
36  
37  
38  
39  
40  
41  
42  
43  
44  
45  
46  
47  
48  
49  
50  
51  
52  
53  
54  
55  
56  
57  
58  
59  
60

For peer review only

**Table 1.**  
Detailed timeline of the measurements to be taken at each point on the trials

| <b>TIMELINE</b>      |                                  | <b>Enrolment</b>         | <b>STE protocol training</b> | <b>Baseline assessment (A1)</b> | <b>Intervention</b> | <b>Post-intervention assessment (A2)</b> | <b>Follow-up assessment (A3)</b> | <b>Follow-up assessment (A4)</b> |
|----------------------|----------------------------------|--------------------------|------------------------------|---------------------------------|---------------------|------------------------------------------|----------------------------------|----------------------------------|
|                      |                                  | -2 weeks (-14 to -7 day) | -1 week (-7 to 0 day)        | Day 0                           |                     | 8 weeks (±3 days)                        | 20 weeks (±3 days)               | 32 weeks (±3 days)               |
| <b>Enrolment</b>     | Eligibility screen               | <b>X</b>                 |                              |                                 |                     |                                          |                                  |                                  |
|                      | Informed consent                 | <b>X</b>                 |                              |                                 |                     |                                          |                                  |                                  |
| <b>Interventions</b> | Allocation                       |                          |                              | <b>X</b>                        |                     |                                          |                                  |                                  |
|                      | STE                              |                          |                              |                                 | <b>X</b>            |                                          |                                  |                                  |
|                      | STE + cryotherapy                |                          |                              |                                 | <b>X</b>            |                                          |                                  |                                  |
|                      | STE + sham cryotherapy           |                          |                              |                                 | <b>X</b>            |                                          |                                  |                                  |
|                      | X-ray examination of both knees  | <b>X</b>                 |                              |                                 |                     |                                          |                                  |                                  |
| <b>Assessments</b>   | VAS                              |                          |                              | <b>X</b>                        |                     | <b>X</b>                                 | <b>X</b>                         | <b>X</b>                         |
|                      | WOMAC                            |                          |                              | <b>X</b>                        |                     | <b>X</b>                                 | <b>X</b>                         | <b>X</b>                         |
|                      | KOOS                             |                          |                              | <b>X</b>                        |                     | <b>X</b>                                 | <b>X</b>                         | <b>X</b>                         |
|                      | SF-36                            |                          |                              | <b>X</b>                        |                     | <b>X</b>                                 | <b>X</b>                         | <b>X</b>                         |
|                      | Timed-up and Go Test             |                          |                              | <b>X</b>                        |                     | <b>X</b>                                 | <b>X</b>                         | <b>X</b>                         |
|                      | 30-Second Chair to Stand Test    |                          |                              | <b>X</b>                        |                     | <b>X</b>                                 | <b>X</b>                         | <b>X</b>                         |
|                      | Stair Climb Test                 |                          |                              | <b>X</b>                        |                     | <b>X</b>                                 | <b>X</b>                         | <b>X</b>                         |
|                      | 40m (4x10m) Fast Paced Walk Test |                          |                              | <b>X</b>                        |                     | <b>X</b>                                 | <b>X</b>                         | <b>X</b>                         |

STE: Strength Therapeutic Exercises; VAS: Visual Analogue Scale, WOMAC: Western Ontario & McMaster Universities Osteoarthritis questionnaire; KOOS: Knee Injury and Osteoarthritis Outcome Score; SF-36: Short Form-36 questionnaire.

A: Assessment



**Table 2.**

Detailed description of the study's outcome measures.

| Outcome measure                                                                 | Description of the test                                                                                                                                                                                                                                                                                                                                                                                                                | Scoring                                                                                                                                                | Minimum clinically important difference                                                                   |
|---------------------------------------------------------------------------------|----------------------------------------------------------------------------------------------------------------------------------------------------------------------------------------------------------------------------------------------------------------------------------------------------------------------------------------------------------------------------------------------------------------------------------------|--------------------------------------------------------------------------------------------------------------------------------------------------------|-----------------------------------------------------------------------------------------------------------|
| <b>Visual analogue scale</b>                                                    | The scale is placed in front of the patient who is asked to rate their pain intensity in the prior week. <sup>41</sup>                                                                                                                                                                                                                                                                                                                 | The scale ranges from 0 (no pain) to 10 cm (maximum pain intensity).                                                                                   | A pain reduction of 1.75 cm is recommended in OA research. <sup>42</sup>                                  |
| <b>Western Ontario &amp; McMaster Universities Osteoarthritis questionnaire</b> | This self-report questionnaire assesses the problems experienced by people with lower limb OA in the prior 72 hours. It contains 24 questions in 3 domains: pain, stiffness and physical function.                                                                                                                                                                                                                                     | Each question is scored from 0 to 4. The maximum score is 96. High scores indicate worse status.                                                       | An improvement of 12% from baseline is recommended in OA research. <sup>45</sup>                          |
| <b>Knee Injury and Osteoarthritis Outcome Score</b>                             | This self-report questionnaire assesses the problems experienced by people with lower limb OA in the prior week, by measuring quality of life and knee function. It contains 42 questions in 5 domains: pain; other symptoms; function in daily life; sports-related function and recreation; and knee-related quality of life.                                                                                                        | The answers are standardised and scored from 0 to 4. The total score is 168. High scores indicate worse status.                                        | A difference of 8 to 10 in the total score is recommended in OA research. <sup>46</sup>                   |
| <b>Stair Climb Test</b>                                                         | The participant is positioned in front of the stairs and, at the therapist signal, he/she has to climb the indicated steps (we used the 12-step SCT) and descend promptly, being able to use the handrail as a security instrument. We used 20 cm steps height, a handrail stair in an illuminated environment, free of traffic or external distractions. Moreover, a pre-test was conducted to identify the need for safety measures. | The final score was calculated based on the time the participant took to perform the test and compared to the normative values available for the test. | A reduction of 5.5 seconds in the test is the recommended MCID in OA research <sup>47</sup>               |
| <b>40m (4x10m) Fast Paced Walk Test</b>                                         | Administered at a distance of 10 meters (marked by tapes), a cone is placed 2 meters before the start and 2 meters after the end of each marking. The participant is instructed to walk as quickly but as safely as possible the first 10 meters (from the start mark), to turn around in the cone and walk back the 10 meters again, successively until completing the distance of 40 meters.                                         | Speed (m/s)                                                                                                                                            | An increase of 0.2-0.3 meters per second in the test is the recommended MCID in OA research <sup>47</sup> |
| <b>30-Second Chair to Stand Test</b>                                            | A chair with no arms is placed against a wall to prevent oscillations. Patients sit in the middle of the chair, with their back straight and feet resting on the floor in line with their shoulders. The participant is asked to rise from sitting to standing as many times as possible in 30 seconds.                                                                                                                                | Total number of repetitions within 30 seconds                                                                                                          | An increase of 2 to 3 repetitions is recommended in OA research. <sup>48</sup>                            |

OA: osteoarthritis



**Figure 1**

Legend: Land Based Exercise Protocol Characteristics

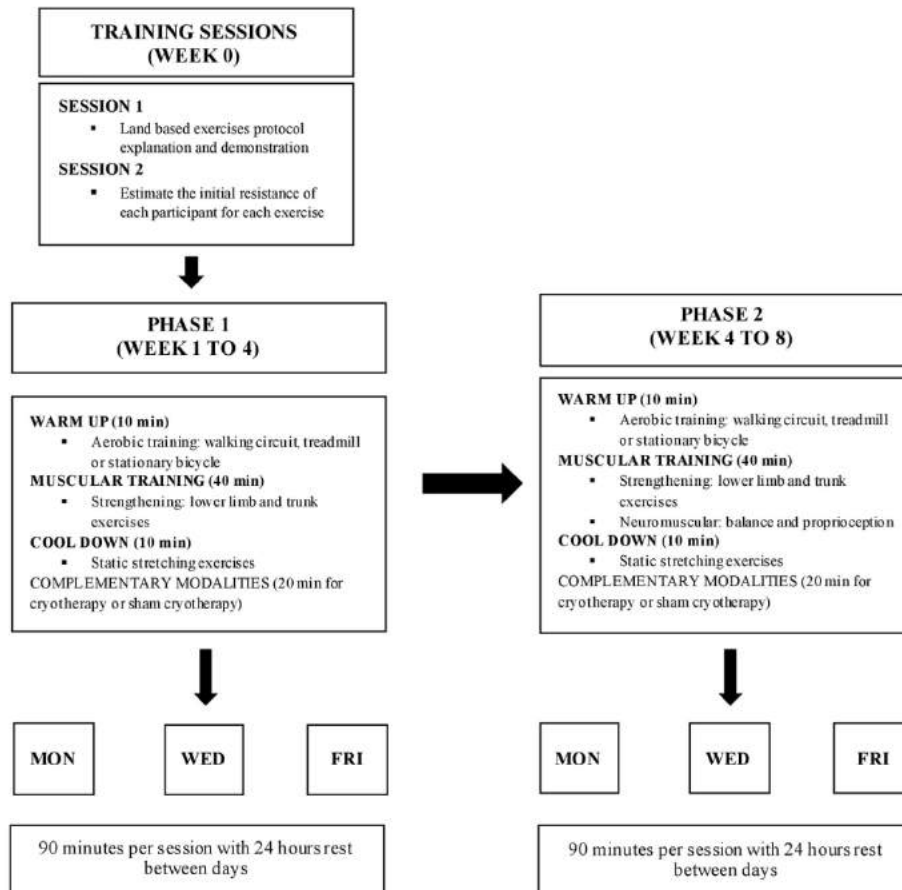

Land Based Exercise Protocol Characteristics

107x139mm (300 x 300 DPI)

# SUPPLEMENTARY FILE

## Land-Based Exercises Protocol for Patients with Knee Osteoarthritis

### Warm-up Phase (10 min)

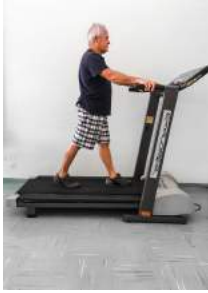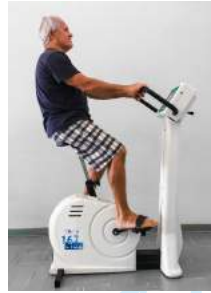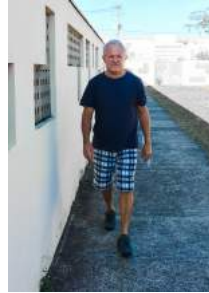

**Description: treadmill, stationary bicycle, or walking.**

Performed in a comfortable cardiorespiratory intensity aiming the joints mobility.

### Cool-down Phase (10 min)

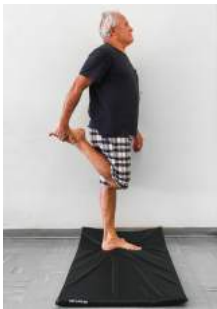

**Description: Quadriceps stretching.**

Active stretching performed with maximum tolerable range of motion.

**Set: 1 x 30 seconds**

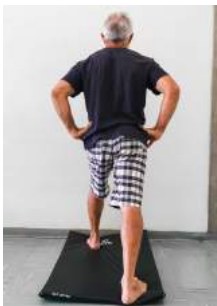

**Description: Gastrocnemius stretching.**

Active stretching performed with maximum tolerable range of motion.

**Set: 1 x 30 seconds**

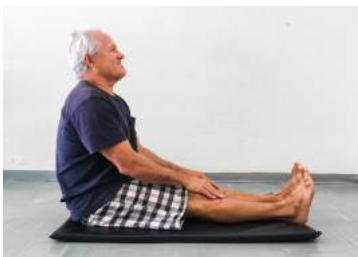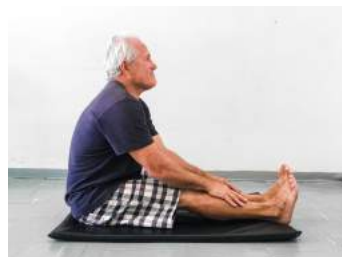

**Description: Hamstrings stretching.**

Active stretching performed with maximum tolerable range of motion.

**Set: 1 x 30 seconds**

# SUPPLEMENTARY FILE

## Conditioning PHASE 1

**A**

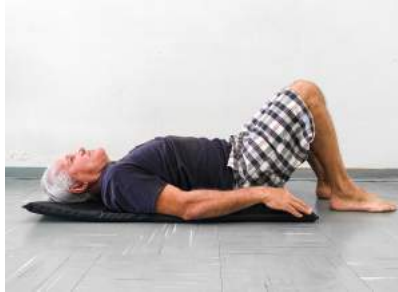

**B**

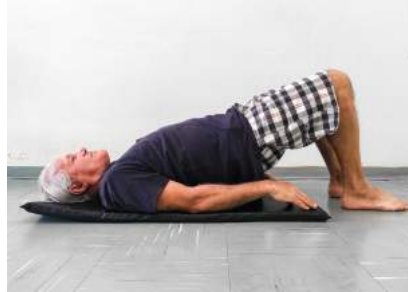

**Name: Bridge**

**Type: isometric**

**Position A:** lie down on the mat, knees pointing to the ceiling, knees aligned with hips.

**Position B:** raise your hips up toward the ceiling and hold for 15 up to 30 s.

**Sets:** 3 x 15-30 seconds

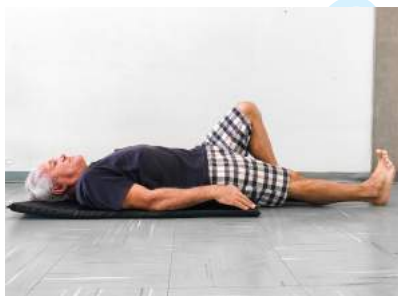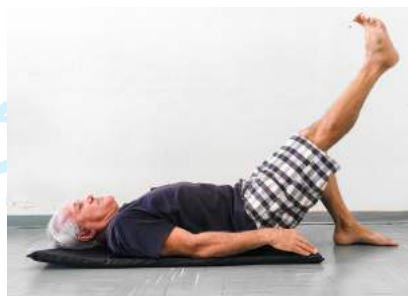

**Name: Straight Leg Raise (SLR) – hip flexion**

**Type: Isotonic**

**Position A:** lie down, one leg bent and another straight, pull up your foot.

**Position B:** raise your leg straight up until it is aligned with the other thigh, then slowly lower it down.

**Sets:** 3

**Repetitions:** 12

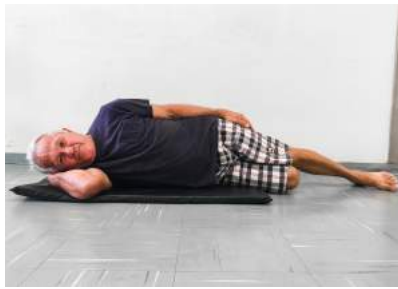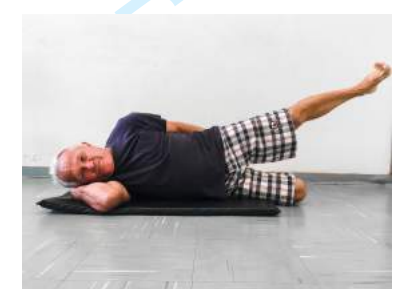

**Name: SLR – hip abduction**

**Type: Isotonic**

**Position A:** side lying position, bend the knee in contact with the floor and straight the other leg.

**Position B:** raise your leg straight up, kneecap pointing forward, pulling up your foot.

**Sets:** 3

**Repetitions:** 12

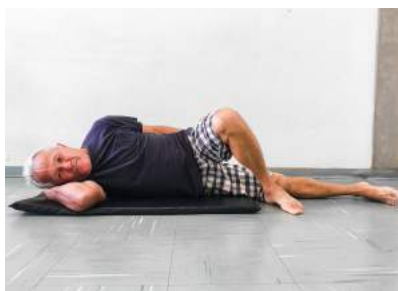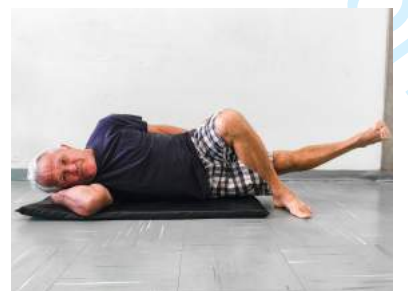

**Name: SLR – hip adduction**

**Type: Isotonic**

**Position A:** side lying position, leg in contact with the floor straight and the other leg bent.

**Position B:** raise your leg straight up, kneecap pointing forward, pulling up your foot.

**Sets:** 3

**Repetitions:** 12

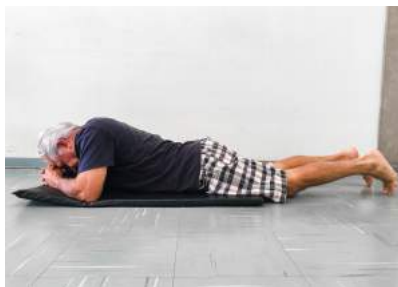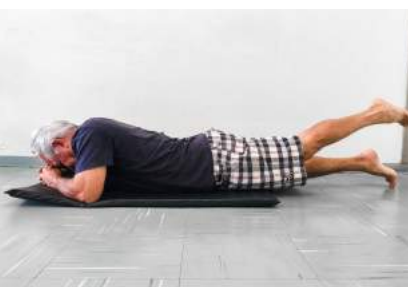

**Name: SLR – hip extension**

**Type: Isotonic**

**Position A:** prone position, both legs straight touching the floor.

**Position B:** raise one leg up at a time, keeping the totally knee straight.

**Sets:** 3

**Repetitions:** 12

# SUPPLEMENTARY FILE

A

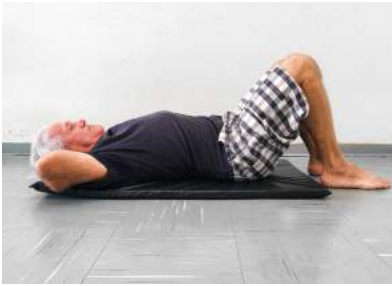

B

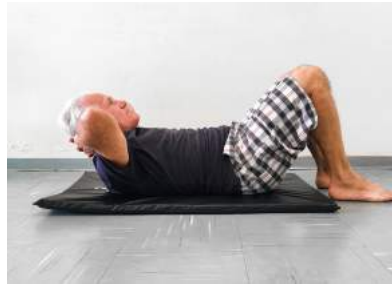

**Name:** Abdominal curls (crunches)

**Type:** Isotonic

**Position A:** lie down on the mat, place your hands behind your head, bend your knees and keep them aligned with hips.

**Position B:** as you exhale, slowly lift your chest up; as you inhale, slowly lower your chest down. Avoid bringing your chin to your chest.

**Sets:** 3

**Repetitions:** 12

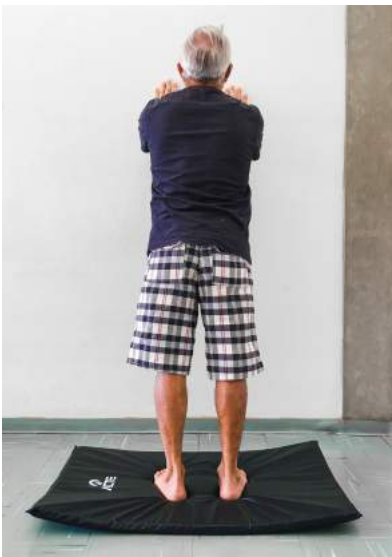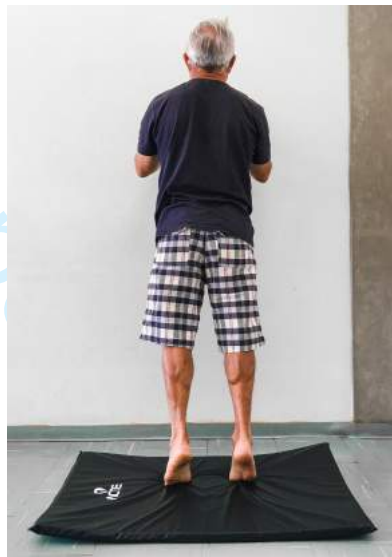

**Name:** Standing calf raises

**Type:** Isotonic

**Position A:** Standing on both legs, hands on the wall for balance (if needed).

**Position B:** rise up on toes then slowly lower down.

**Sets:** 3

**Repetitions:** 12

## Conditioning PHASE 2

A

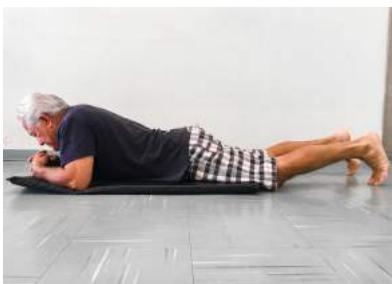

B

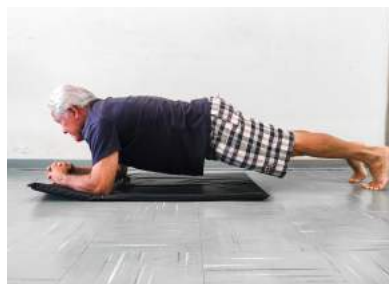

**Name:** Plank

**Type:** Isometric

**Position A:** lying on your belly (prone position).

**Position B:** lift your entire body up with elbow and feet supports. Hold for 15 up to 30 seconds.

**Sets:** 3 x 15-30 seconds

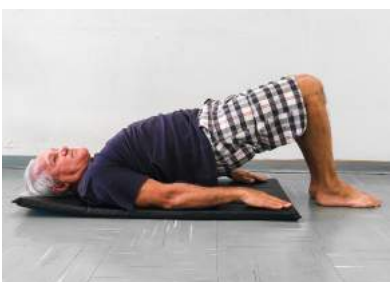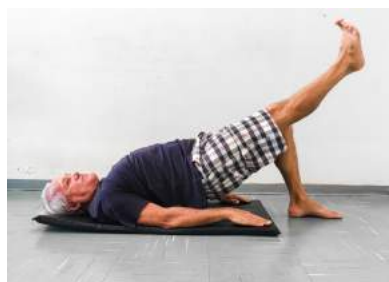

**Name:** Bridge with one leg

**Type:** Isometric

**Position A:** lie down on the mat, knees pointing to the ceiling, knees aligned with hips.

**Position B:** raise your hips up toward the ceiling then carefully take one leg off the floor. Hold for 15 up to 30 s.

**Sets:** 3 x 15-30 seconds



# SUPPLEMENTARY FILE

A

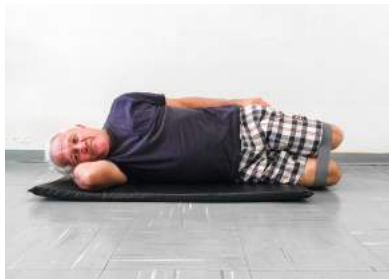

B

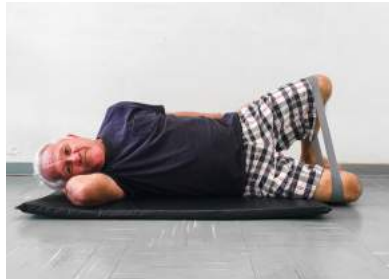**Name: Clam shell****Type: Isotonic****Position A:** side lying position, elastic band around your thighs, knees bent.**Position B:** move your knee away, squeezing your buttocks then slowly return. Repeat with the other side/leg.**Sets: 3****Repetitions: 12**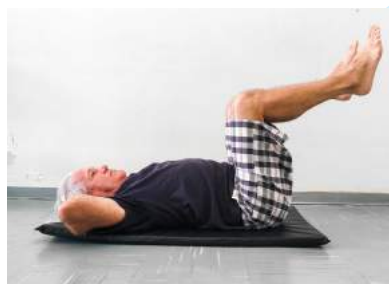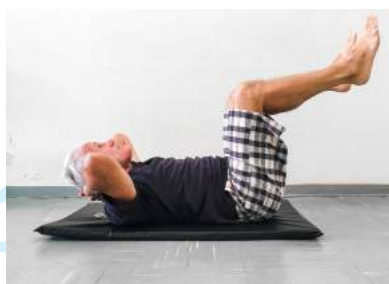**Name: Abdominal curls with lifted legs****Type: Isotonic****Position A:** lie down on the mat, place your hands behind your head, bend your knees and keep them aligned with hips. Lift both legs up.**Position B:** as you exhale, slowly lift your chest up; as you inhale, slowly lower your chest down. Avoid bringing your chin to your chest.**Sets: 3****Repetitions: 12**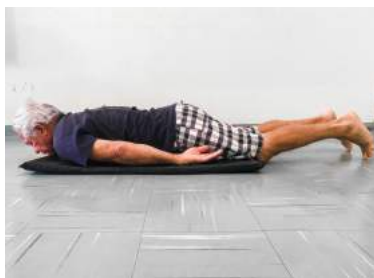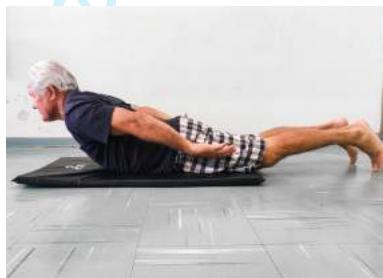**Name: Trunk extension****Type: Isometric****Position A:** lying on your belly (prone position).**Position B:** move your chest away from the floor. Look at the ground. Hold for 30 seconds at least.**Repetitions: 3 x 30 seconds**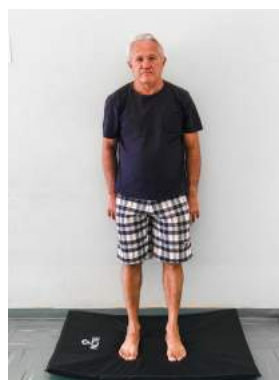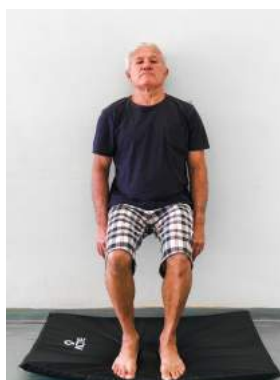**Name: Wall squat****Type: Isometric contraction****Position A:** stand with your trunk to a wall, feet aligned with knees and hips, and away from the wall.**Position B:** slide down and keep your trunk towards the wall. Hold for 30 seconds up to one minute.**Repetitions: 3**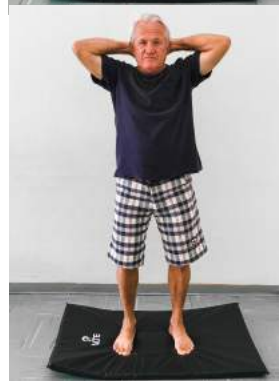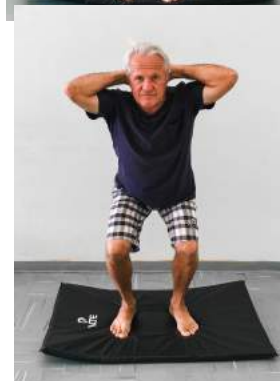**Name: Partial squat****Type: isotonic contraction****Position A:** standing on both legs.**Position B:** slowly bend your knees and stand up again. Maintain your knees over your feet.**Repetitions: 3**

# SUPPLEMENTARY FILE

A

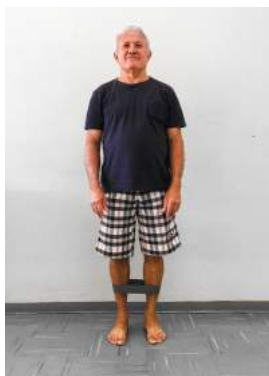

B

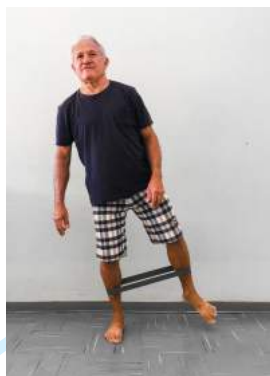

**Name:** Standing hip abduction.

**Type:** static balance

**Position A:** standing on both legs with an elastic band around both legs.

**Position B:** lift one leg out, maintain the kneecap pointing forward, and hold for 30 seconds or more.

**Repetitions:** 3 (each leg)

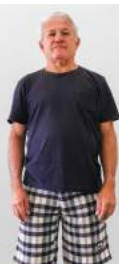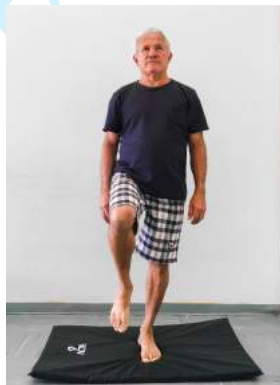

**Name:** Standing on one leg

**Type:** static balance on stable surface

**Position A:** standing on both legs, eyes opened.

**Position B:** standing on one leg, knee slightly bent, lift the other leg off the floor and maintain the position up to 1 minute.

**Repetitions:** 2 (each leg)

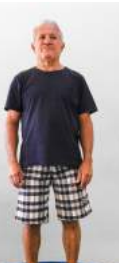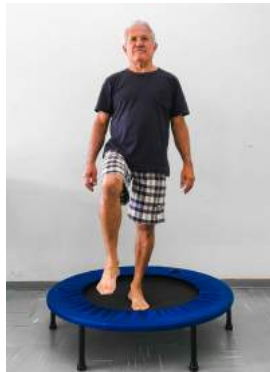

**Name:** Standing on one leg

**Type:** static balance on unstable surface (trampoline, foam etc)

**Position A:** standing on both legs, eyes opened.

**Position B:** standing on one leg, remove another leg from ground and maintain the position.

**Repetitions:** 2 (each leg)

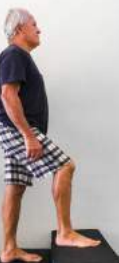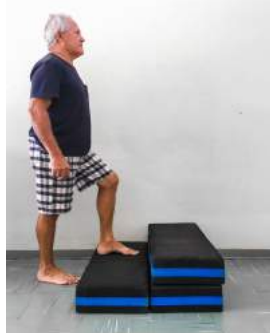

**Name:** Step-up

**Type:** isotonic contraction

**Position A:** on leg onto a step.

**Position B:** step up onto the next step, use the wall for balance if needed. Step back down carefully to the position A.

**Sets:** 2 (each leg)

**Repetitions:** 12

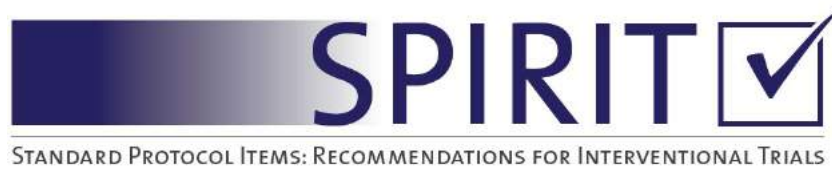

SPIRIT 2013 Checklist: Recommended items to address in a clinical trial protocol and related documents\*

| Section/item                      | Item No | Description                                                                                                                                                                                                                                                                                           |
|-----------------------------------|---------|-------------------------------------------------------------------------------------------------------------------------------------------------------------------------------------------------------------------------------------------------------------------------------------------------------|
| <b>Administrative information</b> |         |                                                                                                                                                                                                                                                                                                       |
| Title                             | 1       | Descriptive title identifying the study design, population, interventions, and, if applicable, trial acronym - <b>PAGE 01</b>                                                                                                                                                                         |
| Trial registration                | 2a      | Trial identifier and registry name. If not yet registered, name of intended registry - <b>PAGE 02</b>                                                                                                                                                                                                 |
|                                   | 2b      | All items from the World Health Organization Trial Registration Data Set - <b>N/A</b>                                                                                                                                                                                                                 |
| Protocol version                  | 3       | Date and version identifier - <b>N/A</b>                                                                                                                                                                                                                                                              |
| Funding                           | 4       | Sources and types of financial, material, and other support - <b>PAGE 14</b>                                                                                                                                                                                                                          |
| Roles and responsibilities        | 5a      | Names, affiliations, and roles of protocol contributors - <b>PAGE 01</b>                                                                                                                                                                                                                              |
|                                   | 5b      | Name and contact information for the trial sponsor - <b>N/A</b>                                                                                                                                                                                                                                       |
|                                   | 5c      | Role of study sponsor and funders, if any, in study design; collection, management, analysis, and interpretation of data; writing of the report; and the decision to submit the report for publication, including whether they will have ultimate authority over any of these activities - <b>N/A</b> |
|                                   | 5d      | Composition, roles, and responsibilities of the coordinating centre, steering committee, endpoint adjudication committee, data management team, and other individuals or groups overseeing the trial, if applicable (see Item 21a for data monitoring committee) - <b>N/A</b>                         |
| <b>Introduction</b>               |         |                                                                                                                                                                                                                                                                                                       |
| Background and rationale          | 6a      | Description of research question and justification for undertaking the trial, including summary of relevant studies (published and unpublished) examining benefits and harms for each intervention - <b>PAGE 4-6</b>                                                                                  |
|                                   | 6b      | Explanation for choice of comparators - <b>PAGE 4-6</b>                                                                                                                                                                                                                                               |
| Objectives                        | 7       | Specific objectives or hypotheses - <b>PAGE 4-6</b>                                                                                                                                                                                                                                                   |

1  
2  
3  
4  
5  
6  
7  
8  
9  
10  
11  
12  
13  
14  
15  
16  
17  
18  
19  
20  
21  
22  
23  
24  
25  
26  
27  
28  
29  
30  
31  
32  
33  
34  
35  
36  
37  
38  
39  
40  
41  
42  
43  
44  
45  
46  
47  
48  
49  
50  
51  
52  
53  
54  
55  
56  
57  
58  
59  
60

Trial design 8 Description of trial design including type of trial (eg, parallel group, crossover, factorial, single group), allocation ratio, and framework (eg, superiority, equivalence, noninferiority, exploratory) – PAGE 6

### Methods: Participants, interventions, and outcomes

Study setting 9 Description of study settings (eg, community clinic, academic hospital) and list of countries where data will be collected. Reference to where list of study sites can be obtained – PAGE 6

Eligibility criteria 10 Inclusion and exclusion criteria for participants. If applicable, eligibility criteria for study centres and individuals who will perform the interventions (eg, surgeons, psychotherapists) – PAGE 7

Interventions 11a Interventions for each group with sufficient detail to allow replication, including how and when they will be administered – PAGE 8-10

11b Criteria for discontinuing or modifying allocated interventions for a given trial participant (eg, drug dose change in response to harms, participant request, or improving/worsening disease) – PAGE 8-10

11c Strategies to improve adherence to intervention protocols, and any procedures for monitoring adherence (eg, drug tablet return, laboratory tests) – PAGE 8-10

11d Relevant concomitant care and interventions that are permitted or prohibited during the trial – PAGE 8-10

Outcomes 12 Primary, secondary, and other outcomes, including the specific measurement variable (eg, systolic blood pressure), analysis metric (eg, change from baseline, final value, time to event), method of aggregation (eg, median, proportion), and time point for each outcome. Explanation of the clinical relevance of chosen efficacy and harm outcomes is strongly recommended – PAGE 11

Participant timeline 13 Time schedule of enrolment, interventions (including any run-ins and washouts), assessments, and visits for participants. A schematic diagram is highly recommended (see Figure) – PAGE 21

Sample size 14 Estimated number of participants needed to achieve study objectives and how it was determined, including clinical and statistical assumptions supporting any sample size calculations – PAGE 12

Recruitment 15 Strategies for achieving adequate participant enrolment to reach target sample size – PAGE 7

### Methods: Assignment of interventions (for controlled trials)

Allocation:



|    |                                                           |     |                                                                            |
|----|-----------------------------------------------------------|-----|----------------------------------------------------------------------------|
| 1  |                                                           |     |                                                                            |
| 2  | Sequence                                                  | 16a | Method of generating the allocation sequence (eg, computer-                |
| 3  | generation                                                |     | generated random numbers), and list of any factors for stratification.     |
| 4  |                                                           |     | To reduce predictability of a random sequence, details of any planned      |
| 5  |                                                           |     | restriction (eg, blocking) should be provided in a separate document       |
| 6  |                                                           |     | that is unavailable to those who enrol participants or assign              |
| 7  |                                                           |     | interventions <b>- PAGE 11,12</b>                                          |
| 8  |                                                           |     |                                                                            |
| 9  |                                                           |     |                                                                            |
| 10 | Allocation                                                | 16b | Mechanism of implementing the allocation sequence (eg, central             |
| 11 | concealment                                               |     | telephone; sequentially numbered, opaque, sealed envelopes),               |
| 12 | mechanism                                                 |     | describing any steps to conceal the sequence until interventions are       |
| 13 |                                                           |     | assigned <b>- PAGE 11,12</b>                                               |
| 14 |                                                           |     |                                                                            |
| 15 | Implementation                                            | 16c | Who will generate the allocation sequence, who will enrol participants,    |
| 16 |                                                           |     | and who will assign participants to interventions <b>- PAGE 11,12</b>      |
| 17 |                                                           |     |                                                                            |
| 18 |                                                           |     |                                                                            |
| 19 | Blinding                                                  | 17a | Who will be blinded after assignment to interventions (eg, trial           |
| 20 | (masking)                                                 |     | participants, care providers, outcome assessors, data analysts), and       |
| 21 |                                                           |     | how <b>- PAGE 8, 9, 11, 12</b>                                             |
| 22 |                                                           |     |                                                                            |
| 23 |                                                           | 17b | If blinded, circumstances under which unblinding is permissible, and       |
| 24 |                                                           |     | procedure for revealing a participant's allocated intervention during      |
| 25 |                                                           |     | the trial <b>- PAGE 8, 9, 11, 12</b>                                       |
| 26 |                                                           |     |                                                                            |
| 27 |                                                           |     |                                                                            |
| 28 | <b>Methods: Data collection, management, and analysis</b> |     |                                                                            |
| 29 |                                                           |     |                                                                            |
| 30 | Data collection                                           | 18a | Plans for assessment and collection of outcome, baseline, and other        |
| 31 | methods                                                   |     | trial data, including any related processes to promote data quality (eg,   |
| 32 |                                                           |     | duplicate measurements, training of assessors) and a description of        |
| 33 |                                                           |     | study instruments (eg, questionnaires, laboratory tests) along with        |
| 34 |                                                           |     | their reliability and validity, if known. Reference to where data          |
| 35 |                                                           |     | collection forms can be found, if not in the protocol <b>- PAGE 12, 13</b> |
| 36 |                                                           |     |                                                                            |
| 37 |                                                           |     |                                                                            |
| 38 |                                                           | 18b | Plans to promote participant retention and complete follow-up,             |
| 39 |                                                           |     | including list of any outcome data to be collected for participants who    |
| 40 |                                                           |     | discontinue or deviate from intervention protocols <b>- PAGE 12, 13</b>    |
| 41 |                                                           |     |                                                                            |
| 42 | Data                                                      | 19  | Plans for data entry, coding, security, and storage, including any         |
| 43 | management                                                |     | related processes to promote data quality (eg, double data entry;          |
| 44 |                                                           |     | range checks for data values). Reference to where details of data          |
| 45 |                                                           |     | management procedures can be found, if not in the protocol <b>- PAGE</b>   |
| 46 |                                                           |     | <b>12, 13</b>                                                              |
| 47 |                                                           |     |                                                                            |
| 48 |                                                           |     |                                                                            |
| 49 | Statistical                                               | 20a | Statistical methods for analysing primary and secondary outcomes.          |
| 50 | methods                                                   |     | Reference to where other details of the statistical analysis plan can be   |
| 51 |                                                           |     | found, if not in the protocol <b>- PAGE 12, 13</b>                         |
| 52 |                                                           |     |                                                                            |
| 53 |                                                           |     |                                                                            |
| 54 |                                                           | 20b | Methods for any additional analyses (eg, subgroup and adjusted             |
| 55 |                                                           |     | analyses) <b>- PAGE 12, 13</b>                                             |
| 56 |                                                           |     |                                                                            |
| 57 |                                                           | 20c | Definition of analysis population relating to protocol non-adherence       |
| 58 |                                                           |     | (eg, as randomised analysis), and any statistical methods to handle        |
| 59 |                                                           |     | missing data (eg, multiple imputation) <b>- PAGE 12, 13</b>                |
| 60 |                                                           |     |                                                                            |

**Methods: Monitoring**

|                 |     |                                                                                                                                                                                                                                                                                                                                                  |
|-----------------|-----|--------------------------------------------------------------------------------------------------------------------------------------------------------------------------------------------------------------------------------------------------------------------------------------------------------------------------------------------------|
| Data monitoring | 21a | Composition of data monitoring committee (DMC); summary of its role and reporting structure; statement of whether it is independent from the sponsor and competing interests; and reference to where further details about its charter can be found, if not in the protocol. Alternatively, an explanation of why a DMC is not needed <b>N/A</b> |
|                 | 21b | Description of any interim analyses and stopping guidelines, including who will have access to these interim results and make the final decision to terminate the trial <b>- PAGE 5-7</b>                                                                                                                                                        |
| Harms           | 22  | Plans for collecting, assessing, reporting, and managing solicited and spontaneously reported adverse events and other unintended effects of trial interventions or trial conduct <b>- PAGE 5-7</b>                                                                                                                                              |
| Auditing        | 23  | Frequency and procedures for auditing trial conduct, if any, and whether the process will be independent from investigators and the sponsor <b>- PAGE 5-7</b>                                                                                                                                                                                    |

**Ethics and dissemination**

|                               |     |                                                                                                                                                                                                                                                       |
|-------------------------------|-----|-------------------------------------------------------------------------------------------------------------------------------------------------------------------------------------------------------------------------------------------------------|
| Research ethics approval      | 24  | Plans for seeking research ethics committee/institutional review board (REC/IRB) approval <b>- PAGE 13, 14</b>                                                                                                                                        |
| Protocol amendments           | 25  | Plans for communicating important protocol modifications (eg, changes to eligibility criteria, outcomes, analyses) to relevant parties (eg, investigators, REC/IRBs, trial participants, trial registries, journals, regulators) <b>- PAGE 13, 14</b> |
| Consent or assent             | 26a | Who will obtain informed consent or assent from potential trial participants or authorised surrogates, and how (see Item 32) <b>- PAGE 13, 14</b>                                                                                                     |
|                               | 26b | Additional consent provisions for collection and use of participant data and biological specimens in ancillary studies, if applicable <b>N/A</b>                                                                                                      |
| Confidentiality               | 27  | How personal information about potential and enrolled participants will be collected, shared, and maintained in order to protect confidentiality before, during, and after the trial <b>- PAGE 06, 07</b>                                             |
| Declaration of interests      | 28  | Financial and other competing interests for principal investigators for the overall trial and each study site <b>- PAGE 14</b>                                                                                                                        |
| Access to data                | 29  | Statement of who will have access to the final trial dataset, and disclosure of contractual agreements that limit such access for investigators <b>N/A</b>                                                                                            |
| Ancillary and post-trial care | 30  | Provisions, if any, for ancillary and post-trial care, and for compensation to those who suffer harm from trial participation <b>N/A</b>                                                                                                              |

- 1  
2  
3  
4  
5  
6  
7  
8  
9  
10  
11  
12  
13  
14  
15
- |                         |     |                                                                                                                                                                                                                                                                                                             |
|-------------------------|-----|-------------------------------------------------------------------------------------------------------------------------------------------------------------------------------------------------------------------------------------------------------------------------------------------------------------|
| Dissemination<br>policy | 31a | Plans for investigators and sponsor to communicate trial results to participants, healthcare professionals, the public, and other relevant groups (eg, via publication, reporting in results databases, or other data sharing arrangements), including any publication restrictions —<br><b>PAGE 13, 14</b> |
|                         | 31b | Authorship eligibility guidelines and any intended use of professional writers <b>N/A</b>                                                                                                                                                                                                                   |
|                         | 31c | Plans, if any, for granting public access to the full protocol, participant-level dataset, and statistical code — <b>PAGE 13, 14</b>                                                                                                                                                                        |

## 16 Appendices

- 17  
18  
19  
20  
21  
22  
23  
24
- |                               |    |                                                                                                                                                                                                           |
|-------------------------------|----|-----------------------------------------------------------------------------------------------------------------------------------------------------------------------------------------------------------|
| Informed consent<br>materials | 32 | Model consent form and other related documentation given to participants and authorised surrogates <b>N/A</b>                                                                                             |
| Biological<br>specimens       | 33 | Plans for collection, laboratory evaluation, and storage of biological specimens for genetic or molecular analysis in the current trial and for future use in ancillary studies, if applicable <b>N/A</b> |

---

25 \*It is strongly recommended that this checklist be read in conjunction with the SPIRIT 2013  
26 Explanation & Elaboration for important clarification on the items. Amendments to the  
27 protocol should be tracked and dated. The SPIRIT checklist is copyrighted by the SPIRIT  
28 Group under the Creative Commons "[Attribution-NonCommercial-NoDerivs 3.0 Unported](https://creativecommons.org/licenses/by-nc-nd/3.0/)"  
29 license.  
30  
31  
32  
33  
34  
35  
36  
37  
38  
39  
40  
41  
42  
43  
44  
45  
46  
47  
48  
49  
50  
51  
52  
53  
54  
55  
56  
57  
58  
59  
60

# BMJ Open

## CRYOTHERAPY ASSOCIATED WITH TAILORED LAND-BASED EXERCISES FOR KNEE OSTEOARTHRITIS: A PROTOCOL FOR A RANDOMIZED TRIAL

|                                 |                                                                                                                                                                                                                                                                                                                                                                                                                                                                                                   |
|---------------------------------|---------------------------------------------------------------------------------------------------------------------------------------------------------------------------------------------------------------------------------------------------------------------------------------------------------------------------------------------------------------------------------------------------------------------------------------------------------------------------------------------------|
| Journal:                        | <i>BMJ Open</i>                                                                                                                                                                                                                                                                                                                                                                                                                                                                                   |
| Manuscript ID                   | bmjopen-2019-035610.R1                                                                                                                                                                                                                                                                                                                                                                                                                                                                            |
| Article Type:                   | Protocol                                                                                                                                                                                                                                                                                                                                                                                                                                                                                          |
| Date Submitted by the Author:   | 17-Feb-2020                                                                                                                                                                                                                                                                                                                                                                                                                                                                                       |
| Complete List of Authors:       | Ogura Dantas, Lucas; Federal University of Sao Carlos, Physiotherapy Serafim Jorge, Ana Elisa; Federal University of Sao Carlos, Physiotherapy Serrao, Paula; Federal University of Sao Carlos, Physiotherapy Sendín, Francisco; Universidad de Córdoba, 2Sociosanitary Sciences, Radiology and Physical Medicine, University of Córdoba, Córdoba, Spain and Instituto Maiomónides de Investigación Biomédica de Córdoba (IMIBIC) Salvini, Tania; Federal University of Sao Carlos, Physiotherapy |
| <b>Primary Subject Heading</b>: | Rheumatology                                                                                                                                                                                                                                                                                                                                                                                                                                                                                      |
| Secondary Subject Heading:      | Rheumatology, Rehabilitation medicine                                                                                                                                                                                                                                                                                                                                                                                                                                                             |
| Keywords:                       | PAIN MANAGEMENT, REHABILITATION MEDICINE, PUBLIC HEALTH                                                                                                                                                                                                                                                                                                                                                                                                                                           |
|                                 |                                                                                                                                                                                                                                                                                                                                                                                                                                                                                                   |

SCHOLARONE™  
Manuscripts

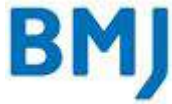

I, the Submitting Author has the right to grant and does grant on behalf of all authors of the Work (as defined in the below author licence), an exclusive licence and/or a non-exclusive licence for contributions from authors who are: i) UK Crown employees; ii) where BMJ has agreed a CC-BY licence shall apply, and/or iii) in accordance with the terms applicable for US Federal Government officers or employees acting as part of their official duties; on a worldwide, perpetual, irrevocable, royalty-free basis to BMJ Publishing Group Ltd ("BMJ") its licensees and where the relevant Journal is co-owned by BMJ to the co-owners of the Journal, to publish the Work in this journal and any other BMJ products and to exploit all rights, as set out in our [licence](#).

The Submitting Author accepts and understands that any supply made under these terms is made by BMJ to the Submitting Author unless you are acting as an employee on behalf of your employer or a postgraduate student of an affiliated institution which is paying any applicable article publishing charge ("APC") for Open Access articles. Where the Submitting Author wishes to make the Work available on an Open Access basis (and intends to pay the relevant APC), the terms of reuse of such Open Access shall be governed by a Creative Commons licence – details of these licences and which [Creative Commons](#) licence will apply to this Work are set out in our licence referred to above.

Other than as permitted in any relevant BMJ Author's Self Archiving Policies, I confirm this Work has not been accepted for publication elsewhere, is not being considered for publication elsewhere and does not duplicate material already published. I confirm all authors consent to publication of this Work and authorise the granting of this licence.

1  
2  
3 1 **TITLE:** CRYOTHERAPY ASSOCIATED WITH TAILORED LAND-BASED EXERCISES  
4  
5 2 FOR KNEE OSTEOARTHRITIS: A PROTOCOL FOR A RANDOMIZED TRIAL  
6  
7  
8 3  
9

10 4 Lucas Ogura Dantas<sup>1</sup>, PT; Ana Elisa Serafim Jorge<sup>1</sup>, PT, MSc, PhD; Paula Regina Mendes Silva  
11  
12 5 Serrao<sup>1</sup>, PT, MSc, PhD; Francisco Albuquerque-Sendín<sup>2</sup>, PT, MSc, PhD; Tania Fatima Salvini<sup>1</sup>,  
13  
14 6 PT, MSc, PhD.  
15  
16  
17 7  
18

19 8 **Author Affiliations:** <sup>1</sup>Physical Therapy Department, Federal University of São Carlos, São  
20  
21 9 Carlos, Brazil. <sup>2</sup>Sociosanitary Sciences, Radiology and Physical Medicine, University of Córdoba,  
22  
23 10 Córdoba, Spain and Instituto Maiomónides de Investigación Biomédica de Córdoba (IMIBIC),  
24  
25 11 Córdoba, Spain.  
26  
27  
28 12  
29  
30

31 13 **Corresponding Author:** Tania Fatima Salvini, PT, MSc, PhD. Neuromuscular Plasticity  
32  
33 14 Laboratory, Physical Therapy Department, Federal University of São Carlos, Rodovia Washington  
34  
35 15 Luiz, Km 235, CEP:13.565-905, CxP: 676, São Carlos, SP, Brazil ([tania@ufscar.br](mailto:tania@ufscar.br))  
36  
37  
38  
39 16  
40  
41 17  
42  
43 18  
44  
45 19  
46  
47 20  
48  
49 21  
50  
51  
52  
53  
54  
55  
56  
57  
58  
59  
60

## 1 **ABSTRACT**

2 **Introduction:** There is an unmet need to develop tailored therapeutic exercise protocols applying  
3 different treatment parameters and modalities for individuals with knee osteoarthritis (KOA).

4 Cryotherapy is widely used in rehabilitation as an adjunct treatment due to its effects on pain and  
5 the inflammatory process. However, disagreement between KOA guidelines remains with respect  
6 to its recommendation status. The aim of this study is to verify the complementary effects of  
7 cryotherapy when associated with a tailored therapeutic exercise protocol on patients with KOA.

8 **Methods and analysis:** This study is a placebo-controlled, randomized trial with concealed  
9 allocation and intention-to-treat analysis. Assessments will be performed at baseline and  
10 immediately following the intervention period. To check for residual effects of the interventions  
11 applied, three- and six-month follow-up assessments will be performed. Participants will be  
12 community members living with KOA. There will be three groups: (1) the experimental group that  
13 will receive a tailored therapeutic exercise protocol followed by a cryotherapy session of 20  
14 minutes; (2) the sham control group that will receive the same regimen as the first group, but with  
15 sham packs filled with dry sand; and (3) the active treatment control group that will receive only  
16 the therapeutic exercise protocol. The primary outcome will be pain intensity according to a Visual  
17 Analogue Scale. Secondary outcomes will be the Western Ontario & McMaster Universities  
18 Osteoarthritis Index; the Medical Outcomes Survey Short-Form 36 questionnaire; the 30-Second  
19 Chair Stand Test; the Stair Climb test; and the 40-Meter fast-paced walk test.

20 **Ethics and dissemination:** The trial was approved by the Institutional Ethics Committee of  
21 Federal University of Sao Carlos, São Paulo, Brazil. Registration approval number: CAAE:  
22 65966617.9.0000.5504. The results will be published in peer-reviewed journals.

23 **Trial registration number:** NCT03360500

1  
2  
3 **1 Strengths and limitations of this study:**  
4

- 5 2     ▪ The trial will be conducted according to well-established reporting guidelines.  
6  
7  
8 3     ▪ Participants will present with radiographically confirmed knee osteoarthritis and a  
9  
10 4     sufficient level of pain to ensure ample scope for improvement.  
11  
12 5     ▪ The trial will use both subjective and objective outcome measures.  
13  
14  
15 6     ▪ The therapist who delivers cryotherapy or the placebo intervention and the patients will not  
16  
17 7     be blinded.  
18  
19 8     ▪ The loss to follow-up after randomization in the placebo group might be higher than those  
20  
21 9     in the other groups.  
22  
23  
24 10  
25  
26 11  
27  
28 12  
29  
30 13  
31  
32 14  
33  
34 15  
35  
36 16  
37  
38 17  
39  
40  
41  
42  
43  
44  
45  
46  
47  
48  
49  
50  
51  
52  
53  
54  
55  
56  
57  
58  
59  
60



1 Knee osteoarthritis (KOA) is a serious disease with a high societal and economic burden,<sup>1</sup> affecting  
2 approximately 250 million people worldwide.<sup>2</sup> Current clinical practice guidelines recommend a  
3 combination of pharmacological<sup>3</sup> and non-pharmacological<sup>4</sup> treatment strategies to manage KOA  
4 symptoms and improve patients' quality of life. However, pharmacological treatment options that  
5 have been proven to relieve symptoms remain limited, and some of the most commonly  
6 recommended pharmacologic treatments are poorly tolerated, with long-term use resulting in  
7 serious systemic adverse events.<sup>5-7</sup>

8  
9 Physical Therapy, specifically the use of strengthening therapeutic exercise (STE) protocols, have  
10 been shown to relieve pain, reduce stiffness, increase physical function, and improve quality of  
11 life in patients with KOA.<sup>1,8</sup> High-quality evidence has demonstrated that the benefits of STE  
12 protocols on pain and quality of life in individuals with KOA are sustained for at least two to six  
13 months after the end of a treatment.<sup>8</sup> There is, however, a call for further research to develop novel  
14 insights within STE protocols regarding differences in treatment durations, frequencies,  
15 modalities, and intensities.<sup>9</sup> The majority of current protocols have reported low adherence and are  
16 substantially under-utilized by KOA patients, mainly due to socioeconomic barriers, personal  
17 beliefs, fear of movement, and aggravation of pain in the early phases of treatment.<sup>10,11</sup> Therefore,  
18 there is an unmet need for cost-effective, evidence-based STE protocols that are tailored to the  
19 needs of KOA patients, and that can aid clinicians in targeting rehabilitation goals.

20  
21 Physical modalities such as thermal agents, laser therapy, therapeutic ultrasound, and electrical  
22 stimulation are often used as adjunct treatments with therapeutic exercises in individuals with  
23 KOA.<sup>4,12</sup> Cryotherapy, a non-pharmacological intervention, has been widely used in some

1  
2  
3 1 rheumatic joint diseases<sup>13,14</sup> based on its effects on pain, inflammation, and edema.<sup>15,16</sup> The  
4  
5 2 intervention is considered safe, and is inexpensive and easy to administer for healthcare  
6  
7 3 professionals and patients. Moreover, it can be prescribed in isolation or as an adjunct treatment  
8  
9 4 and seems to be well accepted by individuals with KOA.<sup>14,17,18</sup> Although cryotherapy is  
10  
11 5 recommended as a treatment option by some international KOA guidelines,<sup>19,20</sup> others have found  
12  
13 6 insufficient evidence to support it.<sup>21-23</sup> Relevant systematic reviews have likewise concluded that  
14  
15 7 further evidence, produced with greater methodological rigor, is needed to evaluate the effects of  
16  
17 8 cryotherapy on pain, function, and quality of life in individuals with KOA.<sup>16,24</sup>  
18  
19  
20  
21  
22  
23

24 10 In this study, we aim to design a randomized trial to verify the complementary effects of  
25  
26 11 cryotherapy in conjunction with a tailored STE protocol on pain, function, and quality of life in  
27  
28 12 individuals with KOA. We hypothesize that cryotherapy combined with the STE protocol will  
29  
30 13 achieve better treatment effects on KOA patients when compared to the other two groups. The  
31  
32 14 proposed trial will contribute new evidence to the Physical Therapy field in KOA by focusing on  
33  
34 15 interventions that target rehabilitation and enhance pain management, thereby improving the  
35  
36 16 physical function and quality of life of these patients. Our research group developed the STE  
37  
38 17 protocol described in this study. The protocol was also used in another randomized trial testing the  
39  
40 18 complementary effects of Photobiomodulation in individuals with KOA (trial registration number  
41  
42 19 at [www.ensaiosclinicos.gov.br](http://www.ensaiosclinicos.gov.br): U1111-1215-6510). This manuscript has been submitted  
43  
44 20 simultaneously with the manuscript entitled “Photobiomodulation therapy associated with  
45  
46 21 supervised therapeutic exercises for people with knee osteoarthritis: a protocol for randomized  
47  
48 22 trials” (ID bmjopen-2019-035711).  
49  
50  
51  
52  
53  
54  
55  
56  
57  
58  
59  
60



1 interfere with the STE protocol. A verbal and written explanation of the objectives and  
2 methodology of the study will be provided to all the participants, and those willing to participate  
3 will sign a written informed consent form, approved by the local ethics committee. A detailed  
4 timeline of the trial is presented in **Table 1**.

## 6 **Patient and Public Involvement**

7 The patients and the public were not involved in the planning and design of this study.

## 9 **Participants**

10 Participants will be recruited through public announcements on social media, advertisements via  
11 local news outlets, University community newsletters, and banners or leaflets posted at strategic  
12 locations in the city. People who are interested in participating in the study will first be screened  
13 to check the eligibility criteria. Eligible participants will then undergo a lateral, anteroposterior,  
14 and axial radiography of both knees to determine KOA severity, which will take place at the  
15 University Hospital. Participants will be classified with KOA based on the clinical and  
16 radiographic criteria of the American College of Rheumatology,<sup>29</sup> and will be required to have  
17 symptoms and a radiographic grade (Kellgren and Lawrence scale) of  $\geq 2$  (mild radiographic OA)  
18 in at least one knee compartment.<sup>26</sup>

19  
20 To be included in the study, participants will also need to: be between 40 and 75 years old; be  
21 engaged in a total of less than 45 minutes/week of physical activity of at least moderate intensity<sup>30</sup>;  
22 have a body mass index  $< 35 \text{ kg/m}^2$ ; and to have reported pain intensity in the prior week of  $\geq 4 \text{ cm}$   
23 on a 10-cm visual analogue scale.<sup>26</sup> Exclusion criteria will comprise physical therapy in the prior

1 three months; intra-articular knee injections in the prior six months; medical restrictions such as  
2 cardiorespiratory, neurological, or any other rheumatology conditions; previous hip, knee, or ankle  
3 surgery; and any other chronic condition that leads to chronic pain or dysfunction. Additionally,  
4 participants presenting with contraindication(s) to cryotherapy application (i.e., those that feel a  
5 high level of discomfort or pain during the application) will be excluded.

6 All the participants will be asked to provide a medical certificate stating that they are healthy  
7 enough to perform physical activities before the start of the intervention.

## 8 **Interventions**

9 Two physical therapists will administer the interventions in the physiotherapy clinic of the  
10 University. The study will take place over the course of eight weeks, with three 90-minute sessions  
11 per week occurring on non-consecutive days, for a total of 24 sessions. All randomized participants  
12 will perform the STE protocol and then, according to random allocation, each patient will  
13 subsequently receive either cryotherapy or sham interventions in individual rooms.

14 Prior to the beginning of the study, the therapists responsible for the interventions will participate  
15 in a 10-hour training module, which will consist of scientific information and clinical training  
16 regarding KOA, the STE protocol, and the use of cryotherapy. After the first training module is  
17 completed, the therapists will do an eight-week training module, which will consist of practicing  
18 the full-length protocol and intervention application(s) three times per week. Both therapists will  
19 be responsible for delivering cryotherapy and sham interventions.

1  
2  
3 1 STE protocol  
4

5 2 We designed the 8-week land-based supervised exercise protocol according to the evidence-based  
6 3 recommendations for physical exercise interventions in KOA.<sup>31,32</sup> The STE protocol  
7 4 characteristics are described in **Figure 1**, and a detailed description of all the exercises is presented  
8 5 in the **Supplementary file** of this protocol. The protocol is divided into two phases. Each phase  
9 6 consists of 4 weeks of progressive exercises, performed three times per week on non-consecutive  
10 7 days (24 hours rest between sessions), with exercise intensity individually tailored for each  
11 8 participant. The first session is used to demonstrate and explain the STE protocol, and to perform  
12 9 an exercise familiarization using no loads by the participants. The second session is designed to  
13 10 estimate the initial resistance of each participant for each exercise. The volitional interruption  
14 11 method is used in order to achieve the benefits of resistance training and to reduce the risk of  
15 12 musculoskeletal injuries to the participants.<sup>33</sup> The loads are gradually increased until the  
16 13 participant can adequately perform 12 repetitions with no voluntary interruption due to muscle  
17 14 fatigue.  
18 15

19 16 The STE protocol sessions consist of three phases. The first phase is a 10-minute warm-up in  
20 17 which the patients can choose, according to their preferences, to walk in a comfortable intensity in  
21 18 an outdoor circuit, treadmill, or ride in a stationary bicycle. The second phase consists of 40  
22 19 minutes of strengthening exercises (resistance training), such as a lower limb and trunk muscles,  
23 20 and neuromuscular training involving balance exercises. The third phase is a cool-down phase,  
24 21 consisting of static stretching exercises to reduce the risk of musculoskeletal injuries and to  
25 22 maximize the benefit of the STE protocol.<sup>34</sup> Cardiac and respiratory frequencies and blood  
26 23 pressure are monitored at the beginning of each session or if the participant presents an intense

1 rate of perceived exertion according to the Borg scale while performing an exercise, to ensure  
2  
3  
4  
5  
6  
7  
8  
9  
10  
11  
12  
13  
14  
15  
16  
17  
18  
19  
20  
21  
22  
23  
24  
25  
26  
27  
28  
29  
30  
31  
32  
33  
34  
35  
36  
37  
38  
39  
40  
41  
42  
43  
44  
45  
46  
47  
48  
49  
50  
51  
52  
53  
54  
55  
56  
57  
58  
59  
60

1 rate of perceived exertion according to the Borg scale while performing an exercise, to ensure  
2 patient safety.<sup>35,36</sup>

#### 4 *Cryotherapy protocol*

5 To apply cryotherapy, the therapist will explain to the patient that the intervention will consist of  
6 crushed ice applied to the more-affected knee for 20 minutes. Participants will be positioned in  
7 dorsal decubitus with both legs extended and relaxed. The entire knee surface will be covered with  
8 a moist surgical gauze (45 × 50 × 0.01 cm) to protect the skin from possible frostbite. Next, two  
9 plastic bags (24 × 34 × 0.08 cm), each containing 1 kg of crushed ice, will be placed on the knee,  
10 covering the anterior, posterior, medial, and lateral surfaces. A comfortable, non-painful  
11 compression will be applied over the ice packs by wrapping an elastic bandage around them, and  
12 the therapy will be left in situ, uninterrupted, for 20 minutes. The primary purpose of compression  
13 is to maintain the ice packs in position on the knee<sup>37</sup> and to enhance cryotherapy effects.<sup>38</sup>

15 For the sham cryotherapy intervention, the bags will be filled with 1 kg of dry sand instead of ice.  
16 The sandbags will be applied according to the same regimen in the same locations. The therapist's  
17 explanation about the intervention will be changed to mention the 'application of sand packs'  
18 instead of 'cryotherapy application.' The sandbags will be applied with the same gauze underneath  
19 and the same bandage for compression.

#### 21 **Outcome measures**

22 The same blinded assessor will measure all outcomes before and after the intervention, and at the  
23 3- and 6-month follow-up periods. Before the study begins, the two outcome assessors will be



1 trained to conduct interviews and perform data collection following a standard protocol. **Table 2**  
2 describes the outcome measures that will be included in the trial and the recommended estimate  
3 of the minimum clinically important difference (MCID) for each outcome measure. We will  
4 measure pain intensity, subjective and objective physical function, and quality of life.

#### 6 *Primary outcome*

7 The primary outcome will be pain intensity at rest, assessed with a Visual Analogue Scale (VAS).  
8 This self-reported pain score is a valid and reliable measure for KOA.<sup>39</sup> The VAS will be  
9 administered at rest and after each physical function test, occurring at baseline, on the final  
10 assessment day, and at the 3- and 6-month follow-up periods.

#### 12 *Secondary outcomes*

13 To subjectively assess physical function and associated problems, the Western Ontario &  
14 McMaster Universities Osteoarthritis Index (WOMAC) will be used. WOMAC is a frequently  
15 used questionnaire in KOA and is translated, reproducible, and valid to Brazilian Portuguese.<sup>40</sup>  
16 The Medical Outcomes Survey Short-Form 36 (SF-36) questionnaire will be used to assess quality  
17 of life. The questionnaire is translated, reproducible, and valid to use in Brazilian Portuguese.<sup>41</sup>  
18 Three objective physical function tests will also be used: The 30-Second Chair Stand test, the Stair  
19 Climb test, and the 40-Meter fast-paced walk test. The questionnaires and physical function tests  
20 described are well-established core assessment measures of pain and physical function in patients  
21 with KOA, and presenting good scores for reliability, validity, and ability to detect change.<sup>42-46</sup>

## 1 **Randomization**

2 Eligible patients who consent to participate will be randomly allocated into three groups of 40: (1)  
3 active control group that will receive the STE protocol only, (2) STE + cryotherapy group, and (3)  
4 STE + sham cryotherapy group. The allocation of patients will be performed using permuted block  
5 randomization stratified by gender (20 men and 20 women in each group); randomization  
6 sequences will be determined by a computer-generated random numbers program  
7 (www.randomization.com). Allocation will be concealed by placing randomization assignments  
8 in opaque sealed envelopes that will be locked in a central location. A biostatistician will be  
9 responsible for generating the random numbers and each participant's random allocation will be  
10 revealed to the therapist administering the intervention just before study onset.<sup>26</sup>

## 12 ***Sample size***

13 We aim to detect a minimum clinically important difference (MCID) of 1.75 cm units on the VAS  
14 for pain intensity at rest.<sup>47</sup> Also, we aim to detect an MCID of 30 points on the WOMAC global  
15 score.<sup>48</sup> Calculations were based on an analysis of covariance adjusting for baseline outcome  
16 scores, assuming between-patient standard deviations of 2.0 cm for pain and 45 points for  
17 WOMAC global score. Based on these criteria, to achieve a significance level of 0.05 and a power  
18 of 0.80%, 37 participants with KOA will be required in each group. We will recruit 40 participants  
19 per group to allow possible dropouts during the intervention period.

## 21 ***Data analysis***

22 The analyses will be performed by a blinded biostatistician using commercial software. The  
23 Kolmogorov-Smirnov test will be applied to evaluate the normality of data distribution. If the

1 distribution is not normal, non-parametric tests will be used. For normal distributions, a 2-factor  
2 analysis of variance (ANOVA) will be conducted for the primary outcome (visual analogue scale  
3 for pain) and secondary outcomes, with time (baseline, post-intervention, and follow-up) as the  
4 within-subject factor and group (STE, STE + cryotherapy, STE + sham cryotherapy) as the  
5 between-subject factor. In addition, Tukey's test will be used for post-hoc analysis when  
6 necessary, and an intention-to-treat analysis will be performed for all randomized participants. All  
7 the missing data will be replaced using the expectation-maximization method. Between-group  
8 differences and their 95% confidence intervals will be reported and interpreted against the  
9 nominated thresholds for MCID. For the outcomes where the MCID is not nominated, Cohen's *d*  
10 coefficient will be calculated to aid interpretation. An effect size greater than 0.8 will be considered  
11 large, around 0.5 moderate, and less than or equal to 0.2, small<sup>49</sup>.

## 13 **ETHICS AND DISSEMINATION**

14 The Institutional Ethics Committee of the Federal University of Sao Carlos, São Paulo, Brazil,  
15 approved the under the registration approval number: CAAE: 65966617.9.0000.5504. The trial  
16 will be conducted according to the Helsinki Statement. All participants will provide written  
17 informed consent following a verbal and written explanation of the study protocol. Participants  
18 will be free to withdraw from the trial at any time without prejudice to future treatment. Results  
19 will be presented at scientific meetings and published in peer-reviewed journals. All publications  
20 and presentations related to the study will be authorized and reviewed by the study investigators.

## 1 TRIAL STATUS

2 The trial is currently recruiting and is expected to be completed (including follow-up testing) by  
3 December 2020.

## 5 AUTHORS CONTRIBUTION

6 L.O.D., A.E.S.J., P.R.S., F.A.S., and T.F.S. designed the study protocol. L.O.D. wrote the first  
7 draft of the manuscript, and together with A.E.S.J., P.R.S., F.A.S., and T.F.S. revised and produced  
8 the final version. All authors have read and approved the final version of the manuscript. L.O.D.  
9 takes responsibility for the integrity of the work as a whole.

## 11 FUNDING

12 LOD and AESJ were financially supported by Sao Paulo Research Foundation (FAPESP, Process  
13 numbers #2018/23705-3, and #2017/00062-7 respectively) and Conselho Nacional de  
14 Desenvolvimento Científico e Tecnológico (CNPQ # 401333/2016-7).

## 16 DISCLAIMER

17 The study funders have had no role in study design; collection, management, analysis and  
18 interpretation of data; writing of the report; or the decision to submit the report for publication,  
19 and do not own ultimate authority over any of these activities.

## 21 COMPETING INTERESTS

22 All authors have completed a uniform disclosure form and declare no conflicts of interest

## REFERENCES

1. Hunter DJ, Bierma-Zeinstra S. Osteoarthritis. *Lancet (London, England)*. 2019;393(10182):1745-1759. doi:10.1016/S0140-6736(19)30417-9
2. Vos T, Flaxman AD, Naghavi M, et al. Years lived with disability (YLDs) for 1160 sequelae of 289 diseases and injuries 1990–2010: a systematic analysis for the Global Burden of Disease Study 2010. *Lancet*. 2012;380(9859):2163-2196. doi:10.1016/S0140-6736(12)61729-2
3. Mandl LA. Osteoarthritis year in review 2018: clinical. *Osteoarthr Cartil*. 2018;(xxxx):1-6. doi:10.1016/j.joca.2018.11.001
4. Collins NJ, Hart HF, Mills KAG. OARSI year in review 2018: rehabilitation and outcomes. *Osteoarthr Cartil*. 2018;0(0). doi:10.1016/j.joca.2018.11.010
5. Vowles KE, Mcentee ML, Siyahhan P, Frohe T, Ney JP, Goes DN Van Der. Rates of opioid misuse, abuse, and addiction in chronic pain: a systematic review and data synthesis. *Pain*. 2015;156(4). <http://www.nejm.org/doi/10.1056/NEJMra1507771>.
6. Volkow ND, McLellan AT. Opioid Abuse in Chronic Pain — Misconceptions and Mitigation Strategies. *N Engl J Med*. 2016;374(13):1253-1263. doi:10.1056/NEJMra1507771
7. Deveza LA, Hunter DJ, Van Spil WE. Too much opioid, too much harm. *Osteoarthr Cartil*. 2018;26(3):293-295. doi:10.1016/j.joca.2017.12.003
8. Fransen M, McConnell S, Ar H, M VDE, Simic M, Kl B. Exercise for osteoarthritis of the knee. *Cochrane Libr*. 2015;(1):1-144. doi:10.1002/14651858.CD004376.pub3.[www.cochranelibrary.com](http://www.cochranelibrary.com)
9. Lee AC, Harvey WF, Price LL, et al. Dose-Response Effects of Tai Chi and Physical Therapy Exercise Interventions in Symptomatic Knee Osteoarthritis. *PM&R*. 2018;10(7):712-723. doi:10.1016/j.pmrj.2018.01.003
10. Nicolson PJAA, Bennell KL, Dobson FL, Van Ginckel A, Holden MA, Hinman RS. Interventions to increase adherence to therapeutic exercise in older adults with low back pain and/or hip/knee osteoarthritis: a systematic review and meta-analysis. *Br J Sports Med*. 2017;51(10):791-799. doi:10.1136/bjsports-2016-096458
11. Dobson F, Bennell KL, French SD, et al. Barriers and Facilitators to Exercise Participation in People with Hip and/or Knee Osteoarthritis. *Am J Phys Med Rehabil*.

- 2016;95(5):1. doi:10.1097/phm.0000000000000448
12. Oo WM, Thae Bo M. Efficacy of Physical Modalities in Knee Osteoarthritis: Recent Recommendations. *Int J Phys Med Rehabil*. 2016;04(03):3-4. doi:10.4172/2329-9096.1000e112
  13. Demoulin C, Vanderthommen M. Cryotherapy in rheumatic diseases. *Jt Bone Spine*. 2012;79(2):117-118. doi:10.1016/j.jbspin.2011.09.016
  14. Guillot X, Tordi N, Mourot L, et al. Cryotherapy in inflammatory rheumatic diseases: A systematic review. *Expert Rev Clin Immunol*. 2014;10(2):281-294. doi:10.1586/1744666X.2014.870036
  15. Bleakley CM, Davison GW. Cryotherapy and inflammation: evidence beyond the cardinal signs. *Phys Ther Rev*. 2010;15(6):430-435. doi:10.1179/1743288X10Y.0000000014
  16. Dantas LO, Moreira R de FC, Norde FM, Mendes Silva Serrao PR, Albuquerque-Sendin F, Salvini TF. The effects of cryotherapy on pain and function in individuals with knee osteoarthritis: a systematic review of randomized controlled trials. *Clin Rehabil*. April 2019:026921551984040. doi:10.1177/0269215519840406
  17. Porcheret M, Jordan K, Jinks C. Primary care treatment of knee pain - A survey in older adults. *Rheumatology*. 2007;46(11):1694-1700. doi:10.1093/rheumatology/kem232
  18. Denegar CR, Dougherty DR, Friedman JE, et al. Preferences for heat, cold, or contrast in patients with knee osteoarthritis affect treatment response. *Clin Interv Aging*. 2010;5:199-206. doi:10.2147/CIA.S11431
  19. Chae KJ, Choi MJ, Kim KY, Ajayi FF, Chang IS, Kim IS. National Institute for Health and Care Excellence. Osteoarthritis: Care and Management. December 2014.
  20. Hochberg MC, Altman RD, April KT, et al. American College of Rheumatology 2012 recommendations for the use of nonpharmacologic and pharmacologic therapies in osteoarthritis of the hand, hip, and knee. *Arthritis Care Res*. 2012;64(4):465-474. doi:10.1002/acr.21596
  21. McAlindon TE, Bannuru RR, Sullivan MC, et al. OARSI guidelines for the non-surgical management of knee osteoarthritis. *Osteoarthr Cartil*. 2014;22(3):363-388. doi:10.1016/j.joca.2014.01.003
  22. Fernandes L, Hagen KB, Bijlsma JWJJ, et al. EULAR recommendations for the non-pharmacological core management of hip and knee osteoarthritis. *Ann Rheum Dis*.

- 2013;72(7):1125-1135. doi:10.1136/annrheumdis-2012-202745
23. Brosseau L, Taki J, Desjardins B, et al. The Ottawa panel clinical practice guidelines for the management of knee osteoarthritis. Part two: strengthening exercise programs. *Clin Rehabil.* 2017;31(5):596-611. doi:10.1177/0269215517691084
24. Brosseau L, Yonge K a, Robinson V, et al. Thermotherapy for treatment of osteoarthritis. *Cochrane Database Syst Rev.* 2003;(4):CD004522. doi:10.1016/S0031-9406(05)60490-7
25. Chan A-W, Tetzlaff JM, Altman DG, et al. SPIRIT 2013 Statement: Defining Standard Protocol Items for Clinical Trials. *Ann Intern Med.* 2013;158(3):200. doi:10.7326/0003-4819-158-3-201302050-00583
26. McAlindon TE, Driban JB, Henrotin Y, et al. OARSI Clinical Trials Recommendations: Design, conduct, and reporting of clinical trials for knee osteoarthritis. *Osteoarthr Cartil.* 2015;23(5):747-760. doi:10.1016/j.joca.2015.03.005
27. Hoffmann TC, Glasziou PP, Boutron I, et al. Better reporting of interventions: template for intervention description and replication (TIDieR) checklist and guide. *BMJ.* 2014;348(mar07\_3):g1687. doi:10.1136/bmj.g1687
28. Barbour V, Bhui K, Chescheir N, et al. CONSORT Statement for randomized Trials of nonpharmacologic treatments: A 2017 update and a CONSORT extension for nonpharmacologic Trial Abstracts. *Ann Intern Med.* 2017;167(1):40-47. doi:10.7326/M17-0046
29. Altman R, Asch E, Bloch D, et al. Development of criteria for the classification and reporting of osteoarthritis. Classification of osteoarthritis of the knee. Diagnostic and Therapeutic Criteria Committee of the American Rheumatism Association. *Arthritis Rheum.* 1986;29(8):1039-1049. doi:10.1002/art.1780290816
30. Dunlop DD, Song J, Lee J, et al. Physical Activity Minimum Threshold Predicting Improved Function in Adults With Lower-Extremity Symptoms. *Arthritis Care Res.* 2017;69(4):475-483. doi:10.1002/acr.23181
31. Messier SP, Mihalko SL, Beavers DP, et al. Strength training for arthritis trial (START): Design and rationale. *BMC Musculoskelet Disord.* 2013;14(1):1. doi:10.1186/1471-2474-14-208
32. Fransen M, McConnell S, Harmer AR, Van Der Esch M, Simic M, Bennell KL. Exercise for osteoarthritis of the knee: A Cochrane systematic review. *Br J Sports Med.*



- 2015;49(24):1554-1557. doi:10.1136/bjsports-2015-095424
33. Nóbrega SR, Ugrinowitsch C, Pintanel L, Barcelos C, Libardi CA. Effect of Resistance Training to Muscle Failure vs. Volitional Interruption at High- and Low-Intensities on Muscle Mass and Strength. *J Strength Cond Res*. 2018;32(1):162-169. doi:10.1519/JSC.0000000000001787
34. Bennell KL, Dobson F, Hinman RS. Exercise in osteoarthritis: Moving from prescription to adherence. *Best Pract Res Clin Rheumatol*. 2014;28(1):93-117. doi:10.1016/j.berh.2014.01.009
35. American Geriatrics Society Panel on Exercise and Osteoarthritis. Exercise prescription for older adults with osteoarthritis pain: consensus practice recommendations. A supplement to the AGS Clinical Practice Guidelines on the management of chronic pain in older adults. *Jags*. 2001;49(6):808-823. doi:10.1046/j.1532-5415.2001.00496.x
36. Vincent KR, Vincent HK. Resistance exercise for knee osteoarthritis. *PM R*. 2012;4(5 Suppl):S45-52. doi:10.1016/j.pmrj.2012.01.019
37. Silva P, Lott R, Wickrama S, Mota J, Welk G. Elastic Bandaging for Orthopedic and Sports Injuries Prevention and Rehabilitation: A Systematic Review. *Int J Sport Nutr Exerc Metab*. 2016;32:1-44. doi:10.1123/ijsp.2015-0012
38. Song M, Sun X, Tian X, et al. Compressive cryotherapy versus cryotherapy alone in patients undergoing knee surgery: a meta-analysis. *Springerplus*. 2016;5(1):1-12. doi:10.1186/s40064-016-2690-7
39. Hawker GA, Mian S, Kendzerska T, French M. Measures of adult pain: Visual Analog Scale for Pain (VAS Pain), Numeric Rating Scale for Pain (NRS Pain), McGill Pain Questionnaire (MPQ), Short-Form McGill Pain Questionnaire (SF-MPQ), Chronic Pain Grade Scale (CPGS), Short Form-36 Bodily Pain Scale (SF. *Arthritis Care Res (Hoboken)*. 2011;63(S11):S240-S252. doi:10.1002/acr.20543
40. MI F. Tradução e validação do questionário de qualidade de vida específico para osteoartrose WOMAC (Western Ontario McMaster Universities) para a língua portuguesa. 2003.
41. Ciconelli RM, Ferraz MB, Santos W, Meinao I, Quaresma MR. Brazilian-Portuguese version of the SF-36. A reliable and valid quality of life outcome measure. *Rev Bras Reumatol*. 1999;39(3):143-150.



- 1  
2  
3 42. Dobson F, Bennell KL, Hinman RS, Abbott JH, Roos EM. Recommended performance -  
4 based tests to assess physical function in people diagnosed with hip or knee osteoarthritis.  
5 *OARSI - Osteoarthr Res Soc Int*. 2013;1:1-26. doi:10.1016/j.joca.2013.05.002  
6  
7  
8 43. Kolasinski SL, Neogi T, Hochberg MC, et al. 2019 American College of  
9 Rheumatology/Arthritis Foundation Guideline for the Management of Osteoarthritis of the  
10 Hand, Hip, and Knee. *Arthritis Rheumatol*. 2020;0(November):art.41142.  
11  
12  
13  
14  
15 44. Bannuru RR, Osani MC, Vaysbrot EE, et al. OARSI guidelines for the non-surgical  
16 management of knee, hip, and polyarticular osteoarthritis. *Osteoarthr Cartil*.  
17  
18 2019;27(11):1578-1589. doi:10.1016/j.joca.2019.06.011  
19  
20 45. Pham T, van der Heijde D, Altman R., et al. OMERACT-OARSI Initiative: Osteoarthritis  
21 Research Society International set of responder criteria for osteoarthritis clinical trials  
22 revisited. *Osteoarthr Cartil*. 2004;12(5):389-399. doi:10.1016/j.joca.2004.02.001  
23  
24  
25 46. Bennell K, Dobson F, Hinman R. Measures of physical performance assessments: Self-  
26 Paced Walk Test (SPWT), Stair Climb Test (SCT), Six-Minute Walk Test (6MWT), Chair  
27 Stand Test (CST), Timed Up & Go (TUG), Sock Test, Lift and Carry Test (LCT),  
28 and Car Task. *Arthritis Care Res (Hoboken)*. 2011;63(S11):S350-S370.  
29  
30  
31  
32  
33  
34 47. Bellamy N, Carette S, Ford P, et al. Osteoarthritis Antirheumatic Drug Trials. III. Setting  
35 the Delta for Clinical Trials--Results of a Consensus Development (Delphi) Exercise. *J*  
36  
37  
38  
39  
40 48. Fitzgerald GK, Fritz JM, Childs JD, et al. Exercise, manual therapy, and use of booster  
41 sessions in physical therapy for knee osteoarthritis: a multi-center, factorial randomized  
42 clinical trial. *Osteoarthr Cartil*. 2016;24(8):1340-1349. doi:10.1016/j.joca.2016.03.001  
43  
44  
45 49. Cohen J. *Statistical Power Analysis for the Behavioral Sciences*. 2nd Editio. (Hillsdale NJ.  
46  
47  
48  
49  
50 50. Angst F, Aeschlimann A, Stucki G. Smallest detectable and minimal clinically important  
51 differences of rehabilitation intervention with their implications for required sample sizes  
52 using WOMAC and SF-36 quality of life measurement instruments in patients with  
53 osteoarthritis of the lower ex. *Arthritis Rheum*. 2001;45(4):384-391. doi:10.1002/1529-  
54  
55  
56  
57  
58  
59  
60

- 1  
2  
3 51. Dobson F, Hinman RS, Roos EM, et al. OARSI recommended performance-based tests to  
4 assess physical function in people diagnosed with hip or knee osteoarthritis. *Osteoarthr*  
5 *Cartil.* 2013;21(8):1042-1052. doi:10.1016/j.joca.2013.05.002  
6  
7  
8  
9  
10  
11  
12  
13  
14  
15  
16  
17  
18  
19  
20  
21  
22  
23  
24  
25  
26  
27  
28  
29  
30  
31  
32  
33  
34  
35  
36  
37  
38  
39  
40  
41  
42  
43  
44  
45  
46  
47  
48  
49  
50  
51  
52  
53  
54  
55  
56  
57  
58  
59  
60

For peer review only

1  
2  
3 **Figure 1**  
4

5 **Legend:** Land Based Exercise Protocol Characteristics  
6  
7  
8  
9  
10  
11  
12  
13  
14  
15  
16  
17  
18  
19  
20  
21  
22  
23  
24  
25  
26  
27  
28  
29  
30  
31  
32  
33  
34  
35  
36  
37  
38  
39  
40  
41  
42  
43  
44  
45  
46  
47  
48  
49  
50  
51  
52  
53  
54  
55  
56  
57  
58  
59  
60

For peer review only

**Table 1.** Timeline of the measurements to be taken at each point on the trials

1  
2  
3  
4  
5  
6  
7  
8  
9  
10  
11  
12  
13  
14  
15  
16  
17  
18  
19  
20  
21  
22  
23  
24  
25  
26  
27  
28  
29  
30  
31  
32  
33  
34  
35  
36  
37  
38  
39  
40  
41  
42  
43  
44  
45  
46  
47

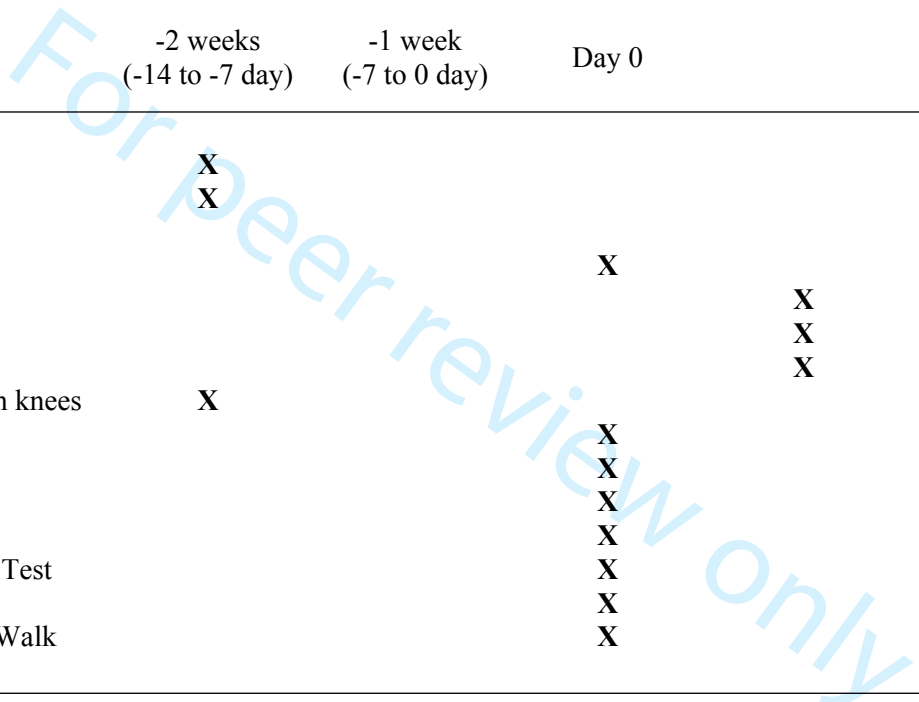

| <b>TIMELINE</b>      |                                  | <b>Enrolment</b>         | <b>STE protocol training</b> | <b>Baseline assessment (A1)</b> | <b>Intervention</b> | <b>Post-intervention assessment (A2)</b> | <b>Follow-up assessment (A3)</b> | <b>Follow-up assessment (A4)</b> |
|----------------------|----------------------------------|--------------------------|------------------------------|---------------------------------|---------------------|------------------------------------------|----------------------------------|----------------------------------|
|                      |                                  | -2 weeks (-14 to -7 day) | -1 week (-7 to 0 day)        | Day 0                           |                     | 8 weeks (±3 days)                        | 20 weeks (±3 days)               | 32 weeks (±3 days)               |
| <b>Enrolment</b>     | Eligibility screen               | <b>X</b>                 |                              |                                 |                     |                                          |                                  |                                  |
|                      | Informed consent                 | <b>X</b>                 |                              |                                 |                     |                                          |                                  |                                  |
| <b>Interventions</b> | Allocation                       |                          |                              | <b>X</b>                        |                     |                                          |                                  |                                  |
|                      | STE                              |                          |                              |                                 | <b>X</b>            |                                          |                                  |                                  |
|                      | STE + cryotherapy                |                          |                              |                                 | <b>X</b>            |                                          |                                  |                                  |
|                      | STE + sham cryotherapy           |                          |                              |                                 | <b>X</b>            |                                          |                                  |                                  |
|                      | X-ray examination of both knees  | <b>X</b>                 |                              |                                 |                     |                                          |                                  |                                  |
| <b>Assessments</b>   | VAS                              |                          |                              | <b>X</b>                        |                     | <b>X</b>                                 | <b>X</b>                         | <b>X</b>                         |
|                      | WOMAC                            |                          |                              | <b>X</b>                        |                     | <b>X</b>                                 | <b>X</b>                         | <b>X</b>                         |
|                      | SF-36                            |                          |                              | <b>X</b>                        |                     | <b>X</b>                                 | <b>X</b>                         | <b>X</b>                         |
|                      | Timed-up and Go Test             |                          |                              | <b>X</b>                        |                     | <b>X</b>                                 | <b>X</b>                         | <b>X</b>                         |
|                      | 30-Second Chair to Stand Test    |                          |                              | <b>X</b>                        |                     | <b>X</b>                                 | <b>X</b>                         | <b>X</b>                         |
|                      | Stair Climb Test                 |                          |                              | <b>X</b>                        |                     | <b>X</b>                                 | <b>X</b>                         | <b>X</b>                         |
|                      | 40m (4x10m) Fast Paced Walk Test |                          |                              | <b>X</b>                        |                     | <b>X</b>                                 | <b>X</b>                         | <b>X</b>                         |

STE: Strength Therapeutic Exercises; VAS: Visual Analogue Scale, WOMAC: Western Ontario & McMaster Universities Osteoarthritis questionnaire; KOOS: Knee Injury and Osteoarthritis Outcome Score; SF-36: Short Form-36 questionnaire.

A: Assessment

**Table 2.** Description of the outcome measures.

| Outcome measure                                                                 | Description of the test                                                                                                                                                                                                                                                                                                                                                                                                           | Scoring                                                                                                                                                  | Minimum clinically important difference                                                                   |
|---------------------------------------------------------------------------------|-----------------------------------------------------------------------------------------------------------------------------------------------------------------------------------------------------------------------------------------------------------------------------------------------------------------------------------------------------------------------------------------------------------------------------------|----------------------------------------------------------------------------------------------------------------------------------------------------------|-----------------------------------------------------------------------------------------------------------|
| <b>Visual analogue scale</b>                                                    | The scale is positioned in front of the patient who is asked to evaluate pain intensity in the prior week. <sup>39</sup>                                                                                                                                                                                                                                                                                                          | The scale ranges from 0 (no pain) to 10 cm (maximum pain intensity).                                                                                     | A pain reduction of 1.75 cm is recommended in OA research. <sup>47</sup>                                  |
| <b>Western Ontario &amp; McMaster Universities Osteoarthritis questionnaire</b> | This self-report questionnaire evaluates the difficulties experienced by individuals with lower limb OA in the prior 72 hours. It contains 24 questions in 3 domains: pain, stiffness, and physical function.                                                                                                                                                                                                                     | Each question is scored from 0 to 4, and the maximum score possible is 96. The higher the scores, the worse the status of a patient.                     | An improvement of 12% from baseline is recommended in OA research. <sup>50</sup>                          |
| <b>Stair Climb Test</b>                                                         | The participant is positioned in front of the stairs. At the therapist's signal, he/she has to climb the indicated steps (we used the 12-step SCT) and descend promptly, being able to use the handrail as a security instrument. We used 20 cm steps height, a handrail stair in an lighted environment, free of traffic, or external distractions. Moreover, a pre-test was conducted to identify the need for safety measures. | The final score is calculated based on the time the participant took to perform the test and compared it to the literature normative values of the test. | A reduction of 5.5 seconds in the test is the recommended MCID in OA research <sup>42</sup>               |
| <b>40m (4x10m) Fast Paced Walk Test</b>                                         | Administered at a distance of 10 meters (marked by tapes), a cone is placed 2 meters before the start and 2 meters after the end of each marking. The participant is instructed to walk as quickly but as safely as possible the first 10 meters (from the start mark), to turn around in the cone and walk back the 10 meters again, successively until completing the distance of 40 meters.                                    | Speed (m/s)                                                                                                                                              | An increase of 0.2-0.3 meters per second in the test is the recommended MCID in OA research <sup>42</sup> |
| <b>30-Second Chair to Stand Test</b>                                            | A chair with no arms is placed against a wall to prevent oscillations. Patients sit in the middle of the chair, with their back straight and feet resting on the floor in line with their shoulders. The participant is asked to rise from sitting to standing as many times as possible in 30 seconds.                                                                                                                           | Total number of repetitions within 30 seconds                                                                                                            | An increase of 2 to 3 repetitions is recommended in OA research. <sup>51</sup>                            |

OA: Osteoarthritis

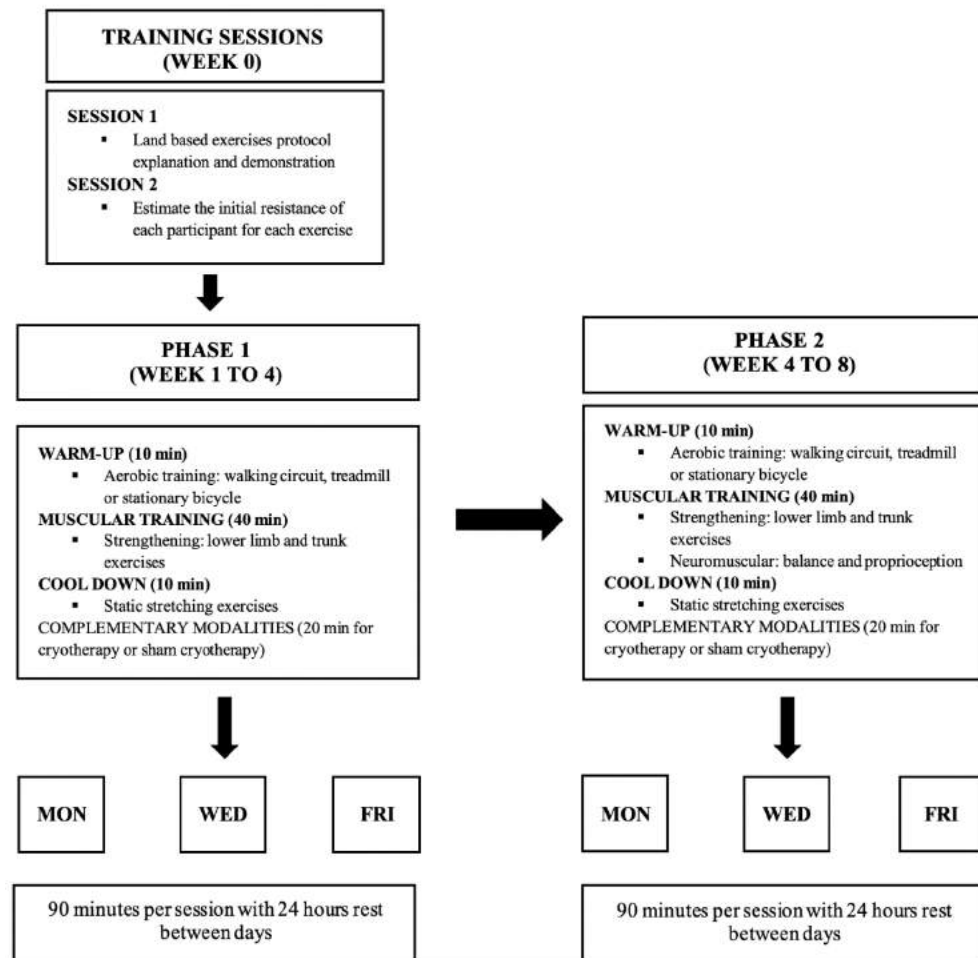

# SUPPLEMENTARY FILE

## Land-Based Exercises Protocol for Patients with Knee Osteoarthritis

### Warm-up Phase (10 min)



**Description: treadmill, stationary bicycle, or walking.**

Performed in a comfortable cardiorespiratory intensity aiming the joints mobility.

### Cool-down Phase (10 min)



**Description: Quadriceps stretching.**

Active stretching performed with maximum tolerable range of motion.

**Set: 1 x 30 seconds**



**Description: Gastrocnemius stretching.**

Active stretching performed with maximum tolerable range of motion.

**Set: 1 x 30 seconds**

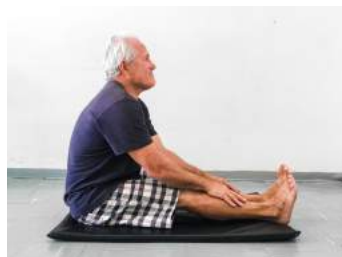

**Description: Hamstrings stretching.**

Active stretching performed with maximum tolerable range of motion.

**Set: 1 x 30 seconds**

# SUPPLEMENTARY FILE

## Conditioning PHASE 1

**A**

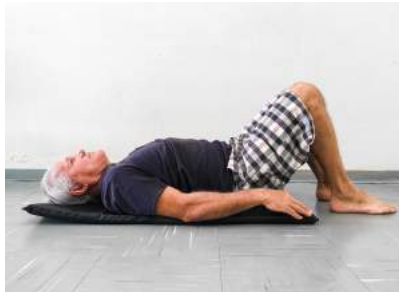

**B**

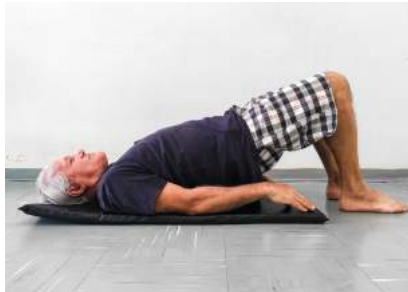

**Name: Bridge**

**Type: isometric**

**Position A:** lie down on the mat, knees pointing to the ceiling, knees aligned with hips.

**Position B:** raise your hips up toward the ceiling and hold for 15 up to 30 s.

**Sets:** 3 x 15-30 seconds

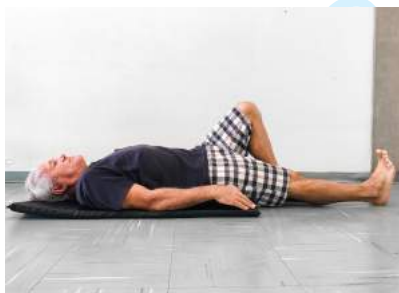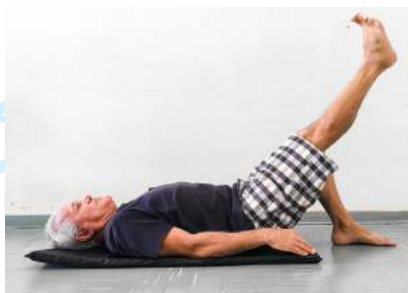

**Name: Straight Leg Raise (SLR) – hip flexion**

**Type: Isotonic**

**Position A:** lie down, one leg bent and another straight, pull up your foot.

**Position B:** raise your leg straight up until it is aligned with the other thigh, then slowly lower it down.

**Sets:** 3

**Repetitions:** 12

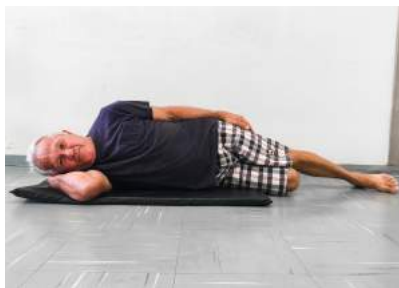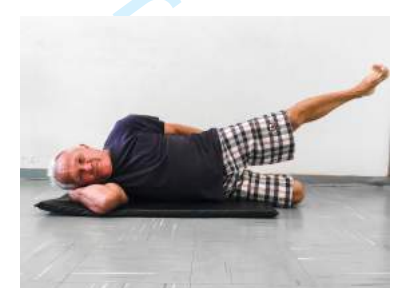

**Name: SLR – hip abduction**

**Type: Isotonic**

**Position A:** side lying position, bend the knee in contact with the floor and straight the other leg.

**Position B:** raise your leg straight up, kneecap pointing forward, pulling up your foot.

**Sets:** 3

**Repetitions:** 12

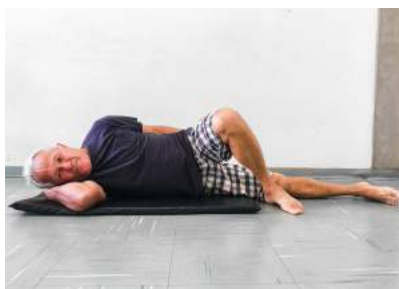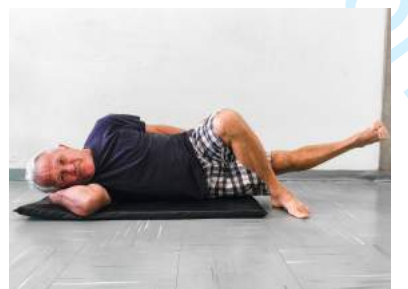

**Name: SLR – hip adduction**

**Type: Isotonic**

**Position A:** side lying position, leg in contact with the floor straight and the other leg bent.

**Position B:** raise your leg straight up, kneecap pointing forward, pulling up your foot.

**Sets:** 3

**Repetitions:** 12

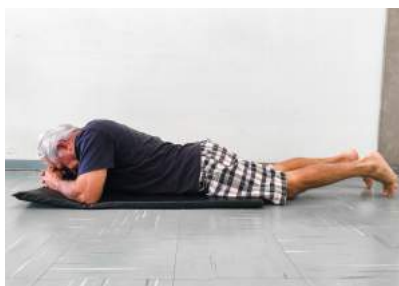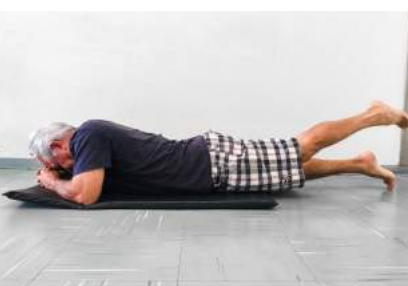

**Name: SLR – hip extension**

**Type: Isotonic**

**Position A:** prone position, both legs straight touching the floor.

**Position B:** raise one leg up at a time, keeping the totally knee straight.

**Sets:** 3

**Repetitions:** 12



# SUPPLEMENTARY FILE

A

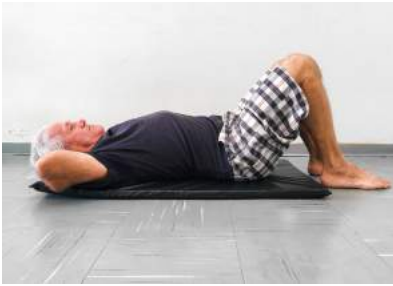

B

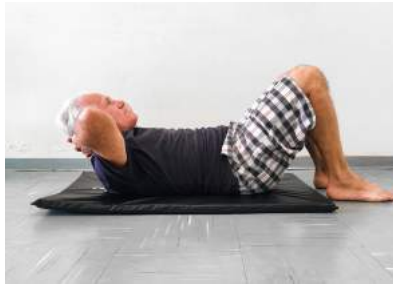

**Name:** Abdominal curls (crunches)

**Type:** Isotonic

**Position A:** lie down on the mat, place your hands behind your head, bend your knees and keep them aligned with hips.

**Position B:** as you exhale, slowly lift your chest up; as you inhale, slowly lower your chest down. Avoid bringing your chin to your chest.

**Sets:** 3

**Repetitions:** 12

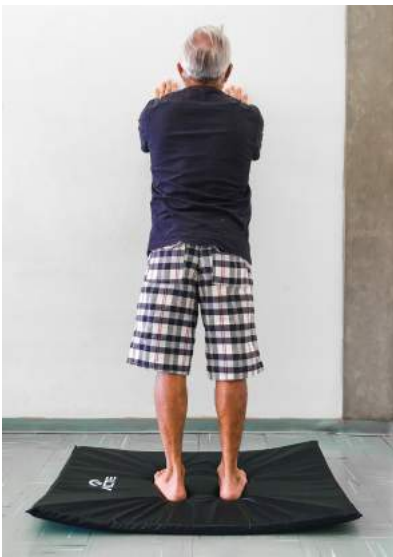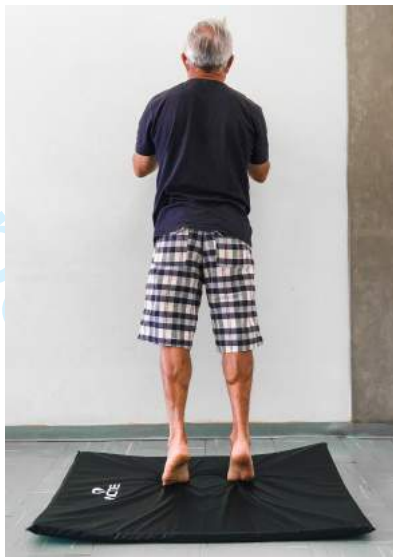

**Name:** Standing calf raises

**Type:** Isotonic

**Position A:** Standing on both legs, hands on the wall for balance (if needed).

**Position B:** rise up on toes then slowly lower down.

**Sets:** 3

**Repetitions:** 12

## Conditioning PHASE 2

A

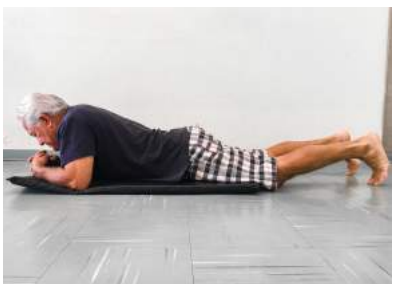

B

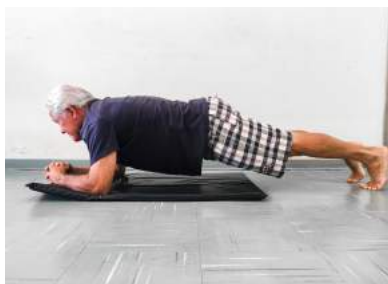

**Name:** Plank

**Type:** Isometric

**Position A:** lying on your belly (prone position).

**Position B:** lift your entire body up with elbow and feet supports. Hold for 15 up to 30 seconds.

**Sets:** 3 x 15-30 seconds

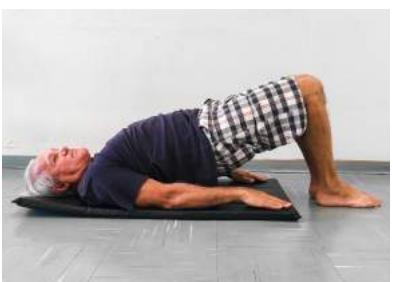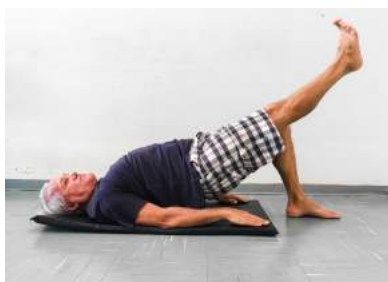

**Name:** Bridge with one leg

**Type:** Isometric

**Position A:** lie down on the mat, knees pointing to the ceiling, knees aligned with hips.

**Position B:** raise your hips up toward the ceiling then carefully take one leg off the floor. Hold for 15 up to 30 s.

**Sets:** 3 x 15-30 seconds

# SUPPLEMENTARY FILE

A



B

**Name: Clam shell****Type: Isotonic****Position A:** side lying position, elastic band around your thighs, knees bent.**Position B:** move your knee away, squeezing your buttocks then slowly return. Repeat with the other side/leg.**Sets: 3****Repetitions: 12**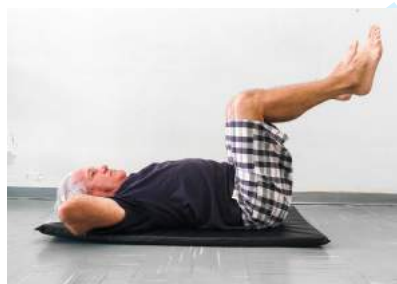**Name: Abdominal curls with lifted legs****Type: Isotonic****Position A:** lie down on the mat, place your hands behind your head, bend your knees and keep them aligned with hips. Lift both legs up.**Position B:** as you exhale, slowly lift your chest up; as you inhale, slowly lower your chest down. Avoid bringing your chin to your chest.**Sets: 3****Repetitions: 12****Name: Trunk extension****Type: Isometric****Position A:** lying on your belly (prone position).**Position B:** move your chest away from the floor. Look at the ground. Hold for 30 seconds at least.**Repetitions: 3 x 30 seconds**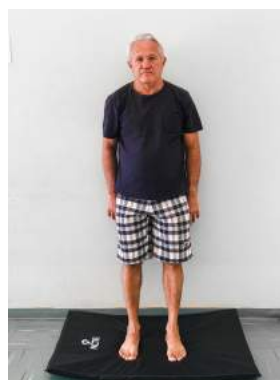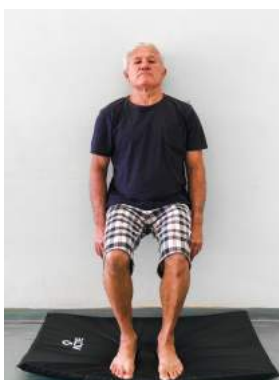**Name: Wall squat****Type: Isometric contraction****Position A:** stand with your trunk to a wall, feet aligned with knees and hips, and away from the wall.**Position B:** slide down and keep your trunk towards the wall. Hold for 30 seconds up to one minute.**Repetitions: 3**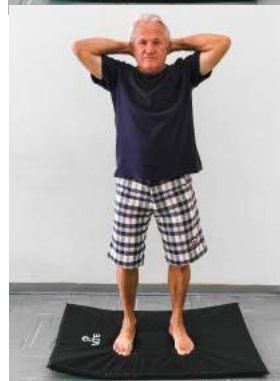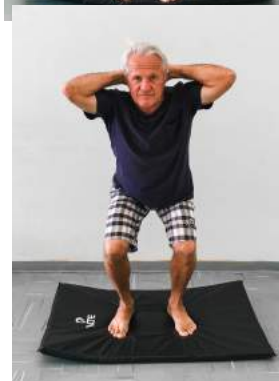**Name: Partial squat****Type: isotonic contraction****Position A:** standing on both legs.**Position B:** slowly bend your knees and stand up again. Maintain your knees over your feet.**Repetitions: 3**

# SUPPLEMENTARY FILE

A

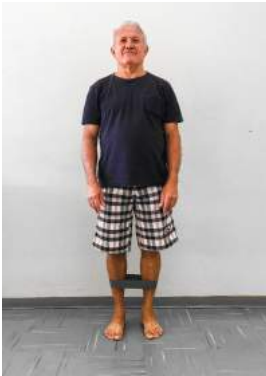

B

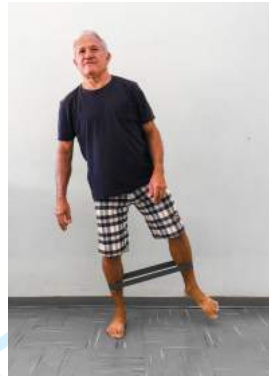

**Name:** Standing hip abduction.

**Type:** static balance

**Position A:** standing on both legs with an elastic band around both legs.

**Position B:** lift one leg out, maintain the kneecap pointing forward, and hold for 30 seconds or more.

**Repetitions:** 3 (each leg)

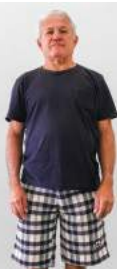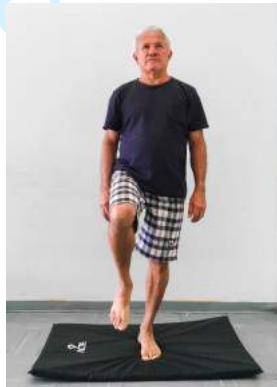

**Name:** Standing on one leg

**Type:** static balance on stable surface

**Position A:** standing on both legs, eyes opened.

**Position B:** standing on one leg, knee slightly bent, lift the other leg off the floor and maintain the position up to 1 minute.

**Repetitions:** 2 (each leg)

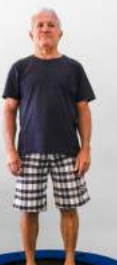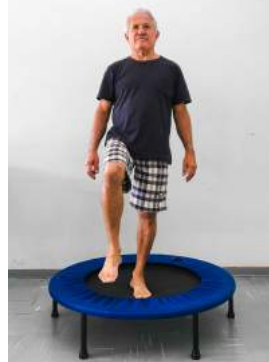

**Name:** Standing on one leg

**Type:** static balance on unstable surface (trampoline, foam etc)

**Position A:** standing on both legs, eyes opened.

**Position B:** standing on one leg, remove another leg from ground and maintain the position.

**Repetitions:** 2 (each leg)

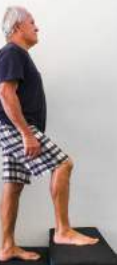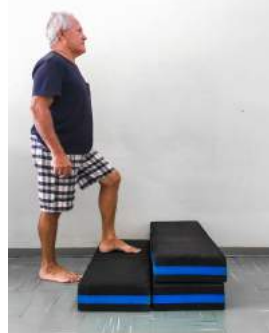

**Name:** Step-up

**Type:** isotonic contraction

**Position A:** on leg onto a step.

**Position B:** step up onto the next step, use the wall for balance if needed. Step back down carefully to the position A.

**Sets:** 2 (each leg)

**Repetitions:** 12

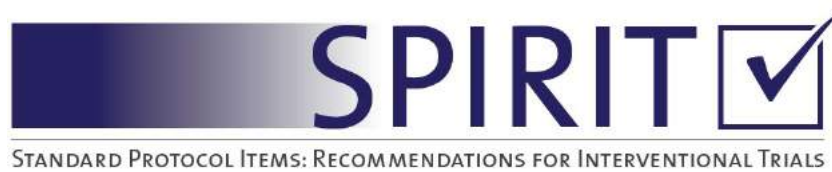

SPIRIT 2013 Checklist: Recommended items to address in a clinical trial protocol and related documents\*

| Section/item                      | Item No | Description                                                                                                                                                                                                                                                                                           |
|-----------------------------------|---------|-------------------------------------------------------------------------------------------------------------------------------------------------------------------------------------------------------------------------------------------------------------------------------------------------------|
| <b>Administrative information</b> |         |                                                                                                                                                                                                                                                                                                       |
| Title                             | 1       | Descriptive title identifying the study design, population, interventions, and, if applicable, trial acronym - <b>PAGE 01</b>                                                                                                                                                                         |
| Trial registration                | 2a      | Trial identifier and registry name. If not yet registered, name of intended registry - <b>PAGE 02</b>                                                                                                                                                                                                 |
|                                   | 2b      | All items from the World Health Organization Trial Registration Data Set - <b>N/A</b>                                                                                                                                                                                                                 |
| Protocol version                  | 3       | Date and version identifier - <b>N/A</b>                                                                                                                                                                                                                                                              |
| Funding                           | 4       | Sources and types of financial, material, and other support - <b>PAGE 14</b>                                                                                                                                                                                                                          |
| Roles and responsibilities        | 5a      | Names, affiliations, and roles of protocol contributors - <b>PAGE 01</b>                                                                                                                                                                                                                              |
|                                   | 5b      | Name and contact information for the trial sponsor - <b>N/A</b>                                                                                                                                                                                                                                       |
|                                   | 5c      | Role of study sponsor and funders, if any, in study design; collection, management, analysis, and interpretation of data; writing of the report; and the decision to submit the report for publication, including whether they will have ultimate authority over any of these activities - <b>N/A</b> |
|                                   | 5d      | Composition, roles, and responsibilities of the coordinating centre, steering committee, endpoint adjudication committee, data management team, and other individuals or groups overseeing the trial, if applicable (see Item 21a for data monitoring committee) - <b>N/A</b>                         |
| <b>Introduction</b>               |         |                                                                                                                                                                                                                                                                                                       |
| Background and rationale          | 6a      | Description of research question and justification for undertaking the trial, including summary of relevant studies (published and unpublished) examining benefits and harms for each intervention - <b>PAGES 4-5</b>                                                                                 |
|                                   | 6b      | Explanation for choice of comparators - <b>PAGES 4-5</b>                                                                                                                                                                                                                                              |
| Objectives                        | 7       | Specific objectives or hypotheses - <b>PAGES 4-5</b>                                                                                                                                                                                                                                                  |



1  
2  
3  
4  
5  
6  
7  
8  
9  
10  
11  
12  
13  
14  
15  
16  
17  
18  
19  
20  
21  
22  
23  
24  
25  
26  
27  
28  
29  
30  
31  
32  
33  
34  
35  
36  
37  
38  
39  
40  
41  
42  
43  
44  
45  
46  
47  
48  
49  
50  
51  
52  
53  
54  
55  
56  
57  
58  
59  
60

|              |   |                                                                                                                                                                                                                           |
|--------------|---|---------------------------------------------------------------------------------------------------------------------------------------------------------------------------------------------------------------------------|
| Trial design | 8 | Description of trial design including type of trial (eg, parallel group, crossover, factorial, single group), allocation ratio, and framework (eg, superiority, equivalence, noninferiority, exploratory) – <b>PAGE 6</b> |
|--------------|---|---------------------------------------------------------------------------------------------------------------------------------------------------------------------------------------------------------------------------|

### **Methods: Participants, interventions, and outcomes**

|               |   |                                                                                                                                                                                                    |
|---------------|---|----------------------------------------------------------------------------------------------------------------------------------------------------------------------------------------------------|
| Study setting | 9 | Description of study settings (eg, community clinic, academic hospital) and list of countries where data will be collected. Reference to where list of study sites can be obtained – <b>PAGE 6</b> |
|---------------|---|----------------------------------------------------------------------------------------------------------------------------------------------------------------------------------------------------|

|                      |    |                                                                                                                                                                                                              |
|----------------------|----|--------------------------------------------------------------------------------------------------------------------------------------------------------------------------------------------------------------|
| Eligibility criteria | 10 | Inclusion and exclusion criteria for participants. If applicable, eligibility criteria for study centres and individuals who will perform the interventions (eg, surgeons, psychotherapists) – <b>PAGE 7</b> |
|----------------------|----|--------------------------------------------------------------------------------------------------------------------------------------------------------------------------------------------------------------|

|               |     |                                                                                                                                                |
|---------------|-----|------------------------------------------------------------------------------------------------------------------------------------------------|
| Interventions | 11a | Interventions for each group with sufficient detail to allow replication, including how and when they will be administered – <b>PAGES 8-10</b> |
|---------------|-----|------------------------------------------------------------------------------------------------------------------------------------------------|

|  |     |                                                                                                                                                                                                                    |
|--|-----|--------------------------------------------------------------------------------------------------------------------------------------------------------------------------------------------------------------------|
|  | 11b | Criteria for discontinuing or modifying allocated interventions for a given trial participant (eg, drug dose change in response to harms, participant request, or improving/worsening disease) – <b>PAGES 8-10</b> |
|--|-----|--------------------------------------------------------------------------------------------------------------------------------------------------------------------------------------------------------------------|

|  |     |                                                                                                                                                                       |
|--|-----|-----------------------------------------------------------------------------------------------------------------------------------------------------------------------|
|  | 11c | Strategies to improve adherence to intervention protocols, and any procedures for monitoring adherence (eg, drug tablet return, laboratory tests) – <b>PAGES 8-10</b> |
|--|-----|-----------------------------------------------------------------------------------------------------------------------------------------------------------------------|

|  |     |                                                                                                                   |
|--|-----|-------------------------------------------------------------------------------------------------------------------|
|  | 11d | Relevant concomitant care and interventions that are permitted or prohibited during the trial – <b>PAGES 8-10</b> |
|--|-----|-------------------------------------------------------------------------------------------------------------------|

|          |    |                                                                                                                                                                                                                                                                                                                                                                                                     |
|----------|----|-----------------------------------------------------------------------------------------------------------------------------------------------------------------------------------------------------------------------------------------------------------------------------------------------------------------------------------------------------------------------------------------------------|
| Outcomes | 12 | Primary, secondary, and other outcomes, including the specific measurement variable (eg, systolic blood pressure), analysis metric (eg, change from baseline, final value, time to event), method of aggregation (eg, median, proportion), and time point for each outcome. Explanation of the clinical relevance of chosen efficacy and harm outcomes is strongly recommended – <b>PAGES 10-11</b> |
|----------|----|-----------------------------------------------------------------------------------------------------------------------------------------------------------------------------------------------------------------------------------------------------------------------------------------------------------------------------------------------------------------------------------------------------|

|                      |    |                                                                                                                                                                                                   |
|----------------------|----|---------------------------------------------------------------------------------------------------------------------------------------------------------------------------------------------------|
| Participant timeline | 13 | Time schedule of enrolment, interventions (including any run-ins and washouts), assessments, and visits for participants. A schematic diagram is highly recommended (see Figure) – <b>PAGE 22</b> |
|----------------------|----|---------------------------------------------------------------------------------------------------------------------------------------------------------------------------------------------------|

|             |    |                                                                                                                                                                                                        |
|-------------|----|--------------------------------------------------------------------------------------------------------------------------------------------------------------------------------------------------------|
| Sample size | 14 | Estimated number of participants needed to achieve study objectives and how it was determined, including clinical and statistical assumptions supporting any sample size calculations – <b>PAGE 12</b> |
|-------------|----|--------------------------------------------------------------------------------------------------------------------------------------------------------------------------------------------------------|

|             |    |                                                                                                     |
|-------------|----|-----------------------------------------------------------------------------------------------------|
| Recruitment | 15 | Strategies for achieving adequate participant enrolment to reach target sample size – <b>PAGE 7</b> |
|-------------|----|-----------------------------------------------------------------------------------------------------|

### **Methods: Assignment of interventions (for controlled trials)**

Allocation:

|    |                                                           |     |                                                                            |
|----|-----------------------------------------------------------|-----|----------------------------------------------------------------------------|
| 1  |                                                           |     |                                                                            |
| 2  | Sequence                                                  | 16a | Method of generating the allocation sequence (eg, computer-                |
| 3  | generation                                                |     | generated random numbers), and list of any factors for stratification.     |
| 4  |                                                           |     | To reduce predictability of a random sequence, details of any planned      |
| 5  |                                                           |     | restriction (eg, blocking) should be provided in a separate document       |
| 6  |                                                           |     | that is unavailable to those who enrol participants or assign              |
| 7  |                                                           |     | interventions <b>- PAGE 12</b>                                             |
| 8  |                                                           |     |                                                                            |
| 9  |                                                           |     |                                                                            |
| 10 | Allocation                                                | 16b | Mechanism of implementing the allocation sequence (eg, central             |
| 11 | concealment                                               |     | telephone; sequentially numbered, opaque, sealed envelopes),               |
| 12 | mechanism                                                 |     | describing any steps to conceal the sequence until interventions are       |
| 13 |                                                           |     | assigned <b>- PAGE 12</b>                                                  |
| 14 |                                                           |     |                                                                            |
| 15 | Implementation                                            | 16c | Who will generate the allocation sequence, who will enrol participants,    |
| 16 |                                                           |     | and who will assign participants to interventions <b>- PAGE 12</b>         |
| 17 |                                                           |     |                                                                            |
| 18 |                                                           |     |                                                                            |
| 19 | Blinding                                                  | 17a | Who will be blinded after assignment to interventions (eg, trial           |
| 20 | (masking)                                                 |     | participants, care providers, outcome assessors, data analysts), and       |
| 21 |                                                           |     | how <b>- PAGES 8, 10</b>                                                   |
| 22 |                                                           |     |                                                                            |
| 23 |                                                           | 17b | If blinded, circumstances under which unblinding is permissible, and       |
| 24 |                                                           |     | procedure for revealing a participant's allocated intervention during      |
| 25 |                                                           |     | the trial <b>- N/A</b>                                                     |
| 26 |                                                           |     |                                                                            |
| 27 |                                                           |     |                                                                            |
| 28 | <b>Methods: Data collection, management, and analysis</b> |     |                                                                            |
| 29 |                                                           |     |                                                                            |
| 30 | Data collection                                           | 18a | Plans for assessment and collection of outcome, baseline, and other        |
| 31 | methods                                                   |     | trial data, including any related processes to promote data quality (eg,   |
| 32 |                                                           |     | duplicate measurements, training of assessors) and a description of        |
| 33 |                                                           |     | study instruments (eg, questionnaires, laboratory tests) along with        |
| 34 |                                                           |     | their reliability and validity, if known. Reference to where data          |
| 35 |                                                           |     | collection forms can be found, if not in the protocol <b>- PAGES 12-13</b> |
| 36 |                                                           |     |                                                                            |
| 37 |                                                           |     |                                                                            |
| 38 |                                                           | 18b | Plans to promote participant retention and complete follow-up,             |
| 39 |                                                           |     | including list of any outcome data to be collected for participants who    |
| 40 |                                                           |     | discontinue or deviate from intervention protocols <b>- PAGES 12-13</b>    |
| 41 |                                                           |     |                                                                            |
| 42 | Data                                                      | 19  | Plans for data entry, coding, security, and storage, including any         |
| 43 | management                                                |     | related processes to promote data quality (eg, double data entry;          |
| 44 |                                                           |     | range checks for data values). Reference to where details of data          |
| 45 |                                                           |     | management procedures can be found, if not in the protocol <b>- PAGE</b>   |
| 46 |                                                           |     | <b>12-13</b>                                                               |
| 47 |                                                           |     |                                                                            |
| 48 |                                                           |     |                                                                            |
| 49 | Statistical                                               | 20a | Statistical methods for analysing primary and secondary outcomes.          |
| 50 | methods                                                   |     | Reference to where other details of the statistical analysis plan can be   |
| 51 |                                                           |     | found, if not in the protocol <b>- PAGES 12-13</b>                         |
| 52 |                                                           |     |                                                                            |
| 53 |                                                           |     |                                                                            |
| 54 |                                                           | 20b | Methods for any additional analyses (eg, subgroup and adjusted             |
| 55 |                                                           |     | analyses) <b>- PAGES 12-13</b>                                             |
| 56 |                                                           |     |                                                                            |
| 57 |                                                           | 20c | Definition of analysis population relating to protocol non-adherence       |
| 58 |                                                           |     | (eg, as randomised analysis), and any statistical methods to handle        |
| 59 |                                                           |     | missing data (eg, multiple imputation) <b>- PAGES 12-13</b>                |
| 60 |                                                           |     |                                                                            |

## Methods: Monitoring

|                 |     |                                                                                                                                                                                                                                                                                                                                                  |
|-----------------|-----|--------------------------------------------------------------------------------------------------------------------------------------------------------------------------------------------------------------------------------------------------------------------------------------------------------------------------------------------------|
| Data monitoring | 21a | Composition of data monitoring committee (DMC); summary of its role and reporting structure; statement of whether it is independent from the sponsor and competing interests; and reference to where further details about its charter can be found, if not in the protocol. Alternatively, an explanation of why a DMC is not needed <b>N/A</b> |
|                 | 21b | Description of any interim analyses and stopping guidelines, including who will have access to these interim results and make the final decision to terminate the trial <b>- N/A</b>                                                                                                                                                             |
| Harms           | 22  | Plans for collecting, assessing, reporting, and managing solicited and spontaneously reported adverse events and other unintended effects of trial interventions or trial conduct <b>- PAGES 6-8</b>                                                                                                                                             |
| Auditing        | 23  | Frequency and procedures for auditing trial conduct, if any, and whether the process will be independent from investigators and the sponsor <b>- N/A</b>                                                                                                                                                                                         |

## Ethics and dissemination

|                               |     |                                                                                                                                                                                                                                                   |
|-------------------------------|-----|---------------------------------------------------------------------------------------------------------------------------------------------------------------------------------------------------------------------------------------------------|
| Research ethics approval      | 24  | Plans for seeking research ethics committee/institutional review board (REC/IRB) approval <b>- PAGES 13, 14</b>                                                                                                                                   |
| Protocol amendments           | 25  | Plans for communicating important protocol modifications (eg, changes to eligibility criteria, outcomes, analyses) to relevant parties (eg, investigators, REC/IRBs, trial participants, trial registries, journals, regulators) <b>- PAGE 13</b> |
| Consent or assent             | 26a | Who will obtain informed consent or assent from potential trial participants or authorised surrogates, and how (see Item 32) <b>- PAGE 13</b>                                                                                                     |
|                               | 26b | Additional consent provisions for collection and use of participant data and biological specimens in ancillary studies, if applicable <b>N/A</b>                                                                                                  |
| Confidentiality               | 27  | How personal information about potential and enrolled participants will be collected, shared, and maintained in order to protect confidentiality before, during, and after the trial <b>- PAGES 06, 07</b>                                        |
| Declaration of interests      | 28  | Financial and other competing interests for principal investigators for the overall trial and each study site <b>- PAGE 14</b>                                                                                                                    |
| Access to data                | 29  | Statement of who will have access to the final trial dataset, and disclosure of contractual agreements that limit such access for investigators <b>N/A</b>                                                                                        |
| Ancillary and post-trial care | 30  | Provisions, if any, for ancillary and post-trial care, and for compensation to those who suffer harm from trial participation <b>N/A</b>                                                                                                          |

- 1  
2  
3  
4  
5  
6  
7  
8  
9  
10  
11  
12  
13  
14  
15
- |                      |     |                                                                                                                                                                                                                                                                                                           |
|----------------------|-----|-----------------------------------------------------------------------------------------------------------------------------------------------------------------------------------------------------------------------------------------------------------------------------------------------------------|
| Dissemination policy | 31a | Plans for investigators and sponsor to communicate trial results to participants, healthcare professionals, the public, and other relevant groups (eg, via publication, reporting in results databases, or other data sharing arrangements), including any publication restrictions — <b>PAGES 13, 14</b> |
|                      | 31b | Authorship eligibility guidelines and any intended use of professional writers <b>N/A</b>                                                                                                                                                                                                                 |
|                      | 31c | Plans, if any, for granting public access to the full protocol, participant-level dataset, and statistical code — <b>PAGE S13, 14</b>                                                                                                                                                                     |

## 16 Appendices

- 17  
18  
19  
20  
21  
22  
23  
24
- |                            |    |                                                                                                                                                                                                           |
|----------------------------|----|-----------------------------------------------------------------------------------------------------------------------------------------------------------------------------------------------------------|
| Informed consent materials | 32 | Model consent form and other related documentation given to participants and authorised surrogates <b>N/A</b>                                                                                             |
| Biological specimens       | 33 | Plans for collection, laboratory evaluation, and storage of biological specimens for genetic or molecular analysis in the current trial and for future use in ancillary studies, if applicable <b>N/A</b> |

---

25 \*It is strongly recommended that this checklist be read in conjunction with the SPIRIT 2013  
26 Explanation & Elaboration for important clarification on the items. Amendments to the  
27 protocol should be tracked and dated. The SPIRIT checklist is copyrighted by the SPIRIT  
28 Group under the Creative Commons "[Attribution-NonCommercial-NoDerivs 3.0 Unported](https://creativecommons.org/licenses/by-nc-nd/3.0/)"  
29 license.  
30  
31  
32  
33  
34  
35  
36  
37  
38  
39  
40  
41  
42  
43  
44  
45  
46  
47  
48  
49  
50  
51  
52  
53  
54  
55  
56  
57  
58  
59  
60



# BMJ Open

## CRYOTHERAPY ASSOCIATED WITH TAILORED LAND-BASED EXERCISES FOR KNEE OSTEOARTHRITIS: A PROTOCOL FOR A DOUBLE-BLIND SHAM CONTROLLED RANDOMIZED TRIAL

|                                 |                                                                                                                                                                                                                                                                                                                                                                                                                                                                                                  |
|---------------------------------|--------------------------------------------------------------------------------------------------------------------------------------------------------------------------------------------------------------------------------------------------------------------------------------------------------------------------------------------------------------------------------------------------------------------------------------------------------------------------------------------------|
| Journal:                        | <i>BMJ Open</i>                                                                                                                                                                                                                                                                                                                                                                                                                                                                                  |
| Manuscript ID                   | bmjopen-2019-035610.R2                                                                                                                                                                                                                                                                                                                                                                                                                                                                           |
| Article Type:                   | Protocol                                                                                                                                                                                                                                                                                                                                                                                                                                                                                         |
| Date Submitted by the Author:   | 11-Mar-2020                                                                                                                                                                                                                                                                                                                                                                                                                                                                                      |
| Complete List of Authors:       | Ogura Dantas, Lucas; Federal University of Sao Carlos, Physiotherapy Serafim Jorge, Ana Elisa; Federal University of Sao Carlos, Physiotherapy Serrao, Paula; Federal University of Sao Carlos, Physiotherapy Sendín, Francisco; Universidad de Córdoba, Sociosanitary Sciences, Radiology and Physical Medicine, University of Córdoba, Córdoba, Spain and Instituto Maiomónides de Investigación Biomédica de Córdoba (IMIBIC) Salvini, Tania; Federal University of Sao Carlos, Physiotherapy |
| <b>Primary Subject Heading</b>: | Rheumatology                                                                                                                                                                                                                                                                                                                                                                                                                                                                                     |
| Secondary Subject Heading:      | Rheumatology, Rehabilitation medicine                                                                                                                                                                                                                                                                                                                                                                                                                                                            |
| Keywords:                       | PAIN MANAGEMENT, REHABILITATION MEDICINE, PUBLIC HEALTH                                                                                                                                                                                                                                                                                                                                                                                                                                          |
|                                 |                                                                                                                                                                                                                                                                                                                                                                                                                                                                                                  |

SCHOLARONE™  
Manuscripts

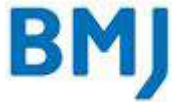

I, the Submitting Author has the right to grant and does grant on behalf of all authors of the Work (as defined in the below author licence), an exclusive licence and/or a non-exclusive licence for contributions from authors who are: i) UK Crown employees; ii) where BMJ has agreed a CC-BY licence shall apply, and/or iii) in accordance with the terms applicable for US Federal Government officers or employees acting as part of their official duties; on a worldwide, perpetual, irrevocable, royalty-free basis to BMJ Publishing Group Ltd ("BMJ") its licensees and where the relevant Journal is co-owned by BMJ to the co-owners of the Journal, to publish the Work in this journal and any other BMJ products and to exploit all rights, as set out in our [licence](#).

The Submitting Author accepts and understands that any supply made under these terms is made by BMJ to the Submitting Author unless you are acting as an employee on behalf of your employer or a postgraduate student of an affiliated institution which is paying any applicable article publishing charge ("APC") for Open Access articles. Where the Submitting Author wishes to make the Work available on an Open Access basis (and intends to pay the relevant APC), the terms of reuse of such Open Access shall be governed by a Creative Commons licence – details of these licences and which [Creative Commons](#) licence will apply to this Work are set out in our licence referred to above.

Other than as permitted in any relevant BMJ Author's Self Archiving Policies, I confirm this Work has not been accepted for publication elsewhere, is not being considered for publication elsewhere and does not duplicate material already published. I confirm all authors consent to publication of this Work and authorise the granting of this licence.

1 **TITLE:** CRYOTHERAPY ASSOCIATED WITH TAILORED LAND-BASED EXERCISES  
2 FOR KNEE OSTEOARTHRITIS: A PROTOCOL FOR A DOUBLE-BLIND SHAM  
3 CONTROLLED RANDOMIZED TRIAL

4  
5 Lucas Ogura Dantas<sup>1</sup>, PT; Ana Elisa Serafim Jorge<sup>1</sup>, PT, MSc, PhD; Paula Regina Mendes Silva  
6 Serrao<sup>1</sup>, PT, MSc, PhD; Francisco Albuquerque-Sendín<sup>2</sup>, PT, MSc, PhD; Tania Fatima Salvini<sup>1</sup>,  
7 PT, MSc, PhD.

8  
9 **Author Affiliations:** <sup>1</sup>Physical Therapy Department, Federal University of São Carlos, São  
10 Carlos, Brazil. <sup>2</sup>Sociosanitary Sciences, Radiology and Physical Medicine, University of Córdoba,  
11 Córdoba, Spain and Instituto Maiomónides de Investigación Biomédica de Córdoba (IMIBIC),  
12 Córdoba, Spain.

13  
14 **Corresponding Author:** Tania Fatima Salvini, PT, MSc, PhD. Neuromuscular Plasticity  
15 Laboratory, Physical Therapy Department, Federal University of São Carlos, Rodovia Washington  
16 Luiz, Km 235, CEP:13.565-905, CxP: 676, São Carlos, SP, Brazil ([tania@ufscar.br](mailto:tania@ufscar.br))

## 1    2    3    4    5    6    7    8    9    10    11    12    13    14    15    16    17    18    19    20    21    22    23    24    25    26    27    28    29    30    31    32    33    34    35    36    37    38    39    40    41    42    43    44    45    46    47    48    49    50    51    52    53    54    55    56    57    58    59    60

1    **ABSTRACT**

2    **Introduction:** There is an unmet need to develop tailored therapeutic exercise protocols applying

3    different treatment parameters and modalities for individuals with knee osteoarthritis (KOA).

4    Cryotherapy is widely used in rehabilitation as an adjunct treatment due to its effects on pain and

5    the inflammatory process. However, disagreement between KOA guidelines remains with respect

6    to its recommendation status. The aim of this study is to verify the complementary effects of

7    cryotherapy when associated with a tailored therapeutic exercise protocol on patients with KOA.

8    **Methods and analysis:** This study is a sham-controlled, randomized trial with concealed

9    allocation and intention-to-treat analysis. Assessments will be performed at baseline and

10    immediately following the intervention period. To check for residual effects of the interventions

11    applied, three- and six-month follow-up assessments will be performed. Participants will be

12    community members living with KOA. There will be three groups: (1) the experimental group that

13    will receive a tailored therapeutic exercise protocol followed by a cryotherapy session of 20

14    minutes; (2) the sham control group that will receive the same regimen as the first group, but with

15    sham packs filled with dry sand; and (3) the active treatment control group that will receive only

16    the therapeutic exercise protocol. The primary outcome will be pain intensity according to a Visual

17    Analogue Scale. Secondary outcomes will be the Western Ontario & McMaster Universities

18    Osteoarthritis Index; the Medical Outcomes Survey Short-Form 36 questionnaire; the 30-Second

19    Chair Stand Test; the Stair Climb test; and the 40-Meter fast-paced walk test.

20    **Ethics and dissemination:** The trial was approved by the Institutional Ethics Committee of

21    Federal University of Sao Carlos, São Paulo, Brazil. Registration approval number: CAAE:

22    65966617.9.0000.5504. The results will be published in peer-reviewed journals.

23    **Trial registration number:** NCT03360500

1  
2  
3 **1 Strengths and limitations of this study:**  
4

- 5 2     ▪ The trial will be conducted according to well-established reporting guidelines.  
6  
7  
8 3     ▪ Participants will present with radiographically confirmed knee osteoarthritis and a  
9  
10 4     sufficient level of pain to ensure ample scope for improvement.  
11  
12 5     ▪ The trial will use both subjective and objective outcome measures.  
13  
14  
15 6     ▪ The therapist who delivers cryotherapy or the sham intervention and the patients will not  
16  
17 7     be blinded.  
18  
19 8     ▪ The loss to follow-up after randomization in the sham group might be higher than those in  
20  
21 9     the other groups.  
22  
23  
24 10  
25  
26 11  
27  
28 12  
29  
30 13  
31  
32 14  
33  
34 15  
35  
36 16  
37  
38 17  
39  
40  
41  
42  
43  
44  
45  
46  
47  
48  
49  
50  
51  
52  
53  
54  
55  
56  
57  
58  
59  
60

1 Knee osteoarthritis (KOA) is a serious disease with a high societal and economic burden,<sup>1</sup> affecting  
2 approximately 250 million people worldwide.<sup>2</sup> Current clinical practice guidelines recommend a  
3 combination of pharmacological<sup>3</sup> and non-pharmacological<sup>4</sup> treatment strategies to manage KOA  
4 symptoms and improve patients' quality of life. However, pharmacological treatment options that  
5 have been proven to relieve symptoms remain limited, and some of the most commonly  
6 recommended pharmacologic treatments are poorly tolerated, with long-term use resulting in  
7 serious systemic adverse events.<sup>5-7</sup>

8  
9 Physical Therapy, specifically the use of strengthening therapeutic exercise (STE) protocols, have  
10 been shown to relieve pain, reduce stiffness, increase physical function, and improve quality of  
11 life in patients with KOA.<sup>1,8</sup> High-quality evidence has demonstrated that the benefits of STE  
12 protocols on pain and quality of life in individuals with KOA are sustained for at least two to six  
13 months after the end of a treatment.<sup>8</sup> There is, however, a call for further research to develop novel  
14 insights within STE protocols regarding differences in treatment durations, frequencies,  
15 modalities, and intensities.<sup>9</sup> The majority of current protocols have reported low adherence and are  
16 substantially under-utilized by KOA patients, mainly due to socioeconomic barriers, personal  
17 beliefs, fear of movement, and aggravation of pain in the early phases of treatment.<sup>10,11</sup> Therefore,  
18 there is an unmet need for cost-effective, evidence-based STE protocols that are tailored to the  
19 needs of KOA patients, and that can aid clinicians in targeting rehabilitation goals.

20  
21 Physical modalities such as thermal agents, laser therapy, therapeutic ultrasound, and electrical  
22 stimulation are often used as adjunct treatments with therapeutic exercises in individuals with  
23 KOA.<sup>4,12</sup> Cryotherapy, a non-pharmacological intervention, has been widely used in some

1 rheumatic joint diseases<sup>13,14</sup> based on its effects on pain, inflammation, and edema.<sup>15,16</sup> The  
2 intervention is considered safe, and is inexpensive and easy to administer for healthcare  
3 professionals and patients. Moreover, it can be prescribed in isolation or as an adjunct treatment  
4 and seems to be well accepted by individuals with KOA.<sup>14,17,18</sup> Although cryotherapy is  
5 recommended as a treatment option by some international KOA guidelines,<sup>19,20</sup> others have found  
6 insufficient evidence to support it.<sup>21-23</sup> Relevant systematic reviews have likewise concluded that  
7 further evidence, produced with greater methodological rigor, is needed to evaluate the effects of  
8 cryotherapy on pain, function, and quality of life in individuals with KOA.<sup>16,24</sup>

9  
10 In this study, we aim to design a randomized trial to verify the complementary effects of  
11 cryotherapy in conjunction with a tailored STE protocol on pain, function, and quality of life in  
12 individuals with KOA. We hypothesize that cryotherapy combined with the STE protocol will  
13 achieve better treatment effects on KOA patients when compared to the other two groups. The  
14 proposed trial will contribute new evidence to the Physical Therapy field in KOA by focusing on  
15 interventions that target rehabilitation and enhance pain management, thereby improving the  
16 physical function and quality of life of these patients. Our research group developed the STE  
17 protocol described in this study. The protocol was also used in another randomized trial testing the  
18 complementary effects of Photobiomodulation in individuals with KOA (trial registration number  
19 at [www.ensaiosclinicos.gov.br](http://www.ensaiosclinicos.gov.br): U1111-1215-6510). This manuscript has been submitted  
20 simultaneously with the manuscript entitled “Photobiomodulation therapy associated with  
21 supervised therapeutic exercises for people with knee osteoarthritis: a protocol for randomized  
22 trials” (ID bmjopen-2019-035711).





1 interfere with the STE protocol. A verbal and written explanation of the objectives and  
2 methodology of the study will be provided to all the participants, and those willing to participate  
3 will sign a written informed consent form, approved by the local ethics committee. A detailed  
4 timeline of the trial is presented in **Table 1**.

## 6 **Patient and Public Involvement**

7 The patients and the public were not involved in the planning and design of this study.

## 9 **Participants**

10 Participants will be recruited through public announcements on social media, advertisements via  
11 local news outlets, University community newsletters, and banners or leaflets posted at strategic  
12 locations in the city. People who are interested in participating in the study will first be screened  
13 to check the eligibility criteria. Eligible participants will then undergo a lateral, anteroposterior,  
14 and axial radiography of both knees to determine KOA severity, which will take place at the  
15 University Hospital. Participants will be classified with KOA based on the clinical and  
16 radiographic criteria of the American College of Rheumatology,<sup>29</sup> and will be required to have  
17 symptoms and a radiographic grade (Kellgren and Lawrence scale) of  $\geq 2$  (mild radiographic OA)  
18 in at least one knee compartment.<sup>26</sup>

19  
20 To be included in the study, participants will also need to: be between 40 and 75 years old; be  
21 engaged in a total of less than 45 minutes/week of physical activity of at least moderate intensity<sup>30</sup>;  
22 have a body mass index  $< 35 \text{ kg/m}^2$ ; and to have reported pain intensity in the prior week of  $\geq 4 \text{ cm}$   
23 on a 10-cm visual analogue scale.<sup>26</sup> Exclusion criteria will comprise physical therapy in the prior

1 three months; intra-articular knee injections in the prior six months; medical restrictions such as  
2 cardiorespiratory, neurological, or any other rheumatology conditions; previous hip, knee, or ankle  
3 surgery; and any other chronic condition that leads to chronic pain or dysfunction. Additionally,  
4 participants presenting with contraindication(s) to cryotherapy application (i.e., those that feel a  
5 high level of discomfort or pain during the application) will be excluded.

6 All the participants will be asked to provide a medical certificate stating that they are healthy  
7 enough to perform physical activities before the start of the intervention.

8

## 9 **Interventions**

10 The intervention protocol is based on a previously accepted methodology developed in our  
11 research laboratory.<sup>31</sup> Two physical therapists will administer the interventions in the  
12 physiotherapy clinic of the University. The study will take place over the course of eight weeks,  
13 with three 90-minute sessions per week occurring on non-consecutive days, for a total of 24  
14 sessions. All randomized participants will perform the STE protocol and then, according to random  
15 allocation, each patient will subsequently receive either cryotherapy or sham interventions in  
16 individual rooms.

17

18 Prior to the beginning of the study, the therapists responsible for the interventions will participate  
19 in a 10-hour training module, which will consist of scientific information and clinical training  
20 regarding KOA, the STE protocol, and the use of cryotherapy. After the first training module is  
21 completed, the therapists will do an eight-week training module, which will consist of practicing  
22 the full-length protocol and intervention application(s) three times per week. Both therapists will  
23 be responsible for delivering cryotherapy and sham interventions.

### 1 STE protocol

2 We designed the 8-week land-based supervised exercise protocol according to the evidence-based  
3 recommendations for physical exercise interventions in KOA.<sup>32,33</sup> The STE protocol  
4 characteristics are described in **Figure 1**, and a detailed description of all the exercises is presented  
5 in the **Supplementary file** of this protocol. The protocol is divided into two phases. Each phase  
6 consists of 4 weeks of progressive exercises, performed three times per week on non-consecutive  
7 days (24 hours rest between sessions), with exercise intensity individually tailored for each  
8 participant. The first session is used to demonstrate and explain the STE protocol, and to perform  
9 an exercise familiarization using no loads by the participants. The second session is designed to  
10 estimate the initial resistance of each participant for each exercise. The volitional interruption  
11 method is used in order to achieve the benefits of resistance training and to reduce the risk of  
12 musculoskeletal injuries to the participants.<sup>34</sup> The loads are gradually increased until the  
13 participant can adequately perform 12 repetitions with no voluntary interruption due to muscle  
14 fatigue.

15  
16 The STE protocol sessions consist of three phases. The first phase is a 10-minute warm-up in  
17 which the patients can choose, according to their preferences, to walk in a comfortable intensity in  
18 an outdoor circuit, treadmill, or ride in a stationary bicycle. The second phase consists of 40  
19 minutes of strengthening exercises (resistance training), such as a lower limb and trunk muscles,  
20 and neuromuscular training involving balance exercises. The third phase is a cool-down phase,  
21 consisting of static stretching exercises to reduce the risk of musculoskeletal injuries and to  
22 maximize the benefit of the STE protocol.<sup>35</sup> Cardiac and respiratory frequencies and blood  
23 pressure are monitored at the beginning of each session or if the participant presents an intense

1 rate of perceived exertion according to the Borg scale while performing an exercise, to ensure  
2  
3  
4  
5 patient safety.<sup>36,37</sup>  
6  
7

#### 8 9 10 *Cryotherapy protocol*

11 To apply cryotherapy, the therapist will explain to the patient that the intervention will consist of  
12  
13 crushed ice applied to the more-affected knee for 20 minutes. Participants will be positioned in  
14  
15 dorsal decubitus with both legs extended and relaxed. The entire knee surface will be covered with  
16  
17 a moist surgical gauze (45 × 50 × 0.01 cm) to protect the skin from possible frostbite. Next, two  
18  
19 plastic bags (24 × 34 × 0.08 cm), each containing 1 kg of crushed ice, will be placed on the knee,  
20  
21 covering the anterior, posterior, medial, and lateral surfaces. A comfortable, non-painful  
22  
23 compression will be applied over the ice packs by wrapping an elastic bandage around them, and  
24  
25 the therapy will be left in situ, uninterrupted, for 20 minutes. The primary purpose of compression  
26  
27 is to maintain the ice packs in position on the knee<sup>38</sup> and to enhance cryotherapy effects.<sup>39</sup>  
28  
29  
30  
31  
32

33  
34  
35 For the sham cryotherapy intervention, the bags will be filled with 1 kg of dry sand instead of ice.  
36  
37 The sandbags will be applied according to the same regimen in the same locations. The therapist's  
38  
39 explanation about the intervention will be changed to mention the 'application of sand packs'  
40  
41 instead of 'cryotherapy application.' The sandbags will be applied with the same gauze underneath  
42  
43 and the same bandage for compression.  
44  
45  
46

#### 47 48 49 **Outcome measures**

50  
51 The same blinded assessor will measure all outcomes before and after the intervention, and at the  
52  
53 3- and 6-month follow-up periods. Before the study begins, the two outcome assessors will be  
54  
55  
56  
57  
58  
59

1 trained to conduct interviews and perform data collection following a standard protocol. **Table 2**  
2 describes the outcome measures that will be included in the trial and the recommended estimate  
3 of the minimum clinically important difference (MCID) for each outcome measure. We will  
4 measure pain intensity, subjective and objective physical function, and quality of life.

#### 6 *Primary outcome*

7 The primary outcome will be pain intensity at rest, assessed with a Visual Analogue Scale (VAS).  
8 This self-reported pain score is a valid and reliable measure for KOA.<sup>40</sup> The VAS will be  
9 administered at rest and after each physical function test, occurring at baseline, on the final  
10 assessment day, and at the 3- and 6-month follow-up periods.

#### 12 *Secondary outcomes*

13 To subjectively assess physical function and associated problems, the Western Ontario &  
14 McMaster Universities Osteoarthritis Index (WOMAC) will be used. WOMAC is a frequently  
15 used questionnaire in KOA and is translated, reproducible, and valid to Brazilian Portuguese.<sup>41</sup>  
16 The Medical Outcomes Survey Short-Form 36 (SF-36) questionnaire will be used to assess quality  
17 of life. The questionnaire is translated, reproducible, and valid to use in Brazilian Portuguese.<sup>42</sup>  
18 Three objective physical function tests will also be used: The 30-Second Chair Stand test, the Stair  
19 Climb test, and the 40-Meter fast-paced walk test. The questionnaires and physical function tests  
20 described are well-established core assessment measures of pain and physical function in patients  
21 with KOA, and presenting good scores for reliability, validity, and ability to detect change.<sup>43-47</sup>

## 1 **Randomization**

2 Eligible patients who consent to participate will be randomly allocated into three groups of 40: (1)  
3 active control group that will receive the STE protocol only, (2) STE + cryotherapy group, and (3)  
4 STE + sham cryotherapy group. The allocation of patients will be performed using permuted block  
5 randomization stratified by gender (20 men and 20 women in each group); randomization  
6 sequences will be determined by a computer-generated random numbers program  
7 (www.randomization.com). Allocation will be concealed by placing randomization assignments  
8 in opaque sealed envelopes that will be locked in a central location. A biostatistician will be  
9 responsible for generating the random numbers and each participant's random allocation will be  
10 revealed to the therapist administering the intervention just before study onset.<sup>26</sup>

## 12 ***Sample size***

13 We aim to detect a minimum clinically important difference (MCID) of 1.75 cm units on the VAS  
14 for pain intensity at rest.<sup>48</sup> Also, we aim to detect an MCID of 30 points on the WOMAC global  
15 score.<sup>49</sup> Calculations were based on an analysis of covariance adjusting for baseline outcome  
16 scores, assuming between-patient standard deviations of 2.0 cm for pain and 45 points for  
17 WOMAC global score. Based on these criteria, to achieve a significance level of 0.05 and a power  
18 of 0.80%, 37 participants with KOA will be required in each group. We will recruit 40 participants  
19 per group to allow possible dropouts during the intervention period.

## 21 ***Data analysis***

22 The analyses will be performed by a blinded biostatistician using commercial software. The  
23 Kolmogorov-Smirnov test will be applied to evaluate the normality of data distribution. If the

1 distribution is not normal, non-parametric tests will be used. For normal distributions, a 2-factor  
2 analysis of variance (ANOVA) will be conducted for the primary outcome (visual analogue scale  
3 for pain) and secondary outcomes, with time (baseline, post-intervention, and follow-up) as the  
4 within-subject factor and group (STE, STE + cryotherapy, STE + sham cryotherapy) as the  
5 between-subject factor. In addition, Tukey's test will be used for post-hoc analysis when  
6 necessary, and an intention-to-treat analysis will be performed for all randomized participants. All  
7 the missing data will be replaced using the expectation-maximization method. Between-group  
8 differences and their 95% confidence intervals will be reported and interpreted against the  
9 nominated thresholds for MCID. For the outcomes where the MCID is not nominated, Cohen's *d*  
10 coefficient will be calculated to aid interpretation. An effect size greater than 0.8 will be considered  
11 large, around 0.5 moderate, and less than or equal to 0.2, small<sup>50</sup>.

## 13 **ETHICS AND DISSEMINATION**

14 The Institutional Ethics Committee of the Federal University of Sao Carlos, São Paulo, Brazil,  
15 approved the under the registration approval number: CAAE: 65966617.9.0000.5504. The trial  
16 will be conducted according to the Helsinki Statement. All participants will provide written  
17 informed consent following a verbal and written explanation of the study protocol. Participants  
18 will be free to withdraw from the trial at any time without prejudice to future treatment. Results  
19 will be presented at scientific meetings and published in peer-reviewed journals. All publications  
20 and presentations related to the study will be authorized and reviewed by the study investigators.

## 1 TRIAL STATUS

2 The trial is currently recruiting and is expected to be completed (including follow-up testing) by  
3 December 2020.

## 5 AUTHORS CONTRIBUTION

6 L.O.D., A.E.S.J., P.R.S., F.A.S., and T.F.S. designed the study protocol. L.O.D. wrote the first  
7 draft of the manuscript, and together with A.E.S.J., P.R.S., F.A.S., and T.F.S. revised and produced  
8 the final version. All authors have read and approved the final version of the manuscript. L.O.D.  
9 takes responsibility for the integrity of the work as a whole.

## 11 FUNDING

12 LOD and AESJ were financially supported by Sao Paulo Research Foundation (FAPESP, Process  
13 numbers #2018/23705-3, and #2017/00062-7 respectively) and Conselho Nacional de  
14 Desenvolvimento Científico e Tecnológico (CNPQ # 401333/2016-7).

## 16 DISCLAIMER

17 The study funders have had no role in study design; collection, management, analysis and  
18 interpretation of data; writing of the report; or the decision to submit the report for publication,  
19 and do not own ultimate authority over any of these activities.

## 21 COMPETING INTERESTS

22 All authors have completed a uniform disclosure form and declare no conflicts of interest



## REFERENCES

1. Hunter DJ, Bierma-Zeinstra S. Osteoarthritis. *Lancet (London, England)*. 2019;393(10182):1745-1759. doi:10.1016/S0140-6736(19)30417-9
2. Vos T, Flaxman AD, Naghavi M, et al. Years lived with disability (YLDs) for 1160 sequelae of 289 diseases and injuries 1990–2010: a systematic analysis for the Global Burden of Disease Study 2010. *Lancet*. 2012;380(9859):2163-2196. doi:10.1016/S0140-6736(12)61729-2
3. Mandl LA. Osteoarthritis year in review 2018: clinical. *Osteoarthr Cartil*. 2018;(xxxx):1-6. doi:10.1016/j.joca.2018.11.001
4. Collins NJ, Hart HF, Mills KAG. OARSI year in review 2018: rehabilitation and outcomes. *Osteoarthr Cartil*. 2018;0(0). doi:10.1016/j.joca.2018.11.010
5. Vowles KE, Mcentee ML, Siyahhan P, Frohe T, Ney JP, Goes DN Van Der. Rates of opioid misuse, abuse, and addiction in chronic pain: a systematic review and data synthesis. *Pain*. 2015;156(4). <http://www.nejm.org/doi/10.1056/NEJMra1507771>.
6. Volkow ND, McLellan AT. Opioid Abuse in Chronic Pain — Misconceptions and Mitigation Strategies. *N Engl J Med*. 2016;374(13):1253-1263. doi:10.1056/NEJMra1507771
7. Deveza LA, Hunter DJ, Van Spil WE. Too much opioid, too much harm. *Osteoarthr Cartil*. 2018;26(3):293-295. doi:10.1016/j.joca.2017.12.003
8. Fransen M, McConnell S, Ar H, M VDE, Simic M, Kl B. Exercise for osteoarthritis of the knee. *Cochrane Libr*. 2015;(1):1-144. doi:10.1002/14651858.CD004376.pub3.[www.cochranelibrary.com](http://www.cochranelibrary.com)
9. Lee AC, Harvey WF, Price LL, et al. Dose-Response Effects of Tai Chi and Physical Therapy Exercise Interventions in Symptomatic Knee Osteoarthritis. *PM&R*. 2018;10(7):712-723. doi:10.1016/j.pmrj.2018.01.003
10. Nicolson PJAA, Bennell KL, Dobson FL, Van Ginckel A, Holden MA, Hinman RS. Interventions to increase adherence to therapeutic exercise in older adults with low back pain and/or hip/knee osteoarthritis: a systematic review and meta-analysis. *Br J Sports Med*. 2017;51(10):791-799. doi:10.1136/bjsports-2016-096458
11. Dobson F, Bennell KL, French SD, et al. Barriers and Facilitators to Exercise Participation in People with Hip and/or Knee Osteoarthritis. *Am J Phys Med Rehabil*.

- 2016;95(5):1. doi:10.1097/phm.0000000000000448
12. Oo WM, Thae Bo M. Efficacy of Physical Modalities in Knee Osteoarthritis: Recent Recommendations. *Int J Phys Med Rehabil*. 2016;04(03):3-4. doi:10.4172/2329-9096.1000e112
  13. Demoulin C, Vanderthommen M. Cryotherapy in rheumatic diseases. *Jt Bone Spine*. 2012;79(2):117-118. doi:10.1016/j.jbspin.2011.09.016
  14. Guillot X, Tordi N, Mourot L, et al. Cryotherapy in inflammatory rheumatic diseases: A systematic review. *Expert Rev Clin Immunol*. 2014;10(2):281-294. doi:10.1586/1744666X.2014.870036
  15. Bleakley CM, Davison GW. Cryotherapy and inflammation: evidence beyond the cardinal signs. *Phys Ther Rev*. 2010;15(6):430-435. doi:10.1179/1743288X10Y.0000000014
  16. Dantas LO, Moreira R de FC, Norde FM, Mendes Silva Serrao PR, Albuquerque-Sendin F, Salvini TF. The effects of cryotherapy on pain and function in individuals with knee osteoarthritis: a systematic review of randomized controlled trials. *Clin Rehabil*. April 2019:026921551984040. doi:10.1177/0269215519840406
  17. Porcheret M, Jordan K, Jinks C. Primary care treatment of knee pain - A survey in older adults. *Rheumatology*. 2007;46(11):1694-1700. doi:10.1093/rheumatology/kem232
  18. Denegar CR, Dougherty DR, Friedman JE, et al. Preferences for heat, cold, or contrast in patients with knee osteoarthritis affect treatment response. *Clin Interv Aging*. 2010;5:199-206. doi:10.2147/CIA.S11431
  19. Chae KJ, Choi MJ, Kim KY, Ajayi FF, Chang IS, Kim IS. National Institute for Health and Care Excellence. Osteoarthritis: Care and Management. December 2014.
  20. Hochberg MC, Altman RD, April KT, et al. American College of Rheumatology 2012 recommendations for the use of nonpharmacologic and pharmacologic therapies in osteoarthritis of the hand, hip, and knee. *Arthritis Care Res*. 2012;64(4):465-474. doi:10.1002/acr.21596
  21. McAlindon TE, Bannuru RR, Sullivan MC, et al. OARSI guidelines for the non-surgical management of knee osteoarthritis. *Osteoarthr Cartil*. 2014;22(3):363-388. doi:10.1016/j.joca.2014.01.003
  22. Fernandes L, Hagen KB, Bijlsma JWJJ, et al. EULAR recommendations for the non-pharmacological core management of hip and knee osteoarthritis. *Ann Rheum Dis*.

- 2013;72(7):1125-1135. doi:10.1136/annrheumdis-2012-202745
23. Brosseau L, Taki J, Desjardins B, et al. The Ottawa panel clinical practice guidelines for the management of knee osteoarthritis. Part two: strengthening exercise programs. *Clin Rehabil.* 2017;31(5):596-611. doi:10.1177/0269215517691084
  24. Brosseau L, Yonge K a, Robinson V, et al. Thermotherapy for treatment of osteoarthritis. *Cochrane Database Syst Rev.* 2003;(4):CD004522. doi:10.1016/S0031-9406(05)60490-7
  25. Chan A-W, Tetzlaff JM, Altman DG, et al. SPIRIT 2013 Statement: Defining Standard Protocol Items for Clinical Trials. *Ann Intern Med.* 2013;158(3):200. doi:10.7326/0003-4819-158-3-201302050-00583
  26. McAlindon TE, Driban JB, Henrotin Y, et al. OARSI Clinical Trials Recommendations: Design, conduct, and reporting of clinical trials for knee osteoarthritis. *Osteoarthr Cartil.* 2015;23(5):747-760. doi:10.1016/j.joca.2015.03.005
  27. Hoffmann TC, Glasziou PP, Boutron I, et al. Better reporting of interventions: template for intervention description and replication (TIDieR) checklist and guide. *BMJ.* 2014;348(mar07\_3):g1687. doi:10.1136/bmj.g1687
  28. Barbour V, Bhui K, Chescheir N, et al. CONSORT Statement for randomized Trials of nonpharmacologic treatments: A 2017 update and a CONSORT extension for nonpharmacologic Trial Abstracts. *Ann Intern Med.* 2017;167(1):40-47. doi:10.7326/M17-0046
  29. Altman R, Asch E, Bloch D, et al. Development of criteria for the classification and reporting of osteoarthritis. Classification of osteoarthritis of the knee. Diagnostic and Therapeutic Criteria Committee of the American Rheumatism Association. *Arthritis Rheum.* 1986;29(8):1039-1049. doi:10.1002/art.1780290816
  30. Dunlop DD, Song J, Lee J, et al. Physical Activity Minimum Threshold Predicting Improved Function in Adults With Lower-Extremity Symptoms. *Arthritis Care Res.* 2017;69(4):475-483. doi:10.1002/acr.23181
  31. Dantas LO, Breda CC, da Silva Serrao PRM, et al. Short-term cryotherapy did not substantially reduce pain and had unclear effects on physical function and quality of life in people with knee osteoarthritis: a randomised trial. *J Physiother.* 2019;65(4):215-221. doi:10.1016/j.jphys.2019.08.004
  32. Messier SP, Mihalko SL, Beavers DP, et al. Strength training for arthritis trial (START):

- 1  
2  
3 Design and rationale. *BMC Musculoskelet Disord*. 2013;14(1):1. doi:10.1186/1471-2474-  
4 14-208  
5  
6  
7 33. Fransen M, McConnell S, Harmer AR, Van Der Esch M, Simic M, Bennell KL. Exercise  
8 for osteoarthritis of the knee: A Cochrane systematic review. *Br J Sports Med*.  
9 2015;49(24):1554-1557. doi:10.1136/bjsports-2015-095424  
10  
11  
12 34. Nóbrega SR, Ugrinowitsch C, Pintanel L, Barcelos C, Libardi CA. Effect of Resistance  
13 Training to Muscle Failure vs. Volitional Interruption at High- and Low-Intensities on  
14 Muscle Mass and Strength. *J Strength Cond Res*. 2018;32(1):162-169.  
15 doi:10.1519/JSC.0000000000001787  
16  
17  
18 35. Bennell KL, Dobson F, Hinman RS. Exercise in osteoarthritis: Moving from prescription  
19 to adherence. *Best Pract Res Clin Rheumatol*. 2014;28(1):93-117.  
20 doi:10.1016/j.berh.2014.01.009  
21  
22  
23 36. American Geriatrics Society Panel on Exercise and Osteoarthritis. Exercise prescription  
24 for older adults with osteoarthritis pain: consensus practice recommendations. A  
25 supplement to the AGS Clinical Practice Guidelines on the management of chronic pain in  
26 older adults. *Jags*. 2001;49(6):808-823. doi:10.1046/j.1532-5415.2001.00496.x  
27  
28  
29 37. Vincent KR, Vincent HK. Resistance exercise for knee osteoarthritis. *PM R*. 2012;4(5  
30 Suppl):S45-52. doi:10.1016/j.pmrj.2012.01.019  
31  
32  
33 38. Silva P, Lott R, Wickrama S, Mota J, Welk G. Elastic Bandaging for Orthopedic and  
34 Sports Injuries Prevention and Rehabilitation: A Systematic Review. *Int J Sport Nutr*  
35 *Exerc Metab*. 2016;32:1-44. doi:10.1123/ijssp.2015-0012  
36  
37  
38 39. Song M, Sun X, Tian X, et al. Compressive cryotherapy versus cryotherapy alone in  
39 patients undergoing knee surgery: a meta-analysis. *Springerplus*. 2016;5(1):1-12.  
40 doi:10.1186/s40064-016-2690-7  
41  
42  
43 40. Hawker GA, Mian S, Kendzerska T, French M. Measures of adult pain: Visual Analog  
44 Scale for Pain (VAS Pain), Numeric Rating Scale for Pain (NRS Pain), McGill Pain  
45 Questionnaire (MPQ), Short-Form McGill Pain Questionnaire (SF-MPQ), Chronic Pain  
46 Grade Scale (CPGS), Short Form-36 Bodily Pain Scale (SF. *Arthritis Care Res*  
47 *(Hoboken)*. 2011;63(S11):S240-S252. doi:10.1002/acr.20543  
48  
49  
50 41. MI F. Tradução e validação do questionário de qualidade de vida específico para  
51 osteoartrose WOMAC (Western Ontario McMaster Universities) para a língua portuguesa.  
52  
53  
54  
55  
56  
57  
58  
59  
60

- 2003.
42. Ciconelli RM, Ferraz MB, Santos W, Meinao I, Quaresma MR. Brazilian-Portuguese version of the SF-36. A reliable and valid quality of life outcome measure. *Rev Bras Reumatol*. 1999;39(3):143-150.
  43. Dobson F, Bennell KL, Hinman RS, Abbott JH, Roos EM. Recommended performance - based tests to assess physical function in people diagnosed with hip or knee osteoarthritis. *OARSI - Osteoarthr Res Soc Int*. 2013;1-26. doi:10.1016/j.joca.2013.05.002
  44. Kolasinski SL, Neogi T, Hochberg MC, et al. 2019 American College of Rheumatology/Arthritis Foundation Guideline for the Management of Osteoarthritis of the Hand, Hip, and Knee. *Arthritis Rheumatol*. 2020;0(November):art.41142. doi:10.1002/art.41142
  45. Bannuru RR, Osani MC, Vaysbrot EE, et al. OARSI guidelines for the non-surgical management of knee, hip, and polyarticular osteoarthritis. *Osteoarthr Cartil*. 2019;27(11):1578-1589. doi:10.1016/j.joca.2019.06.011
  46. Pham T, van der Heijde D, Altman R., et al. OMERACT-OARSI Initiative: Osteoarthritis Research Society International set of responder criteria for osteoarthritis clinical trials revisited. *Osteoarthr Cartil*. 2004;12(5):389-399. doi:10.1016/j.joca.2004.02.001
  47. Bennell K, Dobson F, Hinman R. Measures of physical performance assessments: Self-Paced Walk Test (SPWT), Stair Climb Test (SCT), Six-Minute Walk Test (6MWT), Chair Stand Test (CST), Timed Up & Go (TUG), Sock Test, Lift and Carry Test (LCT), and Car Task. *Arthritis Care Res (Hoboken)*. 2011;63(S11):S350-S370. doi:10.1002/acr.20538
  48. Bellamy N, Crette S, Ford P, et al. Osteoarthritis Antirheumatic Drug Trials. III. Setting the Delta for Clinical Trials--Results of a Consensus Development (Delphi) Exercise. *J Rheumatol* 19 (3),. 1992;3:451-457.
  49. Fitzgerald GK, Fritz JM, Childs JD, et al. Exercise, manual therapy, and use of booster sessions in physical therapy for knee osteoarthritis: a multi-center, factorial randomized clinical trial. *Osteoarthr Cartil*. 2016;24(8):1340-1349. doi:10.1016/j.joca.2016.03.001
  50. Cohen J. *Statistical Power Analysis for the Behavioral Sciences*. 2nd Editio. (Hillsdale NJ. LE, ed.); 1998.
  51. Angst F, Aeschlimann A, Stucki G. Smallest detectable and minimal clinically important

- 1  
2  
3 differences of rehabilitation intervention with their implications for required sample sizes  
4 using WOMAC and SF-36 quality of life measurement instruments in patients with  
5 osteoarthritis of the lower ex. *Arthritis Rheum.* 2001;45(4):384-391. doi:10.1002/1529-  
6 0131(200108)45:4<384::AID-ART352>3.0.CO;2-0  
7  
8  
9  
10 52. Escobar A, Quintana JM, Bilbao A, Aróstegui I, Lafuente I, Vidaurreta I. Responsiveness  
11 and clinically important differences for the WOMAC and SF-36 after total knee  
12 replacement. *Osteoarthr Cartil.* 2007;15(3):273-280. doi:10.1016/j.joca.2006.09.001  
13  
14  
15 53. Dobson F, Hinman RS, Roos EM, et al. OARSI recommended performance-based tests to  
16 assess physical function in people diagnosed with hip or knee osteoarthritis. *Osteoarthr*  
17 *Cartil.* 2013;21(8):1042-1052. doi:10.1016/j.joca.2013.05.002  
18  
19  
20  
21  
22  
23  
24  
25  
26  
27  
28  
29  
30  
31  
32  
33  
34  
35  
36  
37  
38  
39  
40  
41  
42  
43  
44  
45  
46  
47  
48  
49  
50  
51  
52  
53  
54  
55  
56  
57  
58  
59  
60

1  
2  
3 **Figure 1**  
4

5 **Legend:** Land Based Exercise Protocol Characteristics  
6  
7  
8  
9  
10  
11  
12  
13  
14  
15  
16  
17  
18  
19  
20  
21  
22  
23  
24  
25  
26  
27  
28  
29  
30  
31  
32  
33  
34  
35  
36  
37  
38  
39  
40  
41  
42  
43  
44  
45  
46  
47  
48  
49  
50  
51  
52  
53  
54  
55  
56  
57  
58  
59  
60

For peer review only



**Table 1.** Timeline of the measurements to be taken at each point on the trials

| TIMELINE             |                                  | Enrolment                | STE protocol training | Baseline assessment (A1) | Intervention | Post-intervention assessment (A2) | Follow-up assessment (A3) | Follow-up assessment (A4) |
|----------------------|----------------------------------|--------------------------|-----------------------|--------------------------|--------------|-----------------------------------|---------------------------|---------------------------|
|                      |                                  | -2 weeks (-14 to -7 day) | -1 week (-7 to 0 day) | Day 0                    |              | 8 weeks (±3 days)                 | 20 weeks (±3 days)        | 32 weeks (±3 days)        |
| <b>Enrolment</b>     | Eligibility screen               | X                        |                       |                          |              |                                   |                           |                           |
|                      | Informed consent                 | X                        |                       |                          |              |                                   |                           |                           |
| <b>Interventions</b> | Allocation                       |                          |                       | X                        |              |                                   |                           |                           |
|                      | STE                              |                          |                       |                          | X            |                                   |                           |                           |
|                      | STE + cryotherapy                |                          |                       |                          | X            |                                   |                           |                           |
|                      | STE + sham cryotherapy           |                          |                       |                          | X            |                                   |                           |                           |
|                      | X-ray examination of both knees  | X                        |                       |                          |              |                                   |                           |                           |
| <b>Assessments</b>   | VAS                              |                          |                       | X                        |              | X                                 | X                         | X                         |
|                      | WOMAC                            |                          |                       | X                        |              | X                                 | X                         | X                         |
|                      | SF-36                            |                          |                       | X                        |              | X                                 | X                         | X                         |
|                      | Timed-up and Go Test             |                          |                       | X                        |              | X                                 | X                         | X                         |
|                      | 30-Second Chair to Stand Test    |                          |                       | X                        |              | X                                 | X                         | X                         |
|                      | Stair Climb Test                 |                          |                       | X                        |              | X                                 | X                         | X                         |
|                      | 40m (4x10m) Fast Paced Walk Test |                          |                       | X                        |              | X                                 | X                         | X                         |

STE: Strength Therapeutic Exercises; VAS: Visual Analogue Scale, WOMAC: Western Ontario & McMaster Universities Osteoarthritis questionnaire; KOOS: Knee Injury and Osteoarthritis Outcome Score; SF-36: Short Form-36 questionnaire.

A: Assessment

**Table 2.** Description of the outcome measures.

| Outcome measure                                                                 | Description of the test                                                                                                                                                                                                                                                                                                                                                                                                          | Scoring                                                                                                                                                                                                                                                                                                       | Minimum clinically important difference                                                                   |
|---------------------------------------------------------------------------------|----------------------------------------------------------------------------------------------------------------------------------------------------------------------------------------------------------------------------------------------------------------------------------------------------------------------------------------------------------------------------------------------------------------------------------|---------------------------------------------------------------------------------------------------------------------------------------------------------------------------------------------------------------------------------------------------------------------------------------------------------------|-----------------------------------------------------------------------------------------------------------|
| <b>Visual analogue scale</b>                                                    | The scale is positioned in front of the patient who is asked to evaluate pain intensity in the prior week. <sup>40</sup>                                                                                                                                                                                                                                                                                                         | The scale ranges from 0 (no pain) to 10 cm (maximum pain intensity).                                                                                                                                                                                                                                          | A pain reduction of 1.75 cm is recommended in OA research. <sup>48</sup>                                  |
| <b>Western Ontario &amp; McMaster Universities Osteoarthritis questionnaire</b> | This self-report questionnaire evaluates the difficulties experienced by individuals with lower limb OA in the prior 72 hours. It contains 24 questions in 3 domains: pain, stiffness, and physical function.                                                                                                                                                                                                                    | Each question is scored from 0 to 4, and the maximum score possible is 96. The higher the scores, the worse the status of a patient.                                                                                                                                                                          | An improvement of 12% from baseline is recommended in OA research. <sup>51</sup>                          |
| <b>Short Form-36 questionnaire (SF-36)</b>                                      | The short form questionnaire is intended to measure the patient's quality of life with 36 items referring to the past four weeks. It presents a multiple-choice scale that evaluates eight domains of life: Physical Functioning, Role Limitations due to Physical Problems, General Health Perceptions, Vitality, Social Functioning, Role Limitations due to Emotional Problems, General Mental Health and Health Transition.  | The sum of the total value varies from 0 to 100, with higher indexes indicating a better quality of life. Each of the eight summed scores was linearly transformed into a scale from 0 (negative health) to 100 (positive health) to provide a score for each subscale. Each subscale was used independently. | A difference of 10 points is recommended as an MCID in OA research. <sup>52</sup>                         |
| <b>Stair Climb Test</b>                                                         | The participant is positioned in front of the stairs. At the therapist's signal, he/she has to climb the indicated steps (we used the 12-step SCT) and descend promptly, being able to use the handrail as a security instrument. We used 20 cm steps height, a handrail stair in a lighted environment, free of traffic, or external distractions. Moreover, a pre-test was conducted to identify the need for safety measures. | The final score is calculated based on the time the participant took to perform the test and compared it to the literature normative values of the test.                                                                                                                                                      | A reduction of 5.5 seconds in the test is the recommended MCID in OA research <sup>43</sup>               |
| <b>40m (4x10m) Fast Paced Walk Test</b>                                         | Administered at a distance of 10 meters (marked by tapes), a cone is placed 2 meters before the start and 2 meters after the end of each marking. The participant is instructed to walk as quickly but as safely as possible the first 10 meters (from the start mark), to turn around in the cone and walk back the 10 meters again, successively until completing the distance of 40 meters.                                   | Speed (m/s)                                                                                                                                                                                                                                                                                                   | An increase of 0.2-0.3 meters per second in the test is the recommended MCID in OA research <sup>43</sup> |
| <b>30-Second Chair to Stand Test</b>                                            | A chair with no arms is placed against a wall to prevent oscillations. Patients sit in the middle of the chair, with their back straight and feet resting on the floor in line with their shoulders. The participant is asked to rise from sitting to standing as many times as possible in 30 seconds.                                                                                                                          | Total number of repetitions within 30 seconds                                                                                                                                                                                                                                                                 | An increase of 2 to 3 repetitions is recommended in OA research. <sup>53</sup>                            |

OA: Osteoarthritis



# SUPPLEMENTARY FILE

## Land-Based Exercises Protocol for Patients with Knee Osteoarthritis

### Warm-up Phase (10 min)



**Description: treadmill, stationary bicycle, or walking.**

Performed in a comfortable cardiorespiratory intensity aiming the joints mobility.

### Cool-down Phase (10 min)



**Description: Quadriceps stretching.**

Active stretching performed with maximum tolerable range of motion.

**Set: 1 x 30 seconds**



**Description: Gastrocnemius stretching.**

Active stretching performed with maximum tolerable range of motion.

**Set: 1 x 30 seconds**



**Description: Hamstrings stretching.**

Active stretching performed with maximum tolerable range of motion.

**Set: 1 x 30 seconds**

# SUPPLEMENTARY FILE

## Conditioning PHASE 1

**A**



**B**



**Name: Bridge**

**Type: isometric**

**Position A:** lie down on the mat, knees pointing to the ceiling, knees aligned with hips.

**Position B:** raise your hips up toward the ceiling and hold for 15 up to 30 s.

**Sets:** 3 x 15-30 seconds



**Name: Straight Leg Raise (SLR) – hip flexion**

**Type: Isotonic**

**Position A:** lie down, one leg bent and another straight, pull up your foot.

**Position B:** raise your leg straight up until it is aligned with the other thigh, then slowly lower it down.

**Sets:** 3

**Repetitions:** 12



**Name: SLR – hip abduction**

**Type: Isotonic**

**Position A:** side lying position, bend the knee in contact with the floor and straight the other leg.

**Position B:** raise your leg straight up, kneecap pointing forward, pulling up your foot.

**Sets:** 3

**Repetitions:** 12



**Name: SLR – hip adduction**

**Type: Isotonic**

**Position A:** side lying position, leg in contact with the floor straight and the other leg bent.

**Position B:** raise your leg straight up, kneecap pointing forward, pulling up your foot.

**Sets:** 3

**Repetitions:** 12



**Name: SLR – hip extension**

**Type: Isotonic**

**Position A:** prone position, both legs straight touching the floor.

**Position B:** raise one leg up at a time, keeping the totally knee straight.

**Sets:** 3

**Repetitions:** 12



# SUPPLEMENTARY FILE

A



B



**Name: Abdominal curls (crunches)**

**Type: Isotonic**

**Position A:** lie down on the mat, place your hands behind your head, bend your knees and keep them aligned with hips.

**Position B:** as you exhale, slowly lift your chest up; as you inhale, slowly lower your chest down. Avoid bringing your chin to your chest.

**Sets: 3**

**Repetitions: 12**



**Name: Standing calf raises**

**Type: Isotonic**

**Position A:** Standing on both legs, hands on the wall for balance (if needed).

**Position B:** rise up on toes then slowly lower down.

**Sets: 3**

**Repetitions: 12**

## Conditioning PHASE 2

A



B



**Name: Plank**

**Type: Isometric**

**Position A:** lying on your belly (prone position).

**Position B:** lift your entire body up with elbow and feet supports. Hold for 15 up to 30 seconds.

**Sets: 3 x 15-30 seconds**



**Name: Bridge with one leg**

**Type: Isometric**

**Position A:** lie down on the mat, knees pointing to the ceiling, knees aligned with hips.

**Position B:** raise your hips up toward the ceiling then carefully take one leg off the floor. Hold for 15 up to 30 s.

**Sets: 3 x 15-30 seconds**

# SUPPLEMENTARY FILE

A



B

**Name: Clam shell****Type: Isotonic****Position A:** side lying position, elastic band around your thighs, knees bent.**Position B:** move your knee away, squeezing your buttocks then slowly return. Repeat with the other side/leg.**Sets: 3****Repetitions: 12**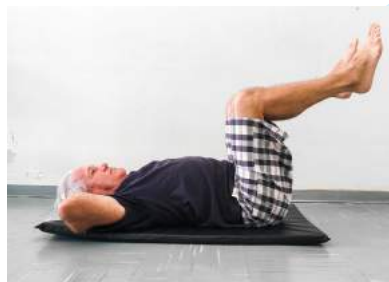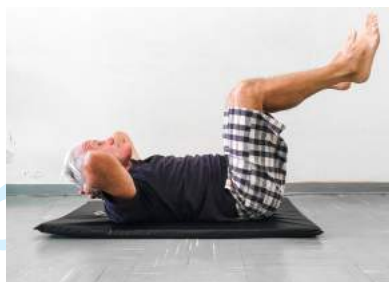**Name: Abdominal curls with lifted legs****Type: Isotonic****Position A:** lie down on the mat, place your hands behind your head, bend your knees and keep them aligned with hips. Lift both legs up.**Position B:** as you exhale, slowly lift your chest up; as you inhale, slowly lower your chest down. Avoid bringing your chin to your chest.**Sets: 3****Repetitions: 12**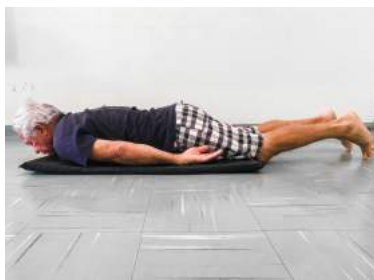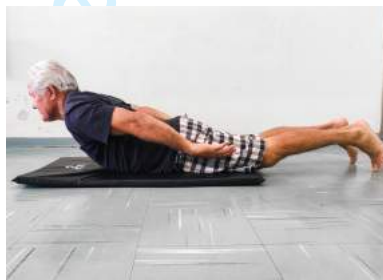**Name: Trunk extension****Type: Isometric****Position A:** lying on your belly (prone position).**Position B:** move your chest away from the floor. Look at the ground. Hold for 30 seconds at least.**Repetitions: 3 x 30 seconds****Name: Wall squat****Type: Isometric contraction****Position A:** stand with your trunk to a wall, feet aligned with knees and hips, and away from the wall.**Position B:** slide down and keep your trunk towards the wall. Hold for 30 seconds up to one minute.**Repetitions: 3****Name: Partial squat****Type: isotonic contraction****Position A:** standing on both legs.**Position B:** slowly bend your knees and stand up again. Maintain your knees over your feet.**Repetitions: 3**

# SUPPLEMENTARY FILE

A



B



**Name:** Standing hip abduction.

**Type:** static balance

**Position A:** standing on both legs with an elastic band around both legs.

**Position B:** lift one leg out, maintain the kneecap pointing forward, and hold for 30 seconds or more.

**Repetitions:** 3 (each leg)

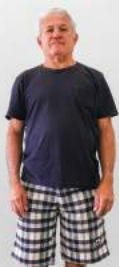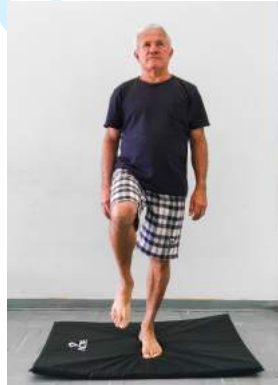

**Name:** Standing on one leg

**Type:** static balance on stable surface

**Position A:** standing on both legs, eyes opened.

**Position B:** standing on one leg, knee slightly bent, lift the other leg off the floor and maintain the position up to 1 minute.

**Repetitions:** 2 (each leg)

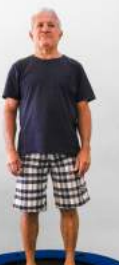

**Name:** Standing on one leg

**Type:** static balance on unstable surface (trampoline, foam etc)

**Position A:** standing on both legs, eyes opened.

**Position B:** standing on one leg, remove another leg from ground and maintain the position.

**Repetitions:** 2 (each leg)

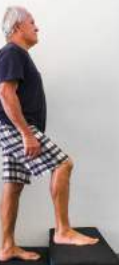

**Name:** Step-up

**Type:** isotonic contraction

**Position A:** on leg onto a step.

**Position B:** step up onto the next step, use the wall for balance if needed. Step back down carefully to the position A.

**Sets:** 2 (each leg)

**Repetitions:** 12



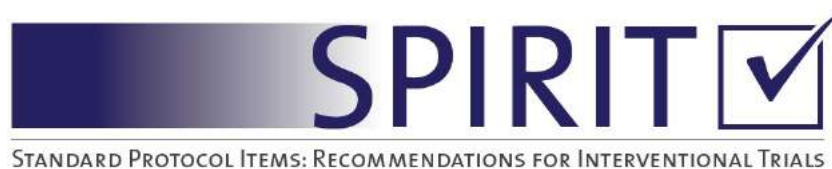

SPIRIT 2013 Checklist: Recommended items to address in a clinical trial protocol and related documents\*

| Section/item                      | Item No | Description                                                                                                                                                                                                                                                                                           |
|-----------------------------------|---------|-------------------------------------------------------------------------------------------------------------------------------------------------------------------------------------------------------------------------------------------------------------------------------------------------------|
| <b>Administrative information</b> |         |                                                                                                                                                                                                                                                                                                       |
| Title                             | 1       | Descriptive title identifying the study design, population, interventions, and, if applicable, trial acronym - <b>PAGE 01</b>                                                                                                                                                                         |
| Trial registration                | 2a      | Trial identifier and registry name. If not yet registered, name of intended registry - <b>PAGE 02</b>                                                                                                                                                                                                 |
|                                   | 2b      | All items from the World Health Organization Trial Registration Data Set - <b>N/A</b>                                                                                                                                                                                                                 |
| Protocol version                  | 3       | Date and version identifier - <b>N/A</b>                                                                                                                                                                                                                                                              |
| Funding                           | 4       | Sources and types of financial, material, and other support - <b>PAGE 14</b>                                                                                                                                                                                                                          |
| Roles and responsibilities        | 5a      | Names, affiliations, and roles of protocol contributors - <b>PAGE 01</b>                                                                                                                                                                                                                              |
|                                   | 5b      | Name and contact information for the trial sponsor - <b>N/A</b>                                                                                                                                                                                                                                       |
|                                   | 5c      | Role of study sponsor and funders, if any, in study design; collection, management, analysis, and interpretation of data; writing of the report; and the decision to submit the report for publication, including whether they will have ultimate authority over any of these activities - <b>N/A</b> |
|                                   | 5d      | Composition, roles, and responsibilities of the coordinating centre, steering committee, endpoint adjudication committee, data management team, and other individuals or groups overseeing the trial, if applicable (see Item 21a for data monitoring committee) - <b>N/A</b>                         |
| <b>Introduction</b>               |         |                                                                                                                                                                                                                                                                                                       |
| Background and rationale          | 6a      | Description of research question and justification for undertaking the trial, including summary of relevant studies (published and unpublished) examining benefits and harms for each intervention - <b>PAGES 4-5</b>                                                                                 |
|                                   | 6b      | Explanation for choice of comparators - <b>PAGES 4-5</b>                                                                                                                                                                                                                                              |
| Objectives                        | 7       | Specific objectives or hypotheses - <b>PAGES 4-5</b>                                                                                                                                                                                                                                                  |

1  
2  
3  
4  
5  
6  
7  
8  
9  
10  
11  
12  
13  
14  
15  
16  
17  
18  
19  
20  
21  
22  
23  
24  
25  
26  
27  
28  
29  
30  
31  
32  
33  
34  
35  
36  
37  
38  
39  
40  
41  
42  
43  
44  
45  
46  
47  
48  
49  
50  
51  
52  
53  
54  
55  
56  
57  
58  
59  
60

Trial design 8 Description of trial design including type of trial (eg, parallel group, crossover, factorial, single group), allocation ratio, and framework (eg, superiority, equivalence, noninferiority, exploratory) – PAGE 6

### Methods: Participants, interventions, and outcomes

Study setting 9 Description of study settings (eg, community clinic, academic hospital) and list of countries where data will be collected. Reference to where list of study sites can be obtained – PAGE 6

Eligibility criteria 10 Inclusion and exclusion criteria for participants. If applicable, eligibility criteria for study centres and individuals who will perform the interventions (eg, surgeons, psychotherapists) – PAGE 7

Interventions 11a Interventions for each group with sufficient detail to allow replication, including how and when they will be administered – PAGES 8-10

11b Criteria for discontinuing or modifying allocated interventions for a given trial participant (eg, drug dose change in response to harms, participant request, or improving/worsening disease) – PAGES 8-10

11c Strategies to improve adherence to intervention protocols, and any procedures for monitoring adherence (eg, drug tablet return, laboratory tests) – PAGES 8-10

11d Relevant concomitant care and interventions that are permitted or prohibited during the trial – PAGES 8-10

Outcomes 12 Primary, secondary, and other outcomes, including the specific measurement variable (eg, systolic blood pressure), analysis metric (eg, change from baseline, final value, time to event), method of aggregation (eg, median, proportion), and time point for each outcome. Explanation of the clinical relevance of chosen efficacy and harm outcomes is strongly recommended – PAGES 10-11

Participant timeline 13 Time schedule of enrolment, interventions (including any run-ins and washouts), assessments, and visits for participants. A schematic diagram is highly recommended (see Figure) – PAGE 22

Sample size 14 Estimated number of participants needed to achieve study objectives and how it was determined, including clinical and statistical assumptions supporting any sample size calculations – PAGE 12

Recruitment 15 Strategies for achieving adequate participant enrolment to reach target sample size – PAGE 7

### Methods: Assignment of interventions (for controlled trials)

Allocation:

|    |                                                           |     |                                                                            |
|----|-----------------------------------------------------------|-----|----------------------------------------------------------------------------|
| 1  |                                                           |     |                                                                            |
| 2  | Sequence                                                  | 16a | Method of generating the allocation sequence (eg, computer-                |
| 3  | generation                                                |     | generated random numbers), and list of any factors for stratification.     |
| 4  |                                                           |     | To reduce predictability of a random sequence, details of any planned      |
| 5  |                                                           |     | restriction (eg, blocking) should be provided in a separate document       |
| 6  |                                                           |     | that is unavailable to those who enrol participants or assign              |
| 7  |                                                           |     | interventions <b>- PAGE 12</b>                                             |
| 8  |                                                           |     |                                                                            |
| 9  |                                                           |     |                                                                            |
| 10 | Allocation                                                | 16b | Mechanism of implementing the allocation sequence (eg, central             |
| 11 | concealment                                               |     | telephone; sequentially numbered, opaque, sealed envelopes),               |
| 12 | mechanism                                                 |     | describing any steps to conceal the sequence until interventions are       |
| 13 |                                                           |     | assigned <b>- PAGE 12</b>                                                  |
| 14 |                                                           |     |                                                                            |
| 15 | Implementation                                            | 16c | Who will generate the allocation sequence, who will enrol participants,    |
| 16 |                                                           |     | and who will assign participants to interventions <b>- PAGE 12</b>         |
| 17 |                                                           |     |                                                                            |
| 18 |                                                           |     |                                                                            |
| 19 | Blinding                                                  | 17a | Who will be blinded after assignment to interventions (eg, trial           |
| 20 | (masking)                                                 |     | participants, care providers, outcome assessors, data analysts), and       |
| 21 |                                                           |     | how <b>- PAGES 8, 10</b>                                                   |
| 22 |                                                           |     |                                                                            |
| 23 |                                                           | 17b | If blinded, circumstances under which unblinding is permissible, and       |
| 24 |                                                           |     | procedure for revealing a participant's allocated intervention during      |
| 25 |                                                           |     | the trial <b>- N/A</b>                                                     |
| 26 |                                                           |     |                                                                            |
| 27 |                                                           |     |                                                                            |
| 28 | <b>Methods: Data collection, management, and analysis</b> |     |                                                                            |
| 29 |                                                           |     |                                                                            |
| 30 | Data collection                                           | 18a | Plans for assessment and collection of outcome, baseline, and other        |
| 31 | methods                                                   |     | trial data, including any related processes to promote data quality (eg,   |
| 32 |                                                           |     | duplicate measurements, training of assessors) and a description of        |
| 33 |                                                           |     | study instruments (eg, questionnaires, laboratory tests) along with        |
| 34 |                                                           |     | their reliability and validity, if known. Reference to where data          |
| 35 |                                                           |     | collection forms can be found, if not in the protocol <b>- PAGES 12-13</b> |
| 36 |                                                           |     |                                                                            |
| 37 |                                                           |     |                                                                            |
| 38 |                                                           | 18b | Plans to promote participant retention and complete follow-up,             |
| 39 |                                                           |     | including list of any outcome data to be collected for participants who    |
| 40 |                                                           |     | discontinue or deviate from intervention protocols <b>- PAGES 12-13</b>    |
| 41 |                                                           |     |                                                                            |
| 42 | Data                                                      | 19  | Plans for data entry, coding, security, and storage, including any         |
| 43 | management                                                |     | related processes to promote data quality (eg, double data entry;          |
| 44 |                                                           |     | range checks for data values). Reference to where details of data          |
| 45 |                                                           |     | management procedures can be found, if not in the protocol <b>- PAGE</b>   |
| 46 |                                                           |     | <b>12-13</b>                                                               |
| 47 |                                                           |     |                                                                            |
| 48 |                                                           |     |                                                                            |
| 49 | Statistical                                               | 20a | Statistical methods for analysing primary and secondary outcomes.          |
| 50 | methods                                                   |     | Reference to where other details of the statistical analysis plan can be   |
| 51 |                                                           |     | found, if not in the protocol <b>- PAGES 12-13</b>                         |
| 52 |                                                           |     |                                                                            |
| 53 |                                                           |     |                                                                            |
| 54 |                                                           | 20b | Methods for any additional analyses (eg, subgroup and adjusted             |
| 55 |                                                           |     | analyses) <b>- PAGES 12-13</b>                                             |
| 56 |                                                           |     |                                                                            |
| 57 |                                                           | 20c | Definition of analysis population relating to protocol non-adherence       |
| 58 |                                                           |     | (eg, as randomised analysis), and any statistical methods to handle        |
| 59 |                                                           |     | missing data (eg, multiple imputation) <b>- PAGES 12-13</b>                |
| 60 |                                                           |     |                                                                            |

## Methods: Monitoring

|                 |     |                                                                                                                                                                                                                                                                                                                                                  |
|-----------------|-----|--------------------------------------------------------------------------------------------------------------------------------------------------------------------------------------------------------------------------------------------------------------------------------------------------------------------------------------------------|
| Data monitoring | 21a | Composition of data monitoring committee (DMC); summary of its role and reporting structure; statement of whether it is independent from the sponsor and competing interests; and reference to where further details about its charter can be found, if not in the protocol. Alternatively, an explanation of why a DMC is not needed <b>N/A</b> |
|                 | 21b | Description of any interim analyses and stopping guidelines, including who will have access to these interim results and make the final decision to terminate the trial <b>- N/A</b>                                                                                                                                                             |
| Harms           | 22  | Plans for collecting, assessing, reporting, and managing solicited and spontaneously reported adverse events and other unintended effects of trial interventions or trial conduct <b>- PAGES 6-8</b>                                                                                                                                             |
| Auditing        | 23  | Frequency and procedures for auditing trial conduct, if any, and whether the process will be independent from investigators and the sponsor <b>- N/A</b>                                                                                                                                                                                         |

## Ethics and dissemination

|                               |     |                                                                                                                                                                                                                                                   |
|-------------------------------|-----|---------------------------------------------------------------------------------------------------------------------------------------------------------------------------------------------------------------------------------------------------|
| Research ethics approval      | 24  | Plans for seeking research ethics committee/institutional review board (REC/IRB) approval <b>- PAGES 13, 14</b>                                                                                                                                   |
| Protocol amendments           | 25  | Plans for communicating important protocol modifications (eg, changes to eligibility criteria, outcomes, analyses) to relevant parties (eg, investigators, REC/IRBs, trial participants, trial registries, journals, regulators) <b>- PAGE 13</b> |
| Consent or assent             | 26a | Who will obtain informed consent or assent from potential trial participants or authorised surrogates, and how (see Item 32) <b>- PAGE 13</b>                                                                                                     |
|                               | 26b | Additional consent provisions for collection and use of participant data and biological specimens in ancillary studies, if applicable <b>N/A</b>                                                                                                  |
| Confidentiality               | 27  | How personal information about potential and enrolled participants will be collected, shared, and maintained in order to protect confidentiality before, during, and after the trial <b>- PAGES 06, 07</b>                                        |
| Declaration of interests      | 28  | Financial and other competing interests for principal investigators for the overall trial and each study site <b>- PAGE 14</b>                                                                                                                    |
| Access to data                | 29  | Statement of who will have access to the final trial dataset, and disclosure of contractual agreements that limit such access for investigators <b>N/A</b>                                                                                        |
| Ancillary and post-trial care | 30  | Provisions, if any, for ancillary and post-trial care, and for compensation to those who suffer harm from trial participation <b>N/A</b>                                                                                                          |

- 1  
2  
3  
4  
5  
6  
7  
8  
9  
10  
11  
12  
13  
14  
15
- |                         |     |                                                                                                                                                                                                                                                                                                           |
|-------------------------|-----|-----------------------------------------------------------------------------------------------------------------------------------------------------------------------------------------------------------------------------------------------------------------------------------------------------------|
| Dissemination<br>policy | 31a | Plans for investigators and sponsor to communicate trial results to participants, healthcare professionals, the public, and other relevant groups (eg, via publication, reporting in results databases, or other data sharing arrangements), including any publication restrictions — <b>PAGES 13, 14</b> |
|                         | 31b | Authorship eligibility guidelines and any intended use of professional writers <b>N/A</b>                                                                                                                                                                                                                 |
|                         | 31c | Plans, if any, for granting public access to the full protocol, participant-level dataset, and statistical code — <b>PAGE S13, 14</b>                                                                                                                                                                     |

## 16 Appendices

- 17  
18  
19  
20  
21  
22  
23  
24
- |                               |    |                                                                                                                                                                                                           |
|-------------------------------|----|-----------------------------------------------------------------------------------------------------------------------------------------------------------------------------------------------------------|
| Informed consent<br>materials | 32 | Model consent form and other related documentation given to participants and authorised surrogates <b>N/A</b>                                                                                             |
| Biological<br>specimens       | 33 | Plans for collection, laboratory evaluation, and storage of biological specimens for genetic or molecular analysis in the current trial and for future use in ancillary studies, if applicable <b>N/A</b> |

---

25 \*It is strongly recommended that this checklist be read in conjunction with the SPIRIT 2013  
26 Explanation & Elaboration for important clarification on the items. Amendments to the  
27 protocol should be tracked and dated. The SPIRIT checklist is copyrighted by the SPIRIT  
28 Group under the Creative Commons "[Attribution-NonCommercial-NoDerivs 3.0 Unported](https://creativecommons.org/licenses/by-nc-nd/3.0/)"  
29 license.  
30  
31  
32  
33  
34  
35  
36  
37  
38  
39  
40  
41  
42  
43  
44  
45  
46  
47  
48  
49  
50  
51  
52  
53  
54  
55  
56  
57  
58  
59  
60
