# Supplementary material for: Cryotherapy associated with tailored land-based exercises for knee osteoarthritis: a protocol for a double-blind sham-controlled randomised trial
Source: PubMed Central journal article supplement — BMJ Open. 2020 Jun 1;10(6):e035610. doi: 10.1136/bmjopen-2019-035610 (PMC7265131; doi:10.1136/bmjopen-2019-035610), 2020-06-01
Supplement: bmjopen-2019-035610supp001.pdf [file bmjopen-2019-035610supp001.pdf]

# SUPPLEMENTARY FILE

## Land-Based Exercises Protocol for Patients with Knee Osteoarthritis

### Warm-up (10 min)

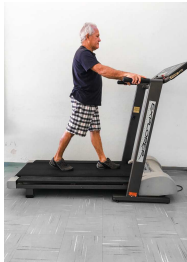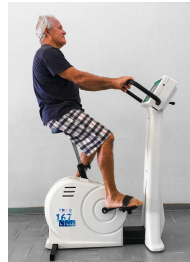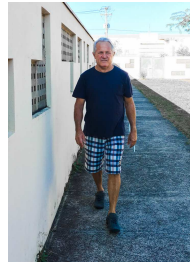

**Description: treadmill, stationary bicycle, or walking.**

Performed in a comfortable cardiorespiratory intensity aiming the joints mobility.

### Cool-down (10 min)

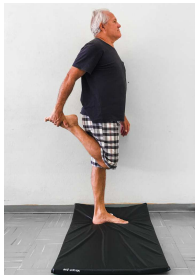

**Description: Quadriceps stretching.**

Active stretching performed with maximum tolerable range of motion.

**Set: 1 x 30 seconds**

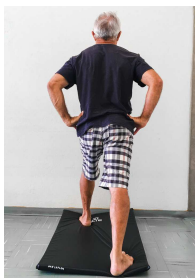

**Description: Gastrocnemius stretching.**

Active stretching performed with maximum tolerable range of motion.

**Set: 1 x 30 seconds**

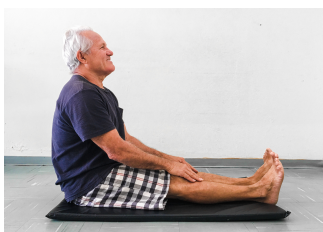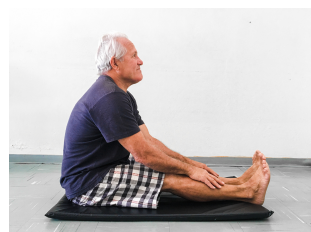

**Description: Hamstrings stretching.**

Active stretching performed with maximum tolerable range of motion.

**Set: 1 x 30 seconds**

# SUPPLEMENTARY FILE

## Exercise Protocol - Phase 1

**A**

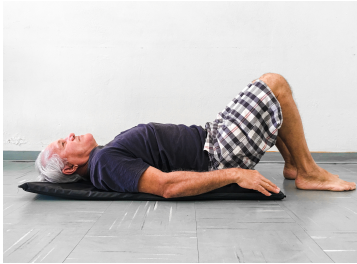

**B**

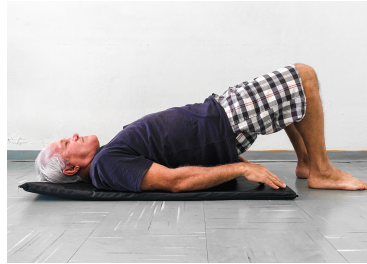

**Name: Bridge**

**Type: isometric**

**Position A:** lie down on the mat, knees pointing to the ceiling, knees aligned with hips.

**Position B:** raise your hips up toward the ceiling and hold for 15 up to 30 s.

**Sets:** 3 x 15-30 seconds

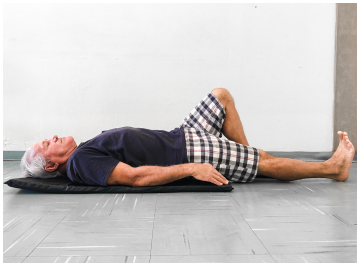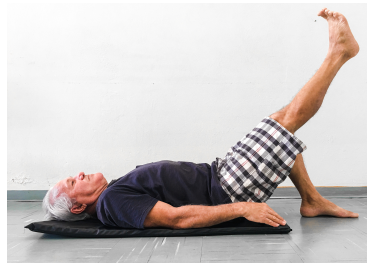

**Name: Straight Leg Raise (SLR) – hip flexion**

**Type: Isotonic**

**Position A:** lie down, one leg bent and another straight, pull up your foot.

**Position B:** raise your leg straight up until it is aligned with the other thigh, then slowly lower it down.

**Sets:** 3

**Repetitions:** 12

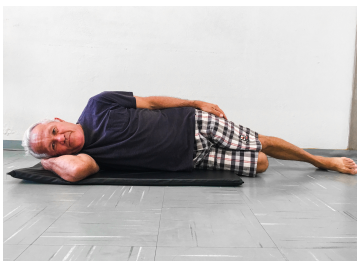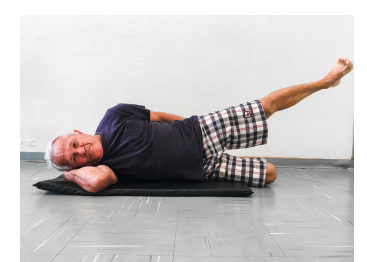

**Name: SLR – hip abduction**

**Type: Isotonic**

**Position A:** side lying position, bend the knee in contact with the floor and straight the other leg.

**Position B:** raise your leg straight up, kneecap pointing forward, pulling up your foot.

**Sets:** 3

**Repetitions:** 12

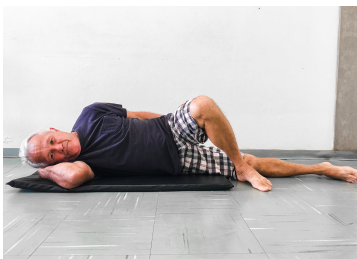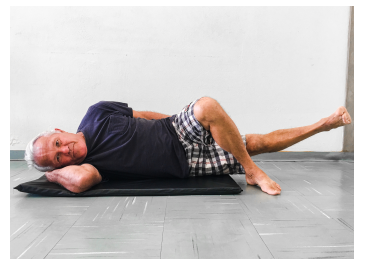

**Name: SLR – hip adduction**

**Type: Isotonic**

**Position A:** side lying position, leg in contact with the floor straight and the other leg bent.

**Position B:** raise your leg straight up, kneecap pointing forward, pulling up your foot.

**Sets:** 3

**Repetitions:** 12

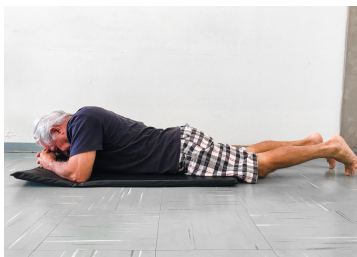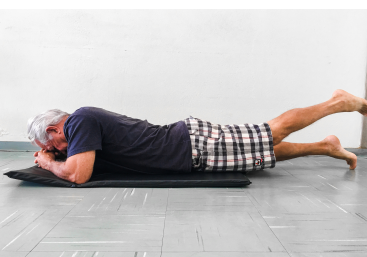

**Name: SLR – hip extension**

**Type: Isotonic**

**Position A:** prone position, both legs straight touching the floor.

**Position B:** raise one leg up at a time, keeping the totally knee straight.

**Sets:** 3

**Repetitions:** 12



# SUPPLEMENTARY FILE

A

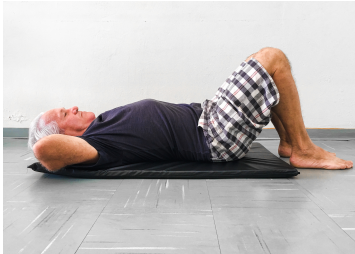

B

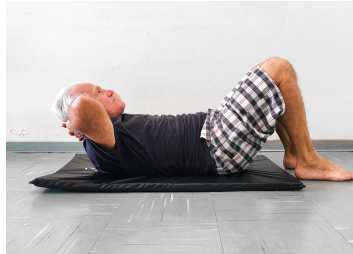

**Name: Abdominal curls (crunch)**

**Type: Isotonic**

**Position A:** lie down on the mat, place your hands behind your head, bend your knees and keep them aligned with hips.

**Position B:** as you exhale, slowly lift your chest up; as you inhale, slowly lower your chest down. Avoid bringing your chin to your chest.

**Sets: 3**

**Repetitions: 12**

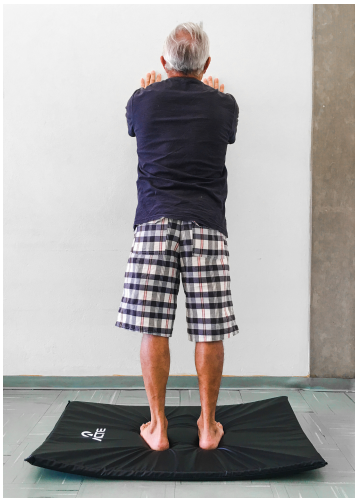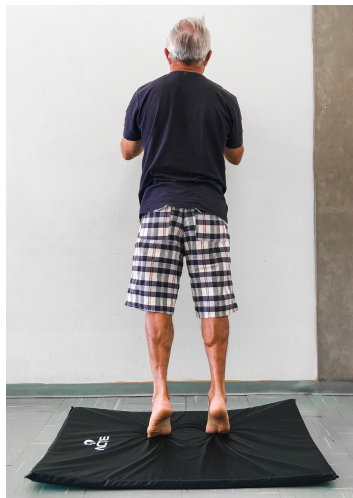

**Name: Standing calf raises**

**Type: Isotonic**

**Position A:** Standing on both legs, hands on the wall for balance (if needed).

**Position B:** rise up on toes then slowly lower down.

**Sets: 3**

**Repetitions: 12**

## Exercise Protocol - Phase 2

A

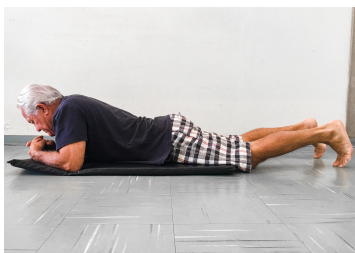

B

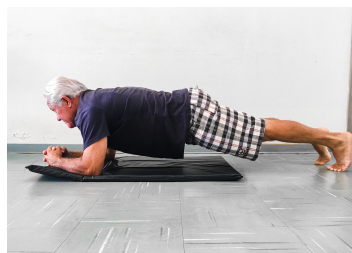

**Name: Plank**

**Type: Isometric**

**Position A:** lying on your belly (prone position).

**Position B:** lift your entire body up with elbow and feet supports. Hold for 15 up to 30 seconds.

**Sets: 3 x 15-30 seconds**

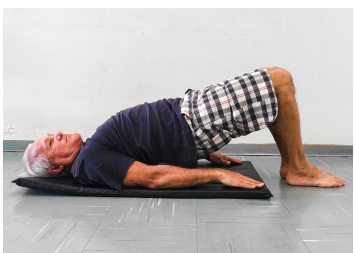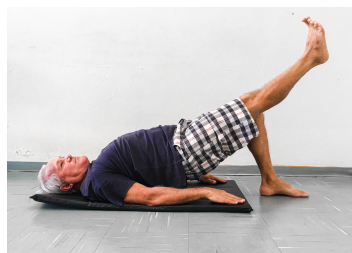

**Name: Bridge with one leg**

**Type: Isometric**

**Position A:** lie down on the mat, knees pointing to the ceiling, knees aligned with hips.

**Position B:** raise your hips up toward the ceiling then carefully take one leg off the floor. Hold for 15 up to 30 s.

**Sets: 3 x 15-30 seconds**

# SUPPLEMENTARY FILE

A

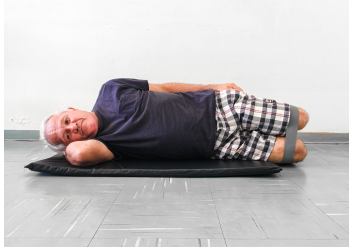

B

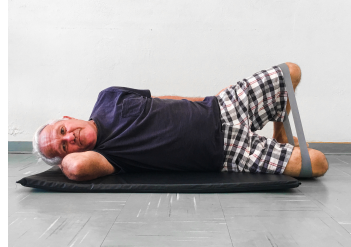**Name: Clam shell****Type: Isotonic****Position A:** side lying position, elastic band around your thighs, knees bent.**Position B:** move your knee away, squeezing your buttocks then slowly return. Repeat with the other side/leg.**Sets: 3****Repetitions: 12**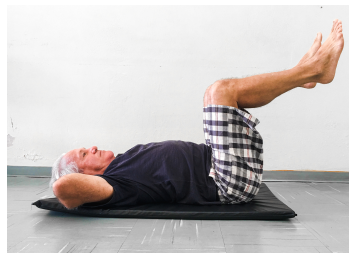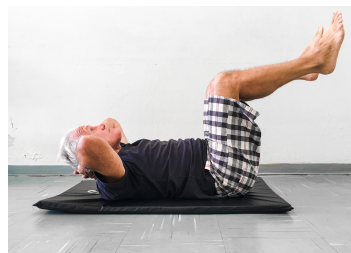**Name: Abdominal curls with lifted legs****Type: Isotonic****Position A:** lie down on the mat, place your hands behind your head, bend your knees and keep them aligned with hips. Lift both legs up.**Position B:** as you exhale, slowly lift your chest up; as you inhale, slowly lower your chest down. Avoid bringing your chin to your chest.**Sets: 3****Repetitions: 12**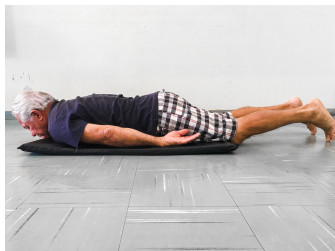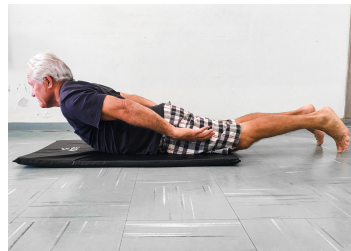**Name: Trunk extension****Type: Isometric****Position A:** lying on your belly (prone position).**Position B:** move your chest away from the floor. Look at the ground. Hold for 30 seconds at least.**Repetitions: 3 x 30 seconds**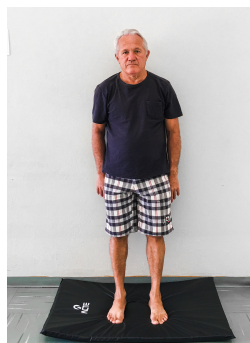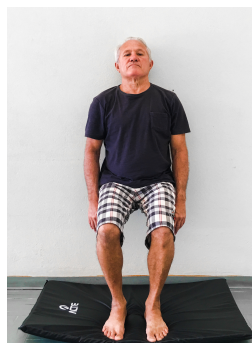**Name: Wall squat****Type: Isometric contraction****Position A:** stand with your trunk to a wall, feet aligned with knees and hips, and away from the wall.**Position B:** slide down and keep your trunk towards the wall. Hold for 30 seconds up to one minute.**Repetitions: 3**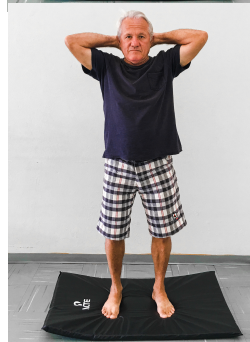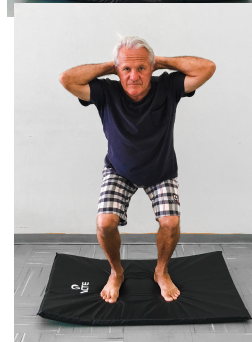**Name: Partial squat****Type: isotonic contraction****Position A:** standing on both legs.**Position B:** slowly bend your knees and stand up again. Maintain your knees over your feet.**Repetitions: 3**

# SUPPLEMENTARY FILE

**A**

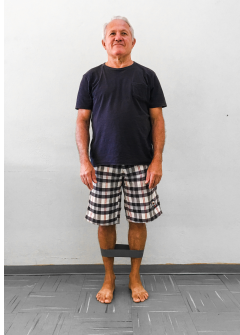

**B**

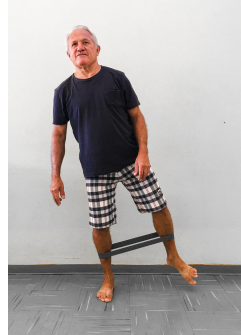

**Name: Standing hip abduction.**

**Type:** static balance

**Position A:** standing on both legs with an elastic band around both legs.

**Position B:** lift one leg out, maintain the kneecap pointing forward, and hold for 30 seconds or more.

**Repetitions:** 3 (each leg)

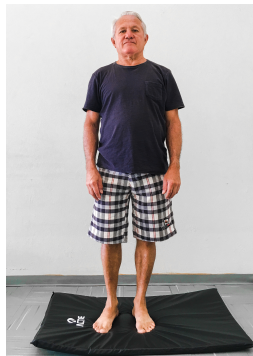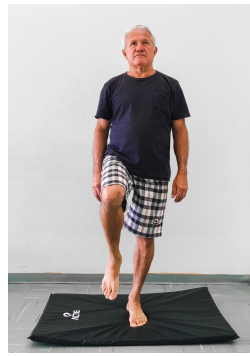

**Name: Standing on one leg**

**Type:** static balance on stable surface

**Position A:** standing on both legs, eyes opened.

**Position B:** standing on one leg, knee slightly bent, lift the other leg off the floor and maintain the position up to 1 minute.

**Repetitions:** 2 (each leg)

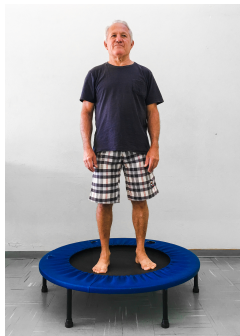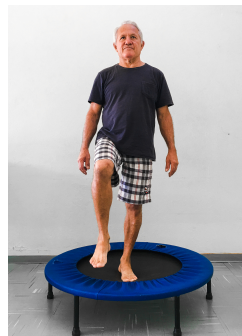

**Name: Standing on one leg**

**Type:** static balance on unstable surface (trampoline, foam etc)

**Position A:** standing on both legs, eyes opened.

**Position B:** standing on one leg, remove another leg from ground and maintain the position.

**Repetitions:** 2 (each leg)

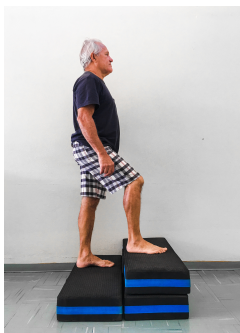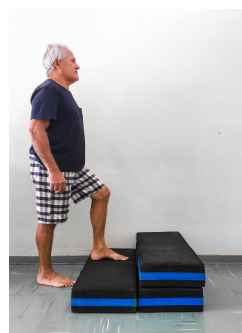

**Name: Step-up**

**Type:** isotonic contraction

**Position A:** on leg onto a step.

**Position B:** step up onto the next step, use the wall for balance if needed.

Step back down carefully to the position A.

**Sets:** 2 (each leg)

**Repetitions:** 12
